# Supplementary material for: Two-component symmetrical diarylation of ynamides
Source: Royal Society of Chemistry journal article supplement (doi:10.1039/d3ob00793f), 2023-01-01
Supplement: d3ob00793f1.pdf [file d3ob00793f1.pdf]

## Two-Component Symmetrical Diarylation of Ynamides

Aradhana Sahoo,<sup>a</sup> Shubham Dutta,<sup>a</sup> and Akhila K. Sahoo\*<sup>a</sup>

<sup>a</sup>School of Chemistry, University of Hyderabad, Hyderabad 500046, India

[akhilchemistry12@gmail.com](mailto:akhilchemistry12@gmail.com); [akssc@uohyd.ac.in](mailto:akssc@uohyd.ac.in)

### SUPPORTING INFORMATION

| <b>Table of Contents</b>                              | <b>Page</b> |
|-------------------------------------------------------|-------------|
| General Experimental Information                      | S2          |
| Materials                                             | S2          |
| Experimental Procedures, Spectral and Analytical data | S3-S14      |
| X-ray crystallographic data                           | S15-S17     |
| References                                            | S17         |
| NMR data                                              | S18-S65     |

## General Experimental Information

All the reactions were performed in oven-dried Schlenk flasks. Commercial grade solvents were distilled prior to use. Column chromatography was performed using either 100–200 Mesh or 230–400 Mesh silica gel or neutral alumina. Thin layer chromatography (TLC) was performed on silica gel GF254 plates and alumina plates.

Proton, carbon, and fluorine nuclear magnetic resonance spectra ( $^1\text{H}$  NMR,  $^{13}\text{C}$  NMR, and  $^{19}\text{F}$  NMR) were recorded based on the resonating frequencies as follows: ( $^1\text{H}$  NMR, 400 MHz;  $^{13}\text{C}$  NMR, 101 MHz;  $^{19}\text{F}$  NMR, 376 MHz) and ( $^1\text{H}$  NMR, 500 MHz;  $^{13}\text{C}$  NMR, 126 MHz;  $^{19}\text{F}$  NMR, 470 MHz) having the solvent resonance as internal standard ( $^1\text{H}$  NMR,  $\text{CDCl}_3$  at 7.26 ppm;  $^{13}\text{C}$  NMR,  $\text{CDCl}_3$  at 77.0 ppm). Few cases tetramethylsilane (TMS) at 0.00 ppm was used as the reference standard. Data for  $^1\text{H}$  NMR are reported as follows: chemical shift (ppm), multiplicity (s = singlet; br s = broad singlet; d = doublet; br d = broad doublet, t = triplet; br t = broad triplet; q = quartet; m = multiplet; tt = triplet of triplet; dq = doublet of quartet), coupling constant,  $J$ , in (Hz), and integration. Data for  $^{13}\text{C}$  NMR, and  $^{19}\text{F}$  NMR were reported in terms of chemical shift (ppm). IR spectra were reported in  $\text{cm}^{-1}$ . High resolution mass spectra were obtained in ESI mode. Melting points were determined by electrothermal heating and are uncorrected. X-ray data was collected at 293 K using graphite monochromatic Mo-K $\alpha$  radiation (0.71073 Å).

### Materials:

Unless otherwise noted, all the reagents and intermediates were obtained commercially and used without purification.  $\text{CH}_3\text{CN}$ , toluene, and 1,4-dioxane were distilled over  $\text{CaH}_2$ .  $\text{Pd}(\text{OAc})_2$  and aryl boronic acids were purchased from commercially available source and used as received. Analytical and spectral data of all the known compounds are exactly matching with the reported values.

Following the known procedure, the ynamides (**1a–n**)<sup>[1,2]</sup> were prepared (Table S1). Analytical and spectral data of these compounds are exactly matching with the reported values.

## Experimental Procedures

### Preparation of Ynamides (1): General Procedure (GP-1):<sup>1,2</sup>

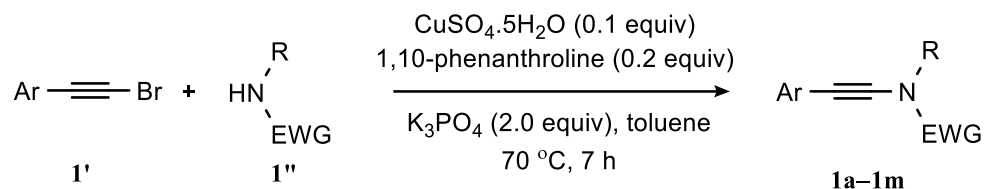

### **General Procedure for the Synthesis of 1a–1m (GP 1):<sup>1</sup>**

To a mixture of **1''** (2.0 mmol), CuSO<sub>4</sub>·5H<sub>2</sub>O (0.2 mmol), 1,10-phenanthroline (0.4 mmol), and K<sub>3</sub>PO<sub>4</sub> (4.0 mmol) in dry toluene (8.0 mL) was added 1-bromo-2-arylacetylene (**1'**). The reaction mixture was heated at 70 °C under a nitrogen atmosphere. Progress of the reaction was monitored periodically by TLC. Upon completion, the reaction mixture was cooled to room temperature and diluted with dichloromethane (10 mL). The crude mixture was filtered through a small pad of Celite and concentrated under reduced pressure. The crude residue was purified through column chromatography using ethyl acetate and hexane mixture on silica gel to provide **1a–m**.

### Preparation of 2-oxazolidinone ynamide (1n):<sup>2</sup>

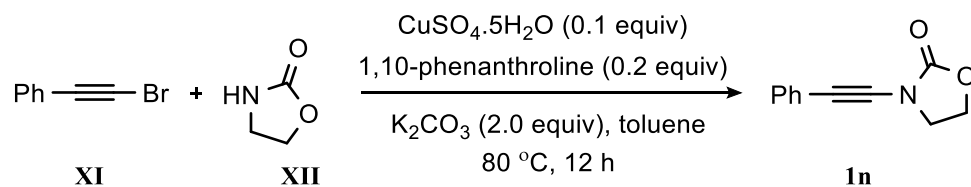

To a mixture of **XII** (2.0 mmol), CuSO<sub>4</sub>·5H<sub>2</sub>O (0.2 mmol), 1,10-phenanthroline (0.4 mmol), and K<sub>2</sub>CO<sub>3</sub> (4.0 mmol) in dry toluene (8.0 mL) was added **XI** (2.4 mmol). The reaction mixture was heated at 80 °C under a nitrogen atmosphere. Progress of the reaction was monitored periodically by TLC. Upon completion, the reaction mixture was cooled to room temperature and diluted with dichloromethane (10 mL). The crude mixture was filtered through a small pad of Celite and concentrated under reduced pressure. The crude residue was purified using column chromatography on silica gel (eluting with EA/hexane : 1/4) to obtain **1n**.

**Table S1: List of Ynamides**

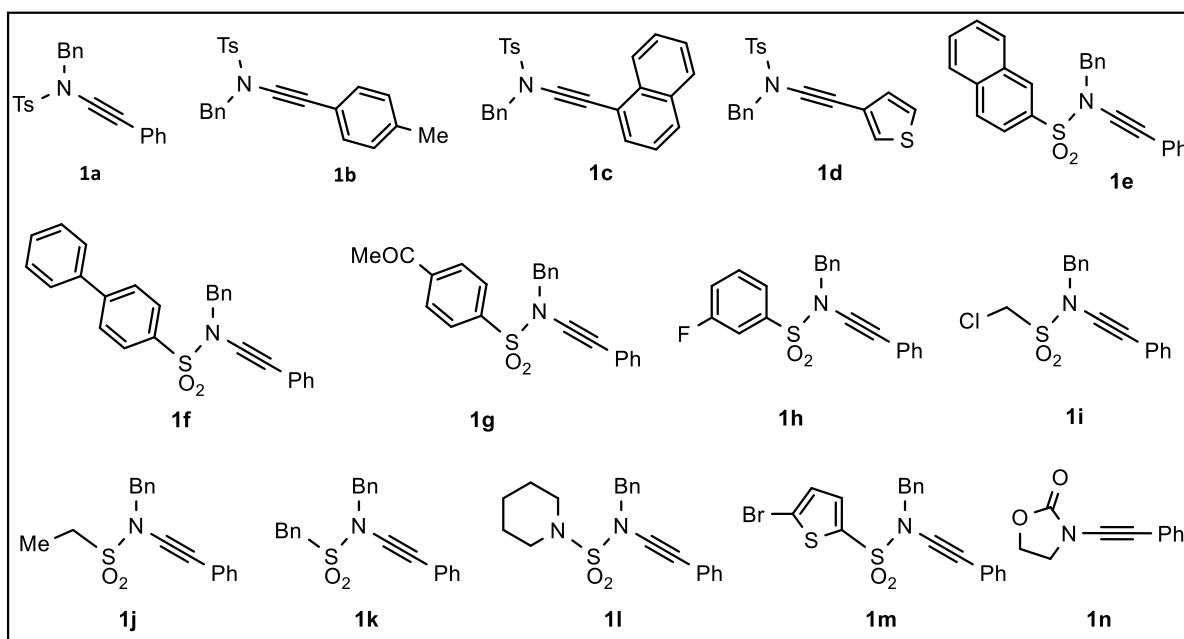

**Table S2: List of Boronic Acids**

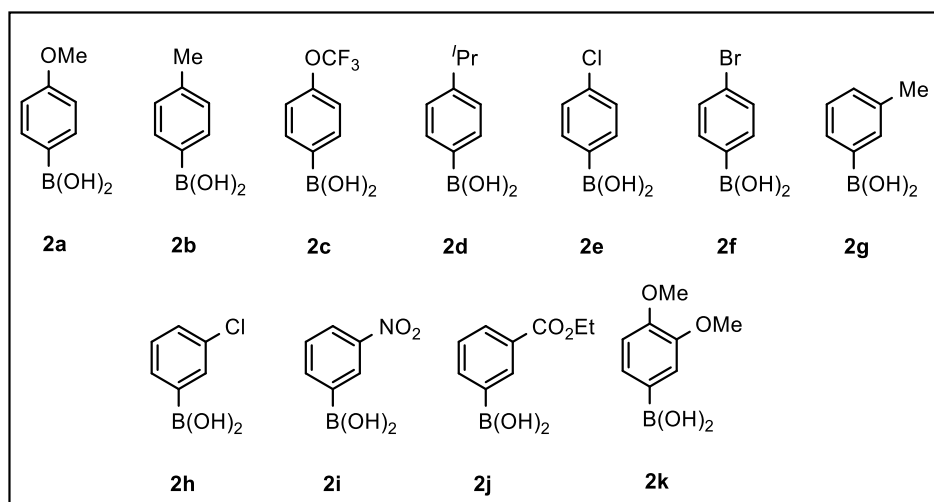

**General Procedure for the symmetrical diarylation of N-sulfonyl Ynamides (1) with Aryl Boronic Acids (2) (GP-2):**

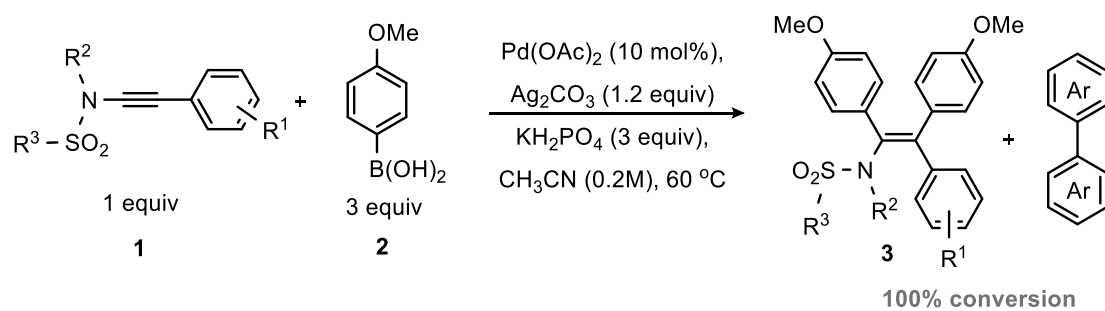

To a mixture of **1** (0.3 mmol) and 4-methoxyphenyl boronic acid **2** (136.8 mg, 0.9 mmol), Pd(OAc)<sub>2</sub> (6.7 mg, 0.03 mmol), KH<sub>2</sub>PO<sub>4</sub> (122.5 mg, 0.9 mmol), and Ag<sub>2</sub>CO<sub>3</sub> (99.3 mg, 0.36 mmol) was added acetonitrile (CH<sub>3</sub>CN; 1.5 mL). The reaction mixture was stirred at 60 °C for 5 h. Progress of the reaction was monitored periodically by TLC. Upon completion, the reaction mixture was diluted with ethyl acetate (10 mL). The crude mixture was filtered through a small pad of Celite and concentrated under reduced pressure. The crude residue was purified through column chromatography to afford **3a–m**.

**(E)-N-Benzyl-N-(1,2-bis(4-methoxyphenyl)-2-phenylvinyl)-4-methylbenzenesulfonamide (3a):**

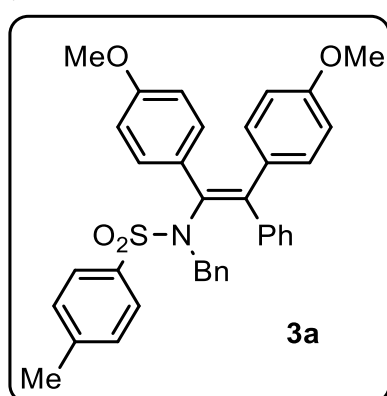

**3a** (134 mg, 77%) as yellow solid; M.P = 210–212 °C;  $R_f$  = 0.6 (15% EtOAc/Hex); <sup>1</sup>H NMR (500 MHz, CDCl<sub>3</sub>):  $\delta$  7.31–7.29 (m, 2H), 7.29–7.27 (m, 1H), 7.23 (t,  $J$  = 8.0 Hz, 3H), 7.10 (br d,  $J$  = 6.5 Hz, 2H), 7.04 (d,  $J$  = 8.0 Hz, 2H), 6.95 (d,  $J$  = 8.0 Hz, 2H), 6.84 (d,  $J$  = 8.5 Hz, 2H), 6.78 (s, 1H), 6.76 (dt,  $J$  = 7.5, 2.5 Hz, 3H), 6.58–6.55 (m, 4H), 4.25 (br d,  $J$  = 14.5 Hz, 1H), 3.98 (br d,  $J$  = 14.5 Hz, 1H), 3.74 (s, 3H), 3.70

(s, 3H), 2.38 (s, 3H); <sup>13</sup>C NMR (101 MHz, CDCl<sub>3</sub>):  $\delta$  158.7, 158.2, 142.9, 142.2, 141.3, 137.8, 136.2, 135.0, 133.0, 132.9, 132.5, 130.2, 130.1, 129.7, 128.9, 128.3, 128.2, 128.1, 128.0, 127.2, 113.2, 113.1, 55.1, 55.0, 51.0, 21.4; IR (Neat)  $\nu_{max}$  1604, 1508, 1248, 1152, 1027, 659 cm<sup>-1</sup>; HRMS (ESI) for C<sub>36</sub>H<sub>33</sub>NO<sub>4</sub>SN<sup>+</sup> (M+Na)<sup>+</sup>: calcd. 598.2023, found 598.2019.

**(E)-N-Benzyl-N-(1,2-bis(4-methoxyphenyl)-2-(p-tolyl)vinyl)-4-methylbenzenesulfonamide (3b):**

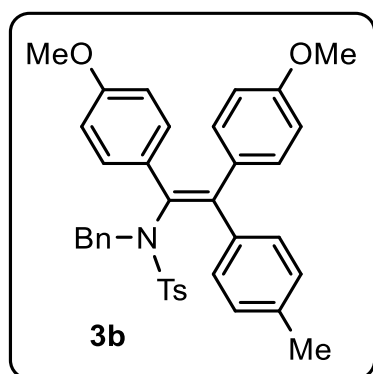

**3b** (93 mg, 53%) as yellow solid; M.P = 141–143 °C;  $R_f$  = 0.7 (15% EtOAc/Hex); <sup>1</sup>H NMR (500 MHz, DMSO-D<sub>6</sub>):  $\delta$  7.33 (d,  $J$  = 5.0 Hz, 1H), 7.30 (t,  $J$  = 6.5 Hz, 2H), 7.15 (d,  $J$  = 8.5 Hz, 2H), 7.12 (d,  $J$  = 8.0 Hz, 2H), 6.99 (d,  $J$  = 8.5 Hz, 3H), 6.97 (s, 1H), 6.85 (d,  $J$  = 7.0 Hz, 2H), 6.66–6.63 (m, 4H), 6.57 (d,  $J$  = 9.0 Hz, 2H), 6.52 (d,  $J$  = 9.0 Hz, 2H), 4.30 (br d,  $J$  = 14.5 Hz, 1H), 3.86 (br d,  $J$  = 14.5 Hz, 1H), 3.67 (s, 3H), 3.64 (s, 3H),

2.37 (d,  $J$  = 2.5 Hz, 6H); <sup>13</sup>C NMR (126 MHz, CDCl<sub>3</sub>):  $\delta$  158.5, 158.0, 142.8, 140.8, 139.1, 138.0, 137.1, 136.3, 135.0, 132.7, 132.4, 130.2, 129.9, 128.9, 128.8, 128.3, 128.1, 127.9,

113.0, 55.1, 55.0, 51.0, 29.7, 21.5, 21.3; IR (Neat):  $\nu_{\max}$  1703, 1352, 1155, 1087, 732, 699  $\text{cm}^{-1}$ ; HRMS (ESI) for  $\text{C}_{37}\text{H}_{36}\text{NO}_4\text{S}^+$  ( $\text{M}+\text{H}$ ) $^+$ : calcd.590.2360, found 590.2357.

**(Z)-N-(1,2-Bis(4-methoxyphenyl)-2-(naphthalen-1-yl)vinyl)-N,4-dimethylbenzenesulfonamide (3c):**

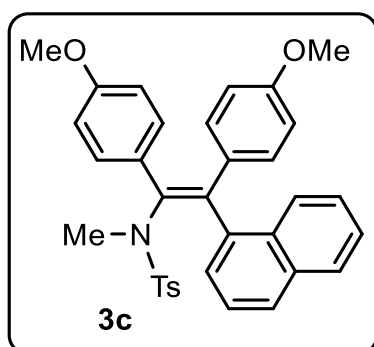

**3c** (101 mg, 61%) as yellow solid; M.P = 218–220 °C;  $R_f$  = 0.2 (15% EtOAc/Hex);  $^1\text{H}$  NMR (500 MHz,  $\text{DMSO}-\text{D}_6$ ):  $\delta$  7.94–7.48 (m, 6H), 7.46–7.31 (m, 3H), 7.22–7.06 (m, 2H), 6.90–6.83 (m, 3H), 6.80–6.76 (m, 3H), 6.63–6.58 (m, 2H), 3.73 (s, 3H), 3.59 (s, 3H), 2.63 (br s, 3H), 2.25 (s, 3H);  $^{13}\text{C}$  NMR (126 MHz,  $\text{DMSO}-\text{D}_6$ ):  $\delta$  159.1, 158.3, 142.9, 139.0, 136.9, 134.2, 133.6, 132.3, 131.5, 129.5, 129.3, 128.7, 128.3,

126.9, 126.5, 126.0, 113.9, 113.8, 55.5, 55.3, 37.5, 29.5, 21.3; IR (Neat):  $\nu_{\max}$  1604, 1508, 1337, 1247, 1028, 790  $\text{cm}^{-1}$ ; HRMS (ESI) for  $\text{C}_{34}\text{H}_{31}\text{NO}_4\text{SNa}^+$  ( $\text{M}+\text{Na}$ ) $^+$ : calcd.572.1866, found 572.1866.

**(Z)-N-Benzyl-N-(1,2-bis(4-methoxyphenyl)-2-(thiophen-3-yl)vinyl)-4-methylbenzenesulfonamide (3d):**

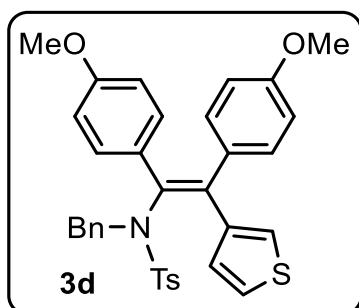

**3d** (84 mg, 48%) as yellow solid; M.P = 190-192 °C;  $R_f$  = 0.6 (15% EtOAc/Hex);  $^1\text{H}$  NMR (500 MHz,  $\text{DMSO D}_6$ ):  $\delta$  7.64 (dd,  $J$  = 5.0, 3.0 Hz, 1H), 7.42–7.34 (m, 3H), 7.23 (d,  $J$  = 8.0 Hz, 2H), 7.21 (dd,  $J$  = 3.0, 1.5 Hz, 1H), 7.17 (d,  $J$  = 8.5 Hz, 2H), 7.12 (dd,  $J$  = 5.0, 1.0 Hz, 1H), 7.07–7.02 (m, 2H), 6.76–7.69 (m, 4H), 6.52–6.48 (m, 4H), 4.57 (br d,  $J$  = 14.5

Hz, 1H), 4.01 (br d,  $J$  = 14.5 Hz, 1H), 3.71 (s, 3H), 3.70 (s, 3H), 2.42 (s, 3H);  $^{13}\text{C}$  NMR (101 MHz,  $\text{DMSO}-\text{D}_6$ ):  $\delta$  159.2, 158.4, 143.3, 134.4, 133.2, 132.6, 132.1, 131.6, 130.1, 130.0, 129.5, 129.2, 128.7, 128.4, 128.0, 127.6, 127.0, 125.9, 113.9, 55.7, 55.4, 46.7, 21.3; IR (Neat):  $\nu_{\max}$  1601, 1507, 1244, 1152, 747  $\text{cm}^{-1}$ ; HRMS (ESI) for  $\text{C}_{34}\text{H}_{35}\text{N}_2\text{O}_4\text{S}_2^+$  ( $\text{M}+\text{NH}_4$ ) $^+$ : calcd.599.2033, found 599.2033.

**(E)-N-Benzyl-N-(1,2-bis(4-methoxyphenyl)-2-phenylvinyl)naphthalene-2-sulfonamide (3e):**

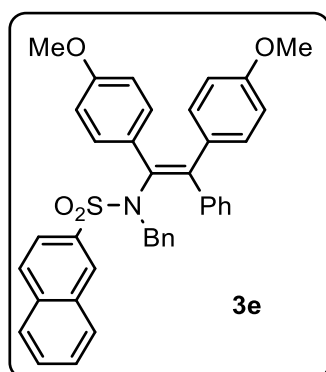

**3e** (112 mg, 62%) as yellow solid; M.P = 215–218 °C;  $R_f$  = 0.8 (15% EtOAc/Hex);  $^1\text{H}$  NMR (500 MHz,  $\text{CDCl}_3$ ):  $\delta$  7.84 (d,  $J$  = 8.5 Hz, 1H), 7.71 (d,  $J$  = 8.5 Hz, 1H), 7.64 (d,  $J$  = 8.0 Hz, 1H), 7.62–7.57 (m, 1H), 7.56–7.50 (m, 2H), 7.38–7.30 (m, 5H), 7.20 (t,  $J$  = 7.5 Hz, 2H), 7.15 (dd,  $J$  = 9.0, 2.0 Hz, 2H), 6.90 (d,  $J$  = 7.0 Hz, 2H), 6.78 (dt,  $J$  = 8.5, 3.0 Hz, 2H), 6.71 (br d,  $J$  = 8.0 Hz, 2H), 6.58 (dt,  $J$  = 9.0, 2.5 Hz, 2H), 6.39 (d,  $J$  = 8.5 Hz, 2H), 4.45 (br d,

$J$  = 14.5 Hz, 1H), 4.02 (br d,  $J$  = 14.5 Hz, 1H), 3.70 (s, 3H), 3.59 (s, 3H);  $^{13}\text{C}$  NMR (126 MHz,  $\text{CDCl}_3$ ):  $\delta$  158.5, 158.1, 141.0, 140.6, 137.8, 136.2, 134.7, 134.4, 133.3, 132.8, 132.5, 131.8, 130.2, 130.1, 129.41, 129.39, 129.2, 128.42, 128.36, 128.33, 128.28, 128.2, 127.6, 127.5, 126.9, 123.0, 113.1, 113.0, 55.0, 54.9, 51.6; IR (Neat):  $\nu_{\text{max}}$  1604, 1507, 1246, 1153, 1024, 698  $\text{cm}^{-1}$ ; HRMS (ESI) for  $\text{C}_{39}\text{H}_{34}\text{NO}_4\text{S}^+$  ( $\text{M}+\text{H}$ ) $^+$ : calcd.612.2203, found 612.2200.

**(E)-N-Benzyl-N-(1,2-bis(4-methoxyphenyl)-2-phenylvinyl)-[1,1'-biphenyl]-4-sulfonamide (3f):**

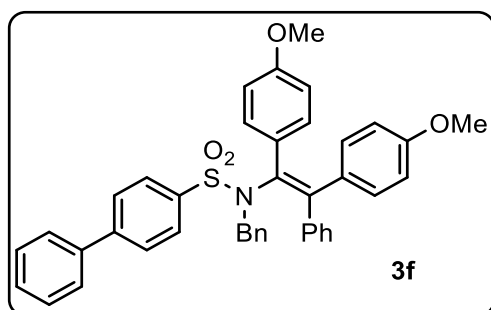

**3f** (118 mg, 65%) as yellow solid; M.P = 205–207 °C;  $R_f$  = 0.9 (15% EtOAc/Hex);  $^1\text{H}$  NMR (500 MHz,  $\text{CDCl}_3$ ):  $\delta$  7.60 (d,  $J$  = 7.0 Hz, 2H), 7.52–7.44 (m, 5H), 7.42 (dt,  $J$  = 7.5, 2.0 Hz 1H), 7.34–7.29 (m, 4H), 7.25 (d,  $J$  = 7.0 Hz, 1H), 7.17 (br d,  $J$  = 5.5 Hz, 2H), 7.14 (dt,  $J$  = 8.5, 2.0 Hz 2H), 6.87 (d,  $J$  = 7.0

Hz, 2H), 6.85 (d,  $J$  = 6.5 Hz, 2H), 6.79 (dt,  $J$  = 9.0, 3.0 Hz, 2H), 6.59 (dt,  $J$  = 8.5, 3.0 Hz, 2H) 6.56 (d,  $J$  = 9.0 Hz, 2H), 4.35 (br d,  $J$  = 15.0 Hz, 1H), 4.05 (br d,  $J$  = 14.5 Hz, 1H), 3.73 (s, 3H), 3.71 (s, 3H);  $^{13}\text{C}$  NMR (126 MHz,  $\text{CDCl}_3$ ):  $\delta$  158.6, 158.1, 144.9, 142.1, 141.2, 139.4, 139.3, 136.0, 134.8, 133.0, 132.8, 132.4, 130.2, 130.1, 129.6, 129.0, 128.37, 128.35, 128.32, 128.25, 128.2, 127.3, 127.2, 126.8, 113.12, 113.06, 55.1, 55.0, 51.3; IR (Neat):  $\nu_{\text{max}}$  1604, 1507, 1245, 1155, 1026, 698  $\text{cm}^{-1}$ ; HRMS (ESI) for  $\text{C}_{41}\text{H}_{35}\text{NO}_4\text{SNa}^+$  ( $\text{M}+\text{Na}$ ) $^+$ : calcd.660.2179, found 660.2173.

**(E)-4-Acetyl-N-benzyl-N-(1,2-bis(4-methoxyphenyl)-2-phenylvinyl)benzenesulfonamide**

**(3g):**

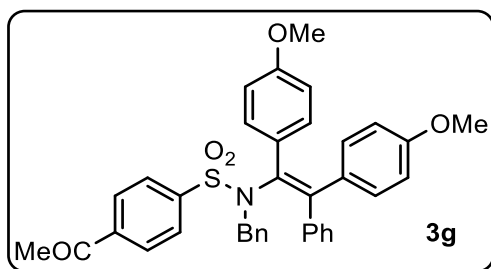

**3g** (88 mg, 49%) as yellow solid; M.P = 160–162 °C;  $R_f$  = 0.1 (10% EtOAc/Hex;  $^1\text{H}$  NMR (500 MHz, DMSO- $\text{D}_6$ ):  $\delta$  7.84 (d,  $J$  = 8.0 Hz, 2H), 7.38–7.33 (m, 5H), 7.32–7.22 (m, 4H), 7.21–7.18 (m, 2H), 6.98 (d,  $J$  = 8.0 Hz, 2H), 6.69–6.64 (m, 4H), 6.50–6.47 (m,

3H), 4.45 (br d,  $J$  = 14.5 Hz, 1H), 3.90 (br d,  $J$  = 14.5 Hz, 1H), 3.36 (s, 6H), 2.62 (s, 3H);  $^{13}\text{C}$  NMR (126 MHz, DMSO- $\text{D}_6$ ):  $\delta$  197.8, 158.9, 158.4, 144.4, 141.9, 140.5, 139.8, 136.0, 134.6, 133.2, 132.6, 132.4, 130.5, 130.0, 129.8, 129.5, 129.0, 128.9, 128.8, 128.7, 128.2, 127.8, 113.9, 113.6, 55.5, 55.4, 51.5, 27.5; IR (Neat):  $\nu_{\text{max}}$  1604, 1508, 1337, 1247, 1028, 790  $\text{cm}^{-1}$ ; HRMS (ESI) for  $\text{C}_{37}\text{H}_{33}\text{NO}_5\text{SNa}^+$  ( $\text{M}+\text{Na}$ ) $^+$ : calcd. 626.1972, found 626.1973.

**(E)-N-Benzyl-N-(1,2-bis(4-methoxyphenyl)-2-phenylvinyl)-3-fluorobenzenesulfonamide**

**(3h):**

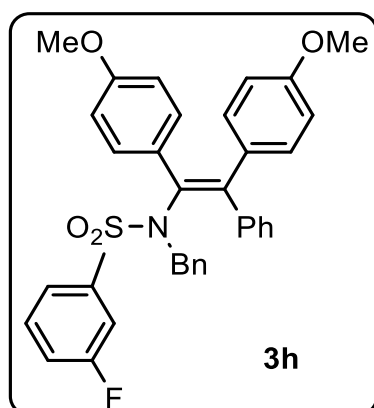

**3h** (106 mg, 60%) as yellow solid; M.P = 76–79 °C;  $R_f$  = 0.5 (10% EtOAc/Hex);  $^1\text{H}$  NMR (500 MHz, DMSO- $\text{D}_6$ ):  $\delta$  7.48–7.40 (m, 3H), 7.38–7.35 (m, 4H), 7.32 (t,  $J$  = 7.5 Hz, 2H), 7.22 (d,  $J$  = 7.0 Hz, 1H), 7.21–7.17 (m, 2H), 6.96 (d,  $J$  = 7.0 Hz, 2H), 6.67 (q,  $J$  = 9.5 Hz, 4H), 6.54–6.52 (m, 3H), 6.49 (d,  $J$  = 8.5 Hz, 1H), 4.42 (br d,  $J$  = 14.5 Hz, 1H), 3.90 (br d,  $J$  = 14.0 Hz, 1H), 3.65 (d,  $J$  = 6.5 Hz, 6H);  $^{13}\text{C}$  NMR (126 MHz,  $\text{CDCl}_3$ ):  $\delta$  161.9 (d,  $J$  = 251 Hz, 1C), 158.8, 158.2, 141.8,

141.1, 135.9, 134.6, 132.9, 132.7, 132.4, 130.2, 129.9, 129.8, 129.7, 129.4, 129.1, 128.8, 128.7, 128.5, 128.3, 127.7, 123.4 (d,  $J$  = 2.5 Hz, 1C), 119.3 (d,  $J$  = 21 Hz, 1C), 115.1 (d,  $J$  = 24 Hz, 1C), 113.1 (d,  $J$  = 11 Hz, 1C), 55.0 (d,  $J$  = 10 Hz, 1C), 51.6;  $^{19}\text{F}$  NMR (400 MHz,  $\text{CDCl}_3$ ):  $\delta$  -110.43; IR (Neat):  $\nu_{\text{max}}$  1603, 1508, 1348, 1247, 1149, 1024, 694  $\text{cm}^{-1}$ ; HRMS (ESI) for  $\text{C}_{35}\text{H}_{31}\text{FNO}_4\text{S}^+$  ( $\text{M}+\text{H}$ ) $^+$ : calcd. 580.1952, found 580.1951.



**(E)-N-Benzyl-N-(1,2-bis(4-methoxyphenyl)-2-phenylvinyl)-1-chloromethanesulfonamide (3i):**

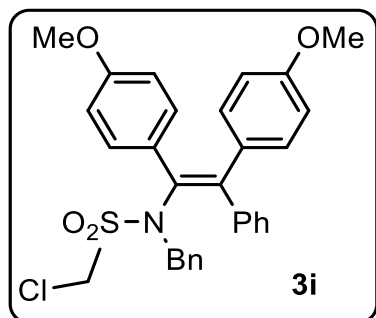

**3i** (105 mg, 65%) as yellow solid; M.P = 112–115 °C;  $R_f$  = 0.9 (15% EtOAc/Hex);  $^1\text{H NMR}$  (500 MHz, DMSO- $\text{D}_6$ ):  $\delta$  6.18–6.14 (m, 3H), 6.05–6.01 (m, 2H), 6.00–5.95 (m, 3H), 5.62–5.58 (m, 2H), 5.49 (d,  $J$  = 7.5 Hz, 4H), 5.38–5.35 (m, 4H), 3.01 (d,  $J$  = 11.5 Hz, 1H), 2.89 (t,  $J$  = 5.0 Hz, 2H), 2.41 (d,  $J$  = 3.0 Hz, 3H), 2.34 (d,  $J$  = 3.0 Hz, 3H), 1.94 (br d,  $J$  =

10.5 Hz, 1H);  $^{13}\text{C NMR}$  (126 MHz,  $\text{CDCl}_3$ ):  $\delta$  159.0, 158.4, 141.6, 140.7, 135.6, 134.1, 133.2, 132.2, 130.8, 129.6, 128.8, 128.7, 128.6, 128.4, 127.7, 113.6, 113.2, 57.2, 55.1, 55.0, 52.7; IR (Neat):  $\nu_{\text{max}}$  1604, 1508, 1348, 1245, 1027, 733  $\text{cm}^{-1}$ ; HRMS (ESI) for  $\text{C}_{30}\text{H}_{29}\text{ClNO}_4\text{S}^+$  ( $\text{M}+\text{H}^+$ ): calcd. 534.1500, found 534.1500.

**(E)-N-Benzyl-N-(1,2-bis(4-methoxyphenyl)-2-phenylvinyl)ethanesulfonamide (3j):**

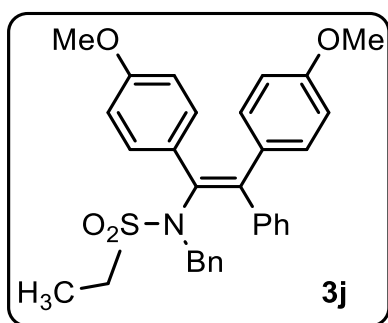

**3j** (109 mg, 70%) as yellow solid; M.P = 170–172 °C;  $R_f$  = 0.4 (10% EtOAc/Hex);  $^1\text{H NMR}$  (500 MHz, DMSO- $\text{D}_6$ ):  $\delta$  6.59–6.55 (m, 3H), 6.41–6.38 (m, 2H), 6.36–6.31 (m, 3H), 6.06 (d,  $J$  = 8.5 Hz, 2H), 6.98–6.95 (m, 2H), 5.87 (d,  $J$  = 9.0 Hz, 2H), 5.82 (d,  $J$  = 8.5 Hz, 2H), 5.76 (d,  $J$  = 9.0 Hz, 2H), 3.24 (q,  $J$  = 15.0 Hz, 2H), 2.80 (s, 3H), 2.74 (s, 3H), 1.75–1.66

(m, 1H), 1.93–0.94 (m, 1H), 0.08 (t,  $J$  = 7.5 Hz, 3H);  $^{13}\text{C NMR}$  (126 MHz,  $\text{CDCl}_3$ ):  $\delta$  158.8, 158.1, 142.2, 140.2, 136.5, 134.6, 134.2, 132.4, 132.3, 130.4, 129.8, 129.4, 128.6, 128.3, 128.0, 127.2, 113.5, 113.1, 55.1, 55.0, 51.9, 49.4, 7.8; IR (Neat):  $\nu_{\text{max}}$  1604, 1507, 1329, 1244, 1141, 1027, 699  $\text{cm}^{-1}$ ; HRMS (ESI) for  $\text{C}_{31}\text{H}_{31}\text{NO}_4\text{SNa}^+$  ( $\text{M}+\text{Na}^+$ ): calcd. 536.1866, found 536.1868.

**(E)-N-Benzyl-N-(1,2-bis(4-methoxyphenyl)-2-phenylvinyl)-1-phenylmethanesulfonamide (3k):**

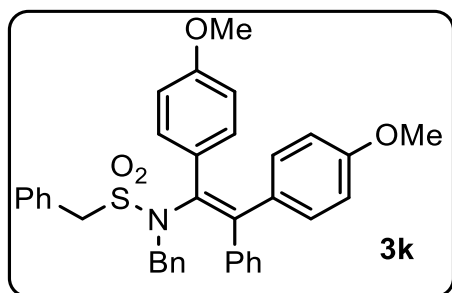

**3k** (94 mg, 55%) as yellow solid; M.P = 188–190 °C;  $R_f$  = 0.3 (10% EtOAc/Hex);  $^1\text{H NMR}$  (500 MHz,  $\text{CDCl}_3$ ):  $\delta$  7.43 (t,  $J$  = 3.5 Hz, 3H), 7.32–7.27 (m, 5H), 7.24 (dt,  $J$  = 7.0, 2.0 Hz, 1H), 7.21–7.18 (m, 2H), 7.16–7.12 (m, 2H), 7.11 (d,  $J$  = 8.5 Hz, 2H), 7.06 (br d,  $J$  = 7.0 Hz, 2H), 6.85 (d,  $J$  = 8.5 Hz, 2H), 6.75 (d,  $J$  =

9.0 Hz, 2H), 6.61 (dt,  $J = 9.0, 3.0$  Hz, 2H), 4.32 (br d,  $J = 14.5$  Hz, 1H) 4.20 (br d,  $J = 14.5$  Hz, 1H), 3.78 (s, 3H), 3.72 (s, 3H), 3.50 (br d,  $J = 13.5$  Hz, 1H), 2.77 (br d,  $J = 13.5$  Hz, 1H);  $^{13}\text{C}$  NMR (101 MHz,  $\text{CDCl}_3$ ):  $\delta$  158.9, 158.2, 142.4, 140.5, 136.2, 134.5, 132.5, 132.3, 130.8, 130.6, 130.0, 129.2, 128.7, 128.6, 128.4, 128.3, 128.1, 127.3, 113.6, 113.1, 60.5, 55.1, 55.0, 52.4; IR (Neat)  $\nu_{\text{max}}$  1604, 1508, 1245, 1144, 1027, 698  $\text{cm}^{-1}$ ; HRMS (ESI) for  $\text{C}_{36}\text{H}_{37}\text{N}_2\text{O}_4\text{S}^+$  ( $\text{M}+\text{NH}_4$ ) $^+$ : calcd. 593.2469, found 593.2467.

**(E)-N-Benzyl-N-(1,2-bis(4-methoxyphenyl)-2-phenylvinyl)piperidine-1-sulfonamide (3l):**

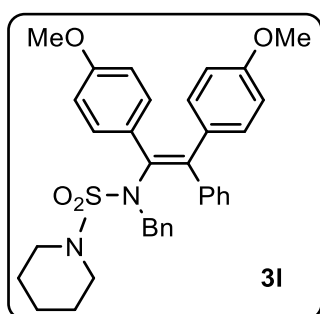

**3l** (99 mg, 58%) as yellow solid; M.P = 225–227 °C;  $R_f = 0.9$  (15% EtOAc/Hex);  $^1\text{H}$  NMR (500 MHz,  $\text{DMSO}-d_6$ ):  $\delta$  7.49–7.45 (m, 3H), 7.20–7.16 (m, 3H), 7.15–7.12 (m, 2H), 7.08 (d,  $J = 8.0$  Hz, 2H), 6.77 (d,  $J = 8.5$  Hz, 2H), 6.69–6.61 (m, 6H), 4.01 (br d,  $J = 14.0$  Hz, 1H) 3.88 (br d,  $J = 14.0$  Hz, 1H), 3.71 (s, 3H), 3.63 (s, 3H), 2.58–2.51 (m, 3H), 1.39–1.34 (m, 2H), 1.31–1.20 (m, 5H);

$^{13}\text{C}$  NMR (126 MHz,  $\text{CDCl}_3$ ):  $\delta$  158.7, 158.0, 142.6, 142.3, 136.4, 135.2, 133.9, 133.0, 132.3, 130.6, 130.3, 129.7, 128.3, 128.1, 127.9, 127.6, 126.8, 113.3, 113.0, 55.1, 55.0, 51.4, 46.9, 46.4, 25.5, 23.8; IR (Neat):  $\nu_{\text{max}}$  1604, 1508, 1246, 1141, 1030, 733, 699  $\text{cm}^{-1}$ ; HRMS (ESI) for  $\text{C}_{34}\text{H}_{37}\text{N}_2\text{O}_4\text{S}^+$  ( $\text{M}+\text{H}$ ) $^+$ : calcd. 569.2469, found 569.2468.

**(E)-N-Benzyl-N-(1,2-bis(4-methoxyphenyl)-2-phenylvinyl)-5-bromothiophene-2-sulfonamide (3m):**

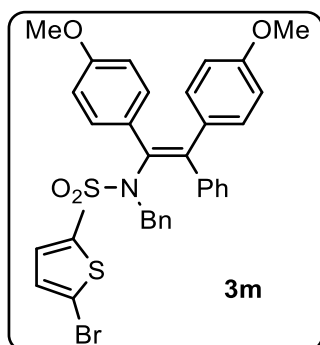

**3m** (90 mg, 46%) as yellow solid; M.P = 196–199 °C;  $R_f = 0.4$  (10% EtOAc/Hex);  $^1\text{H}$  NMR (500 MHz,  $\text{DMSO}-d_6$ ):  $\delta$  7.39 (t,  $J = 8.0$  Hz, 3H), 7.35–7.32 (m, 3H), 7.18 (d,  $J = 4.0$  Hz, 1H), 7.16–7.14 (m, 2H), 7.08 (t,  $J = 6.5$  Hz, 2H), 6.89 (d,  $J = 4.5$  Hz, 1H), 6.67 (q,  $J = 9.5$  Hz, 4H), 6.56 (q,  $J = 9.0$  Hz, 4H), 4.41 (br d,  $J = 14.5$  Hz, 1H), 3.96 (br d,  $J = 14.5$  Hz, 1H) 3.67 (s, 3H), 3.64 (s, 3H);  $^{13}\text{C}$  NMR (126 MHz,  $\text{DMSO}-d_6$ ):  $\delta$  159.0, 158.4, 142.9,

141.9, 140.9, 135.8, 134.4, 133.4, 133.2, 132.6, 132.3, 131.2, 130.9, 130.6, 129.8, 129.4, 129.03, 129.00, 128.8, 128.1, 119.9, 114.3, 113.9, 113.6, 56.0, 55.5, 55.4, 52.1, 26.9; IR (Neat)  $\nu_{\text{max}}$  1604, 1507, 1244, 1149, 1023, 699  $\text{cm}^{-1}$ ; HRMS (ESI) for  $\text{C}_{33}\text{H}_{28}\text{BrNO}_4\text{S}_2\text{Na}^+$  ( $\text{M}+\text{Na}$ ) $^+$ : calcd. 668.0535, found 668.0540.

**General Procedure for the symmetrical diarylation of oxazolidone Ynamides (**1**) with Aryl Boronic Acids (**2**) (GP-3):**

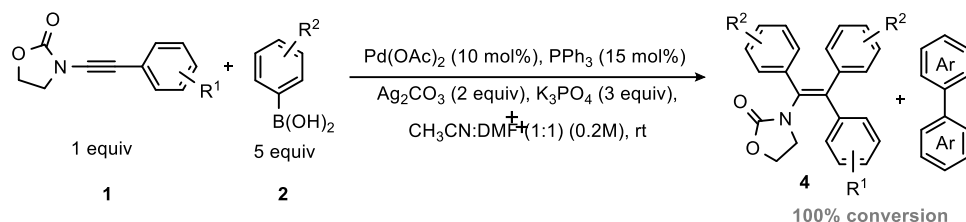

To a mixture of **1** (0.15 mmol) and aryl boronic acid **2** (0.75 mmol), Pd(OAc)<sub>2</sub> (3.4mg, 0.015 mmol), K<sub>3</sub>PO<sub>4</sub> (95.5mg, 0.45 mmol), and Ag<sub>2</sub>CO<sub>3</sub> (82.7mg, 0.3 mmol) was added acetonitrile and dimethylformamide in the ratio 1:1 (CH<sub>3</sub>CN:DMF (1:1); 0.75 mL). The reaction mixture was stirred at 25 °C 4–5 hrs. Progress of the reaction was monitored periodically by TLC. Upon completion, the reaction mixture was diluted with ethyl acetate (10 mL). The crude mixture was filtered through a small pad of Celite and concentrated under reduced pressure. The crude residue was purified through column chromatography to afford **4a–j**.

**(E)-3-(2-Phenyl-1,2-di-*p*-tolylvinyl)oxazolidin-2-one (**4a**):**

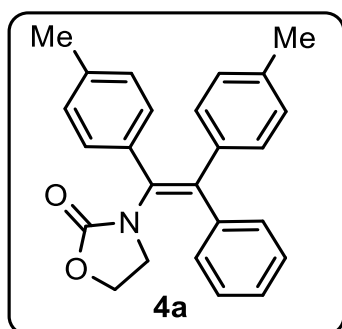

**4a** (33 mg, 59%) as yellow solid; M.P = 224–226 °C;  $R_f$  = 0.6 (30% EtOAc/Hex); <sup>1</sup>H NMR (500 MHz, CDCl<sub>3</sub>):  $\delta$  7.36–7.31 (m, 2H), 7.30–7.27 (m, 2H), 7.26–7.25 (m, 1H), 7.09 (d,  $J$  = 8.0 Hz, 2H), 6.99 (d,  $J$  = 8.0 Hz, 2H), 6.94–6.90 (m, 4H), 4.18 (t,  $J$  = 8.0 Hz, 2H), 3.50 (t,  $J$  = 8.0 Hz, 2H), 2.89 (s, 3H), 2.26 (s, 3H); <sup>13</sup>C NMR (101 MHz, CDCl<sub>3</sub>):  $\delta$  155.9, 142.0, 140.0, 137.8, 136.9, 133.3, 131.6, 130.8, 129.4, 129.0, 128.6, 128.4, 127.6, 62.1, 46.1, 21.3, 21.2; IR (Neat):  $\nu_{\max}$  1753, 1611, 1401, 1343, 1180, 681 cm<sup>-1</sup>; HRMS (ESI) for C<sub>25</sub>H<sub>24</sub>NO<sub>2</sub><sup>+</sup> (M+H)<sup>+</sup>: calcd. 370.1802, found 370.1804.

**(E)-3-(1,2-Bis(4-isopropylphenyl)-2-phenylvinyl)oxazolidin-2-one (**4b**):**

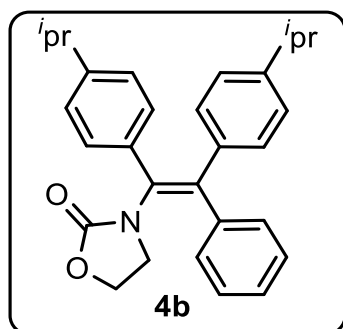

**4b** (50 mg, 40%) as yellow solid; M.P = 175–178 °C;  $R_f$  = 0.6 (30% EtOAc/Hex); <sup>1</sup>H NMR (500 MHz, CDCl<sub>3</sub>):  $\delta$  7.36–7.31 (m, 2H), 7.30–7.26 (m, 3H), 7.11 (dt,  $J$  = 8.0, 2.0 Hz, 2H), 7.02 (d,  $J$  = 8.5 Hz, 2H), 6.97–6.91 (m, 4H), 4.18 (t,  $J$  = 8.5 Hz, 2H), 3.51 (t,  $J$  = 8.0 Hz, 2H), 2.87–2.77 (m, 2H), 1.20 (d,  $J$  = 7.0 Hz, 6H), 1.19 (d,  $J$  = 7.0 Hz, 6H); <sup>13</sup>C NMR (101 MHz, CDCl<sub>3</sub>):

$\delta$  155.9, 148.6, 147.8, 142.1, 140.3, 138.0, 133.5, 131.6, 130.8, 129.4, 129.0, 128.3, 127.5, 126.2, 125.8, 62.0, 46.2, 33.7, 33.6, 23.8, 23.7; IR (Neat):  $\nu_{\max}$  1758, 1408, 1203, 1150, 1072, 758  $\text{cm}^{-1}$ ; HRMS (ESI) for  $\text{C}_{29}\text{H}_{32}\text{NO}_2^+$  ( $\text{M}+\text{H}$ ) $^+$ : calcd. 426.2428, found 426.2431.

**(E)-3-(2-Phenyl-1,2-bis(4-(trifluoromethoxy)phenyl)vinyl)oxazolidin-2-one (4c):**

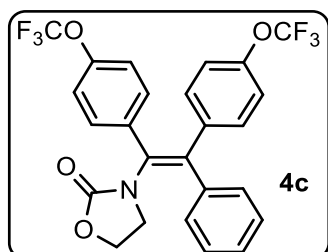

**4c** (47 mg, 30%) as yellow solid; M.P = 185–187 °C;  $R_f$  = 0.5 (30% EtOAc/Hex);  $^1\text{H}$  NMR (500 MHz,  $\text{CDCl}_3$ ):  $\delta$  7.38 (tt,  $J$  = 7.5, 2.0 Hz, 2H), 7.33 (tt,  $J$  = 7.5, 3.0 Hz, 1H), 7.27–7.25 (m, 2H), 7.25 (t,  $J$  = 1.5 Hz, 1H), 7.21 (dt,  $J$  = 9.0, 2.5 Hz, 2H), 7.07–7.05 (m, 1H), 7.03 (dt,  $J$  = 9.0, 2.5 Hz, 3H), 6.98 (d,  $J$  = 8.0 Hz, 2H), 4.22 (t,  $J$  = 8.0 Hz, 2H), 3.50 (t,  $J$  = 8.0 Hz, 2H);  $^{13}\text{C}$  NMR (126 MHz,  $\text{CDCl}_3$ ):  $\delta$  155.7, 148.8, 148.5, 140.8, 140.0, 138.8, 134.6, 132.3, 131.7, 131.1, 128.9, 128.7, 128.3, 120.7, 120.4, 120.3 (q,  $J$  = 258.3 Hz, 1C), 62.2, 45.9;  $^{19}\text{F}$  NMR (400 MHz,  $\text{CDCl}_3$ ):  $\delta$  -57.81, -57.86; IR (Neat):  $\nu_{\max}$  1750, 1505, 1403, 1203, 1151, 762, 700  $\text{cm}^{-1}$ ; HRMS (ESI) for  $\text{C}_{25}\text{H}_{19}\text{F}_6\text{NO}_4^+$  ( $\text{M}+\text{H}$ ) $^+$ : calcd. 510.1135, found 510.1137.

**(E)-3-(1,2-Bis(3,4-dimethoxyphenyl)-2-phenylvinyl)oxazolidin-2-one (4d):**

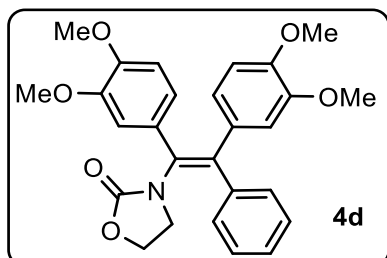

**4d** (24 mg, 35%) as yellow solid; M.P = 115–117 °C;  $R_f$  = 0.7 (30% EtOAc/Hex);  $^1\text{H}$  NMR (500 MHz,  $\text{CDCl}_3$ ):  $\delta$  7.38–7.33 (m, 2H), 7.31–7.27 (m, 3H), 6.82 (dd,  $J$  = 8.5, 2.5 Hz, 1H), 6.72 (d,  $J$  = 8.0 Hz, 1H), 6.68 (d,  $J$  = 2.0 Hz, 1H), 6.64 (d,  $J$  = 8.0 Hz, 1H), 6.59–6.54 (m, 2H), 4.20 (t,  $J$  = 8.0 Hz, 2H), 3.84 (s, 3H), 3.81 (s, 3H), 3.56 (s, 3H), 3.55–3.50 (m, 5H);  $^{13}\text{C}$  NMR (126 MHz,  $\text{CDCl}_3$ ):  $\delta$  155.8, 148.8, 148.5, 148.31, 148.26, 141.7, 139.4, 133.5, 131.1, 129.0, 128.9, 128.4, 127.7, 123.6, 121.6, 114.3, 113.2, 110.8, 110.6, 62.1, 55.79, 55.75, 55.70, 55.66, 46.2; IR (Neat)  $\nu_{\max}$  1748, 1510, 1404, 1260, 1137, 1024, 732  $\text{cm}^{-1}$ ; HRMS (ESI) for  $\text{C}_{27}\text{H}_{28}\text{NO}_6^+$  ( $\text{M}+\text{H}$ ) $^+$ : calcd. 462.1911, found 462.1916.

**(E)-3-(1,2-Bis(3-nitrophenyl)-2-phenylvinyl)oxazolidin-2-one (4e):**

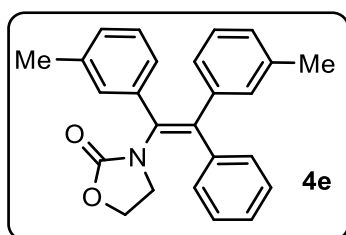

**4e** (21 mg, 38%) as yellow solid; M.P = 183–185 °C;  $R_f$  = 0.5 (30% EtOAc/Hex);  $^1\text{H}$  NMR (500 MHz,  $\text{CDCl}_3$ ):  $\delta$  7.35 (tt,  $J$  = 7.5, 1.5 Hz, 2H), 7.31–7.29 (m, 1H), 7.29–7.26 (m, 2H), 7.05 (t,  $J$  = 7.5 Hz, 1H), 7.02–6.93 (m, 5H), 6.85–6.80 (m, 2H), 4.20 (t,

$J = 8.0$  Hz, 2H), 3.52 (t,  $J = 8.0$  Hz, 2H), 2.21 (s, 3H), 2.15 (s, 3H);  $^{13}\text{C}$  NMR (101 MHz,  $\text{CDCl}_3$ ):  $\delta$  155.9, 141.8, 140.8, 140.5, 137.7, 137.3, 136.0, 132.0, 131.5, 129.9, 128.9, 128.8, 128.4, 128.1, 127.9, 127.6, 126.9, 62.1, 46.1, 21.3, 21.2; IR (Neat):  $\nu_{\text{max}}$  1748, 1401, 1220, 1036, 699  $\text{cm}^{-1}$ . HRMS (ESI) for  $\text{C}_{25}\text{H}_{24}\text{NO}_2^+$  ( $\text{M}+\text{H}$ ) $^+$ : calcd.370.1802, found 370.1805.

**(E)-3-(1,2-Bis(3-nitrophenyl)-2-phenylvinyl)oxazolidin-2-one (4f):**

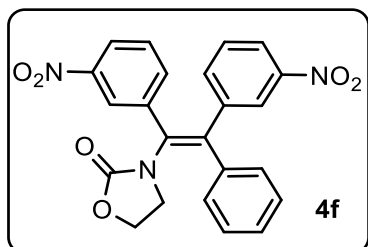

**4f** (17 mg, 26%) as yellow solid; M.P = 195–197 °C;  $R_f = 0.2$  (30% EtOAc/Hex);  $^1\text{H}$  NMR (500 MHz,  $\text{CDCl}_3$ ):  $\delta$  8.10–8.05 (m, 2H), 8.04 (dt,  $J = 7.5, 3.0$  Hz, 1H), 7.87–7.84 (m, 1H), 7.53–7.49 (m, 1H), 7.45–7.41 (m, 3H), 7.41–7.36 (m, 2H), 7.36–7.32 (m, 2H), 7.28 (d,  $J = 2.0$  Hz, 1H), 4.29 (t,  $J = 8.0$  Hz,

2H), 3.52 (t,  $J = 8.5$  Hz, 2H);  $^{13}\text{C}$  NMR (126 MHz,  $\text{CDCl}_3$ ):  $\delta$  155.6, 148.3, 148.1, 141.6, 139.48, 139.45, 137.7, 136.9, 135.8, 132.6, 129.6, 129.4, 129.2, 129.1, 129.0, 125.6, 124.2, 123.5, 122.8, 62.6, 45.8; IR (Neat):  $\nu_{\text{max}}$  1752, 1526, 1348, 1265, 733  $\text{cm}^{-1}$ . HRMS (ESI) for  $\text{C}_{23}\text{H}_{18}\text{N}_3\text{O}_6^+$  ( $\text{M}+\text{H}$ ) $^+$ : calcd.432.1190, found 432.1183.

**Diethyl 3,3'-(1-(2-oxooxazolidin-3-yl)-2-phenylethene-1,2-diyl)(E)-dibenzoate (4g):**

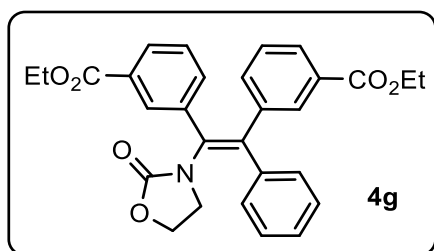

**4g** (31 mg, 43%) as yellow solid; M.P = 158–160 °C;  $R_f = 0.2$  (30% EtOAc/Hex);  $^1\text{H}$  NMR (500 MHz,  $\text{CDCl}_3$ ):  $\delta$  7.86 (tt,  $J = 9.0, 1.5$  Hz, 2H), 7.82 (dt,  $J = 6.5, 2.0$  Hz, 1H), 7.70–7.68 (m, 1H), 7.37 (tt,  $J = 7.5, 1.5$  Hz, 2H), 7.35–7.32 (m, 2H), 7.28 (d,  $J = 1.5$  Hz, 1H), 7.27–7.26

(m, 1H), 7.24–7.18 (m, 3H), 4.30 (q,  $J = 7.5$  Hz, 2H), 4.27–4.22 (m, 4H), 3.52 (t,  $J = 8.0$  Hz, 2H), 1.32 (t,  $J = 7.5$  Hz, 3H), 1.29 (t,  $J = 7.0$  Hz, 3H);  $^{13}\text{C}$  NMR (126 MHz,  $\text{CDCl}_3$ ):  $\delta$  166.1, 166.0, 155.7, 140.7, 140.6, 140.2, 136.4, 135.3, 134.3, 132.4, 131.9, 130.7, 130.4, 130.3, 129.3, 129.0, 128.7, 128.5, 128.4, 128.3, 128.1, 62.3, 61.0, 60.9, 46.0, 14.19, 14.15; IR (Neat):  $\nu_{\text{max}}$  1752, 1713, 1400, 1247, 1105, 733  $\text{cm}^{-1}$ ; HRMS (ESI) for  $\text{C}_{29}\text{H}_{27}\text{NO}_6$  ( $\text{M}+\text{Na}$ ) $^+$ : calcd. 508.1731, found 508.1735.

**(E)-3-(1,2-Bis(3-chlorophenyl)-2-phenylvinyl)oxazolidin-2-one (4h):**

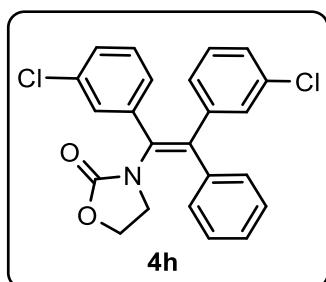

**4h** (17 mg, 28%) as yellow solid; M.P = 190–193 °C;  $R_f$  = 0.4 (30% EtOAc/Hex);  $^1\text{H NMR}$  (500 MHz, DMSO- $\text{D}_6$ ):  $\delta$  7.42 (t,  $J$  = 8.0 Hz, 2H), 7.36 (tt,  $J$  = 7.5, 2.5 Hz, 1H), 7.30 (dt,  $J$  = 8.0, 2.0 Hz, 1H), 7.28 (d,  $J$  = 7.0 Hz, 2H), 7.25 (d,  $J$  = 8.0 Hz, 1H), 7.23 (t,  $J$  = 2.0 Hz, 1H), 7.21–7.19 (m, 2H), 7.16 (dt,  $J$  = 7.5, 1.5 Hz, 1H), 6.98 (t,  $J$  = 2.0 Hz, 1H), 6.94 (dt,  $J$  = 7.5, 1.5 Hz, 1H), 4.22 (t,  $J$  = 8.5 Hz, 2H), 3.47 (t,  $J$  = 8.0 Hz, 2H);  $^{13}\text{C NMR}$  (126 MHz, DMSO- $\text{D}_6$ ):  $\delta$  155.7, 143.1, 140.9, 138.7, 133.3, 133.2, 132.9, 130.6, 130.54, 130.48, 129.8, 129.7, 129.22, 129.15, 128.9, 128.62, 128.58, 127.9, 63.0, 45.8; IR (Neat):  $\nu_{\text{max}}$  1751, 1401, 1264, 1079, 733  $\text{cm}^{-1}$ . HRMS (ESI) for  $\text{C}_{23}\text{H}_{18}\text{Cl}_2\text{NO}_2^+$  ( $\text{M}+\text{H}$ ) $^+$ : calcd.410.0709, found 410.0707.

**(E)-3-(1,2-Bis(4-chlorophenyl)-2-phenylvinyl)oxazolidin-2-one (4i):**

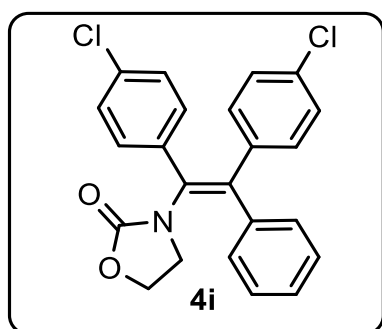

**4i** (21 mg, 35%) as yellow solid; M.P = 272–274 °C;  $R_f$  = 0.4 (30% EtOAc/Hex);  $^1\text{H NMR}$  (500 MHz,  $\text{CDCl}_3$ ):  $\delta$  7.39–7.31 (m, 3H), 7.25–7.22 (m, 2H), 7.19 (dt,  $J$  = 8.5, 2.5 Hz, 2H), 7.14–7.09 (m, 4H), 6.94 (dt,  $J$  = 8.5, 2.5 Hz, 2H), 4.21 (t,  $J$  = 8.0 Hz, 2H), 3.48 (t,  $J$  = 8.5 Hz, 2H);  $^{13}\text{C NMR}$  (101 MHz,  $\text{CDCl}_3$ ):  $\delta$  155.7, 140.9, 139.8, 138.8, 134.5, 134.1, 133.5, 132.2, 131.6, 130.8, 128.9, 128.8, 128.7, 128.4, 128.2, 62.2, 45.9; IR (Neat):  $\nu_{\text{max}}$  1750, 1401, 1264, 1088, 736  $\text{cm}^{-1}$ ; HRMS (ESI) for  $\text{C}_{23}\text{H}_{18}\text{Cl}_2\text{NO}_2$  ( $\text{M}+\text{H}$ ) $^+$ : calcd. 410.0709, found 410.0711.

**(E)-3-(1,2-Bis(4-bromophenyl)-2-phenylvinyl)oxazolidin-2-one (4j):**

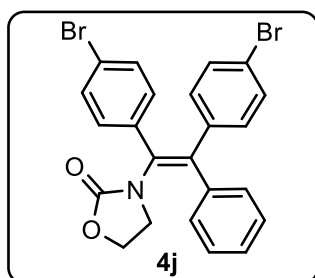

**4j** (29 mg, 36%) as yellow solid; M.P = 270–272 °C;  $R_f$  = 0.4 (30% EtOAc/Hex);  $^1\text{H NMR}$  (500 MHz,  $\text{CDCl}_3$ ):  $\delta$  7.44–7.40 (m, 1H), 7.38–7.34 (m, 3H), 7.34–7.31 (m, 2H), 7.29–7.27 (m, 1H), 7.25–7.21 (m, 2H), 7.06 (dt,  $J$  = 8.5, 2.5 Hz, 2H), 6.88 (dt,  $J$  = 8.5, 2.5 Hz, 2H), 4.21 (t,  $J$  = 8.5 Hz, 2H), 3.48 (t,  $J$  = 8.0 Hz, 2H);  $^{13}\text{C NMR}$  (101 MHz, DMSO- $\text{D}_6$ ):  $\delta$  155.6, 141.3, 140.3, 138.8, 135.8, 133.2, 132.6, 132.2, 131.7, 129.2, 129.1, 128.5, 121.8, 121.2, 62.9, 45.8, 29.5; IR (Neat)  $\nu_{\text{max}}$  1750, 1401, 1222, 1070, 804, 706  $\text{cm}^{-1}$ ; HRMS (ESI) for  $\text{C}_{23}\text{H}_{18}\text{Br}_2\text{NO}_2$  ( $\text{M}+\text{H}$ ) $^+$ : calcd. 497.9699, found 497.9697.

**X-ray crystallography:**<sup>3</sup>

X-ray reflections for **3c** were collected on Rigaku Oxford CCD diffractometer using Mo-K $\alpha$ , radiation. Data reduction was performed using CrysAlisPro (version 1.171.33.55). Apex 2 and SHELXL 97 program were used to solve and refine the data. All non-hydrogen atoms were refined anisotropically, and C–H hydrogens were fixed. The crystal has been grown by slow evaporation of CH<sub>2</sub>Cl<sub>2</sub> and hexane.

**Table S3.** Crystallographic Data for Compound **3c**

|                       |                                                   |                                          |               |
|-----------------------|---------------------------------------------------|------------------------------------------|---------------|
| <b>Compound</b>       | <b>3c</b>                                         | $V [\text{\AA}^3]$                       | 653.00 (8)    |
| formula               | C <sub>34</sub> H <sub>31</sub> NO <sub>4</sub> S | $Z$                                      | 4             |
| Formula weight        | 549.66                                            | $\rho_{\text{calcd}} [\text{g cm}^{-3}]$ | 1.252         |
| crystal system        | Monoclinic                                        | $\mu [\text{mm}^{-1}]$                   | 0.150         |
| space group           | P 21/n                                            | total reflns                             | 35706         |
| T [K]                 | 258 K                                             | unique reflns                            | 6241          |
| a [ $\text{\AA}$ ]    | 13.3009(3)                                        | observed                                 | 3511          |
| b [ $\text{\AA}$ ]    | 11.1099 (3)                                       | $R_1 [I > 2\sigma(I)]$                   | 0.0568 (3511) |
| c [ $\text{\AA}$ ]    | 19.7682 (5)                                       | wR2 [all]                                | 0.1660 (6241) |
| $\alpha$ [ $^\circ$ ] | 90                                                | GOF                                      | 1.020         |
| $\beta$ [ $^\circ$ ]  | 93.282 (2)                                        | Diffractometer                           | Rigaku Oxford |
| $\gamma$ [ $^\circ$ ] | 90                                                | CCDC Number                              | CCDC 2262318  |

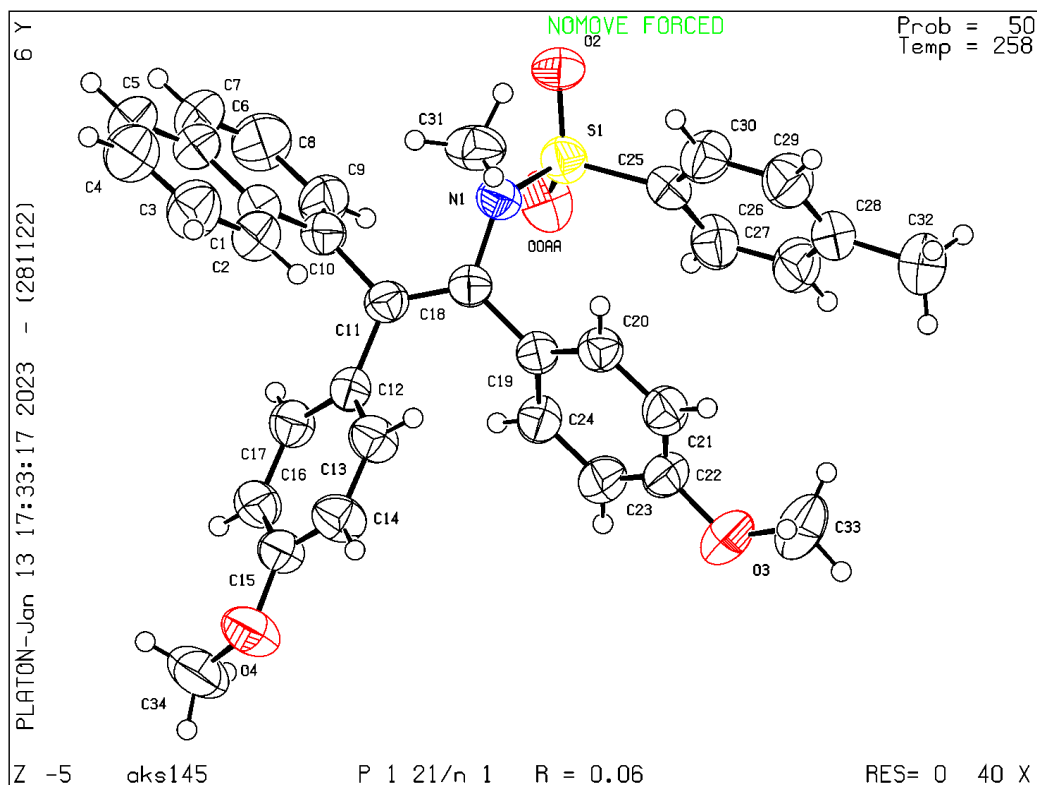

**Figure S1.** Molecular structure of compound **3c**, (Oxygen (red), nitrogen (blue), and sulphur (yellow)). The ellipsoid contour % probability level is 50%.

X-ray reflections for **4c** were collected on Rigaku Oxford CCD diffractometer using Mo-K $\alpha$ , radiation. Data reduction was performed using CrysAlisPro (version 1.171.33.55). Apex 2 and SHELXL 97 program were used to solve and refine the data. All non-hydrogen atoms were refined anisotropically, and C–H hydrogens were fixed. The crystal has been grown by slow evaporation of CH<sub>2</sub>Cl<sub>2</sub> and hexane.

**Table S4.** Crystallographic Data for Compound **4c**

|                       |                                                                |                                          |               |
|-----------------------|----------------------------------------------------------------|------------------------------------------|---------------|
| <b>Compound</b>       | <b>4c</b>                                                      | $V [\text{\AA}^3]$                       | 2320.85 (11)  |
| formula               | C <sub>25</sub> H <sub>17</sub> F <sub>6</sub> NO <sub>4</sub> | Z                                        | 4             |
| Formula weight        | 509.40                                                         | $\rho_{\text{calcd}} [\text{g cm}^{-3}]$ | 1.458         |
| crystal em            | Monoclinic                                                     | $\mu [\text{mm}^{-1}]$                   | 0.130         |
| space group           | P 21/c                                                         | total reflns                             | 26409         |
| T [K]                 | 298 K                                                          | unique reflns                            | 4087          |
| a [ $\text{\AA}$ ]    | 15.0723 (4)                                                    | observed                                 | 2930          |
| b [ $\text{\AA}$ ]    | 9.1985 (3)                                                     | $R_1 [I > 2\sigma(I)]$                   | 0.0876 (2930) |
| c [ $\text{\AA}$ ]    | 16.7522 (4)                                                    | wR2 [all]                                | 0.2919 (4087) |
| $\alpha$ [ $^\circ$ ] | 90                                                             | GOF                                      | 1             |



|              |            |                |               |
|--------------|------------|----------------|---------------|
| $\beta$ [°]  | 92.202 (2) | Diffractometer | Rigaku Oxford |
| $\gamma$ [°] | 90         | CCDC Number    | CCDC 2262319  |

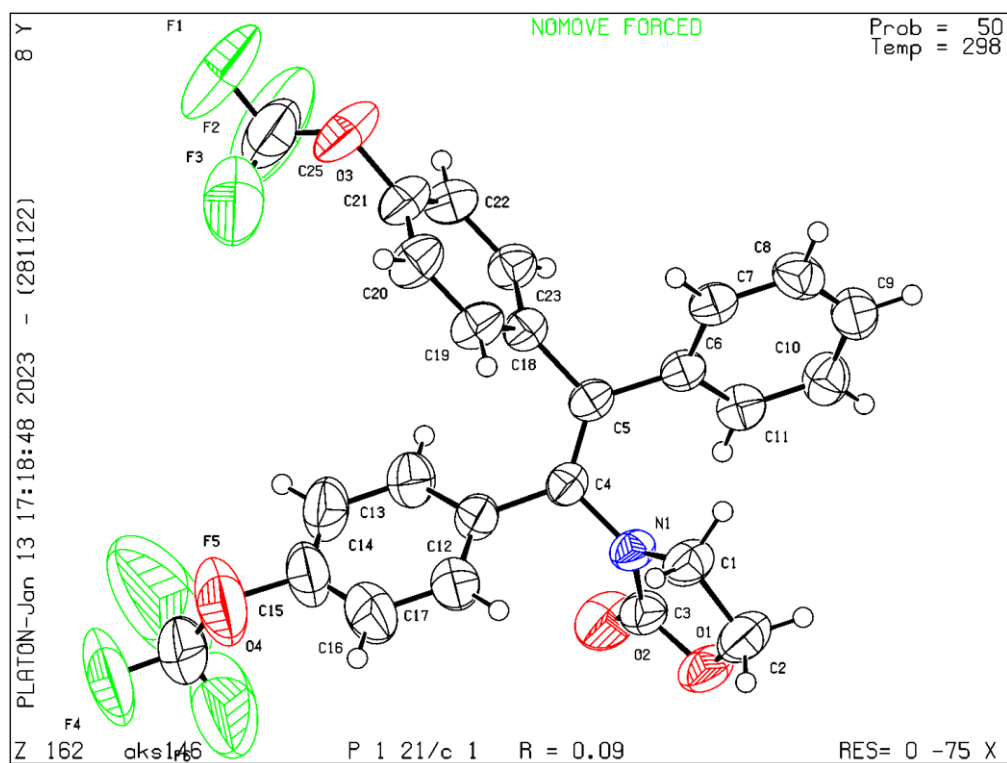

**Figure S2.** Molecular structure of compound **4c**, (Oxygen (red), nitrogen (blue), and fluorine (green)). The ellipsoid contour % probability level is 50%.

#### Reference:

1. S. Dutta, S. Yang, R. Vanjari, R. K. Mallick, V. Gandon, A. K. Sahoo, *Angew. Chem.Int. Ed.*, 2020, **59**, 10785.
2. M. Chen, N. Sun, H. Chen, Y. Liu, *Chem. Commun.*, 2016, **52**, 6324.
3. (a) SAINT-Plus, version 6.45, Bruker AXS Inc. Madison, WI, 2003. (b) G. M. Sheldrick, SADABS, Program for Empirical Absorption Correction of Area Detector Data, University of Gottingen, Germany, 1997. (c) SMART (version 5.625), SHELX-TL (version 6.12), Bruker AXS Inc. Madison, WI, 2000; (d) G. M. Sheldrick, SHELXS-97, SHELXL-97, University of Gottingen, Germany, 1997. (e) O. V. Dolomanov, A. J. Blake, N. R. Champness, M. Schroder, *J. Appl. Cryst.* 2003, **36**, 1283.

7.300  
7.297  
7.293  
7.289  
7.285  
7.279  
7.277  
7.266  
7.260  
7.250  
7.234  
7.220  
7.104  
7.091  
7.046  
7.030  
6.960  
6.944  
6.846  
6.829  
6.782  
6.768  
6.765  
6.755  
6.750  
6.745  
6.574  
6.567  
6.556  
6.549  
4.269  
4.240  
3.991  
3.962  
3.741  
3.698  
2.382

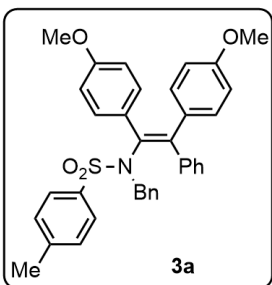

Current Data Parameters  
NAME ARADHANA SAHOO ASCEND 500  
EXPNO 225  
PROCNO 1

F2 - Acquisition Parameters  
Date\_ 20230614  
Time 16.21 h  
INSTRUM spect  
PROBHD z119470\_0291 ( (   
PULPROG zg30  
TD 65536  
SOLVENT CDCl3  
NS 64  
DS 2  
SWH 10000.000 Hz  
FIDRES 0.305176 Hz  
AQ 3.2767999 sec  
RG 69.79  
DW 50.000 usec  
DE 6.50 usec  
TE 302.2 K  
D1 1.0000000 sec  
TDO 1  
SF01 500.3720898 MHz  
NUC1 1H  
P1 10.00 usec  
PLW1 23.23100090 W

F2 - Processing parameters  
SI 65536  
SF 500.3690114 MHz  
WDW EM  
SSB 0  
LB 0.30 Hz  
GB 0  
PC 1.00

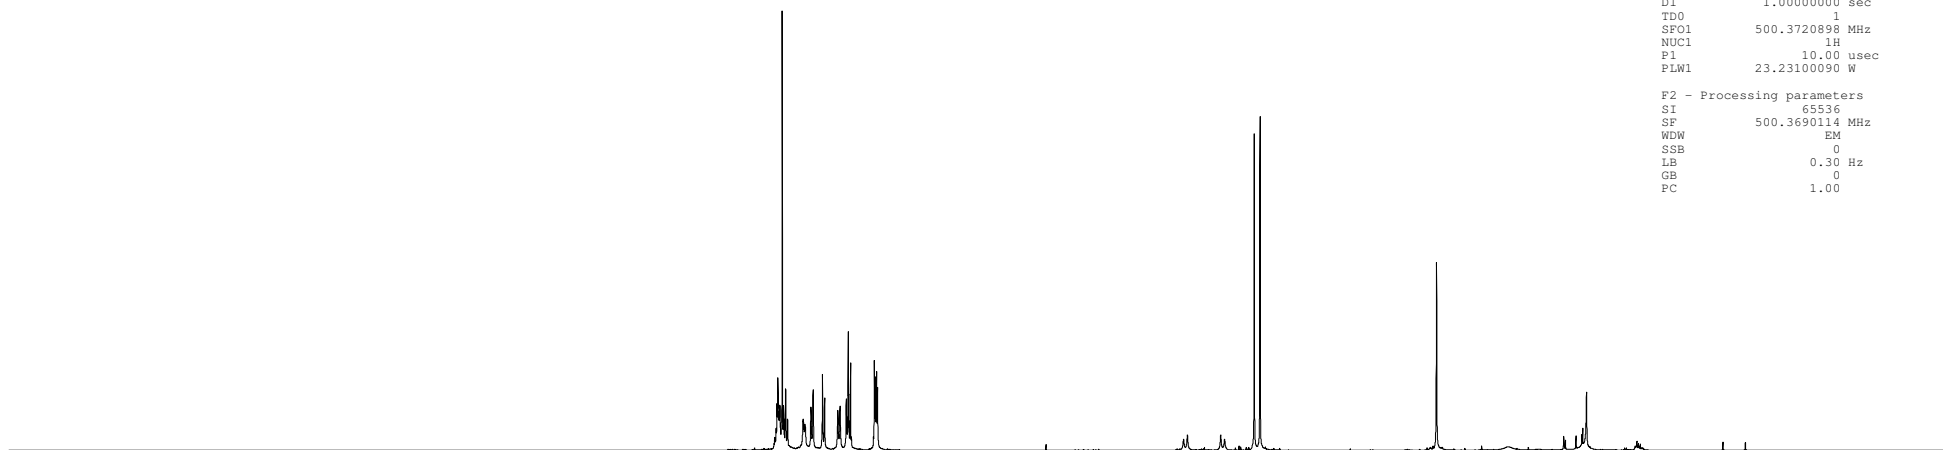

12 11 10 9 8 7 6 5 4 3 2 1 0 ppm

2.02  
1.09  
3.01  
2.09  
2.10  
2.05  
2.09  
1.03  
3.03  
4.02  
1.00  
1.01  
3.05  
3.04  
3.04

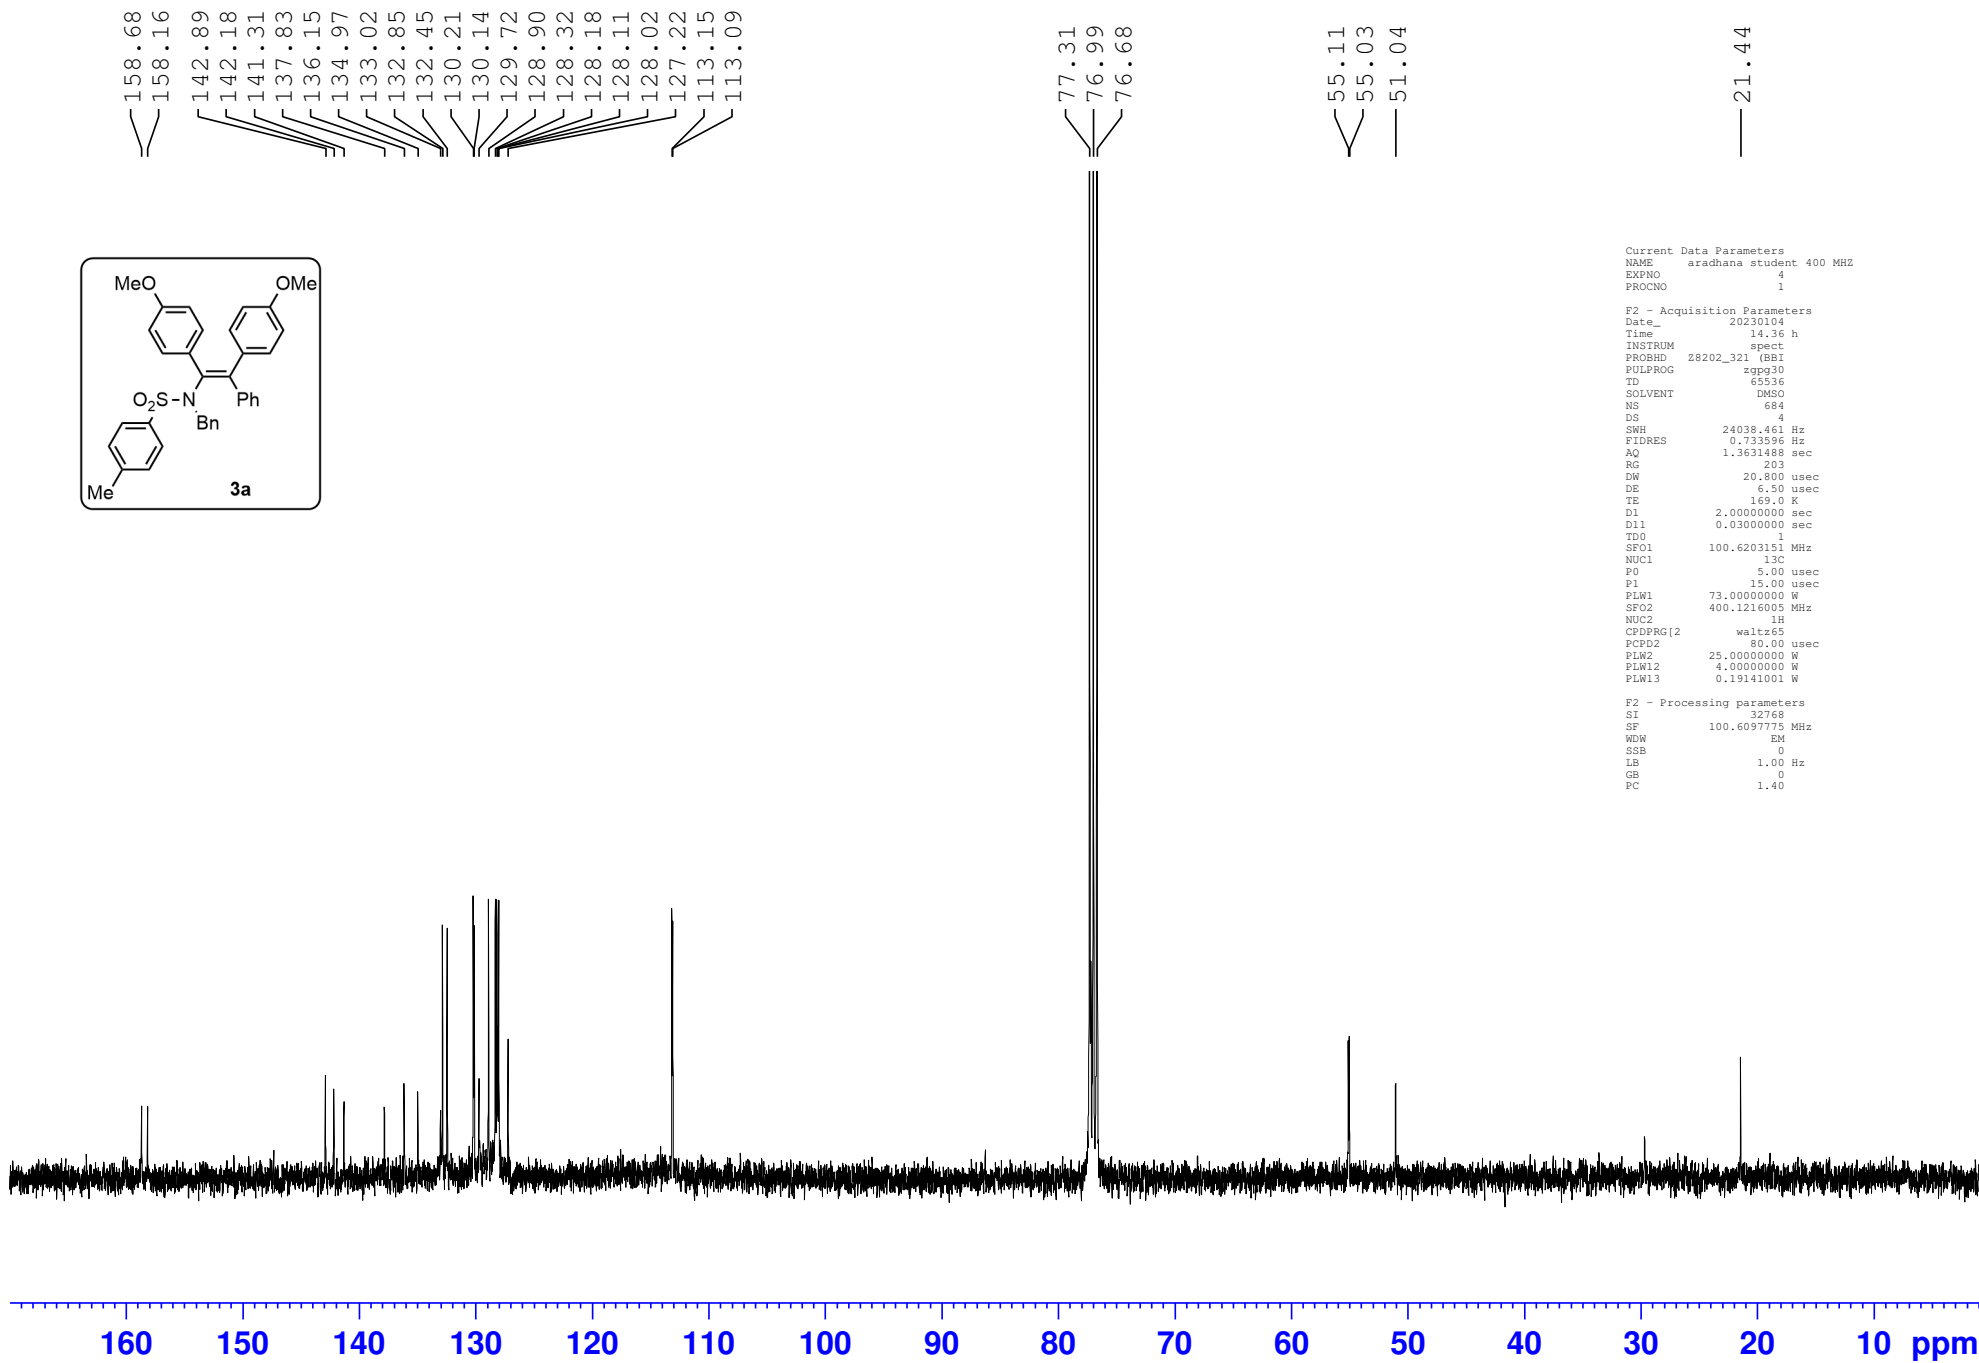

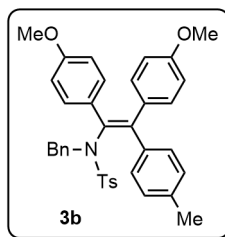

7.344  
7.339  
7.329  
7.311  
7.296  
7.283  
7.159  
7.142  
7.132  
7.116  
7.003  
6.986  
6.969  
6.853  
6.839  
6.639  
6.579  
6.561  
6.533  
6.515

4.318  
4.289  
3.879  
3.850  
3.666  
3.642  
3.336  
2.514  
2.511  
2.507  
2.503  
2.500  
2.369  
2.364

Current Data Parameters  
NAME ARADHANA SAHOO ASCEND 500  
EXPNO 227  
PROCNO 1

F2 - Acquisition Parameters  
Date\_ 20230619  
Time 12.04 h  
INSTRUM spect  
PROBHD Z119470\_0291 (1  
PULPROG zg30  
TD 65536  
SOLVENT DMSO  
NS 64  
DS 2  
SWH 10000.000 Hz  
FIDRES 0.305176 Hz  
AQ 3.2767999 sec  
RG 31.25  
DW 50.000 usec  
DE 6.50 usec  
TE 301.6 K  
D1 1.00000000 sec  
TDO 1  
SFO1 500.3720898 MHz  
NUC1 1H  
P1 10.00 usec  
PLW1 23.23100090 W

F2 - Processing parameters  
SI 65536  
SF 500.3690000 MHz  
WDW EM  
SSB 0  
LB 0.30 Hz  
GB 0  
PC 1.00

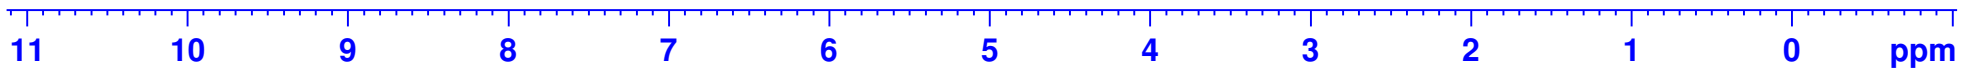

1.03  
2.14  
2.09  
2.01  
3.03  
0.95  
2.01  
4.09  
2.10  
2.06

1.00  
1.06  
3.03  
3.08

6.02

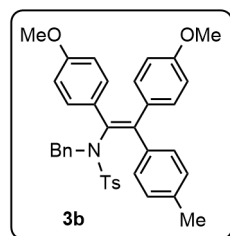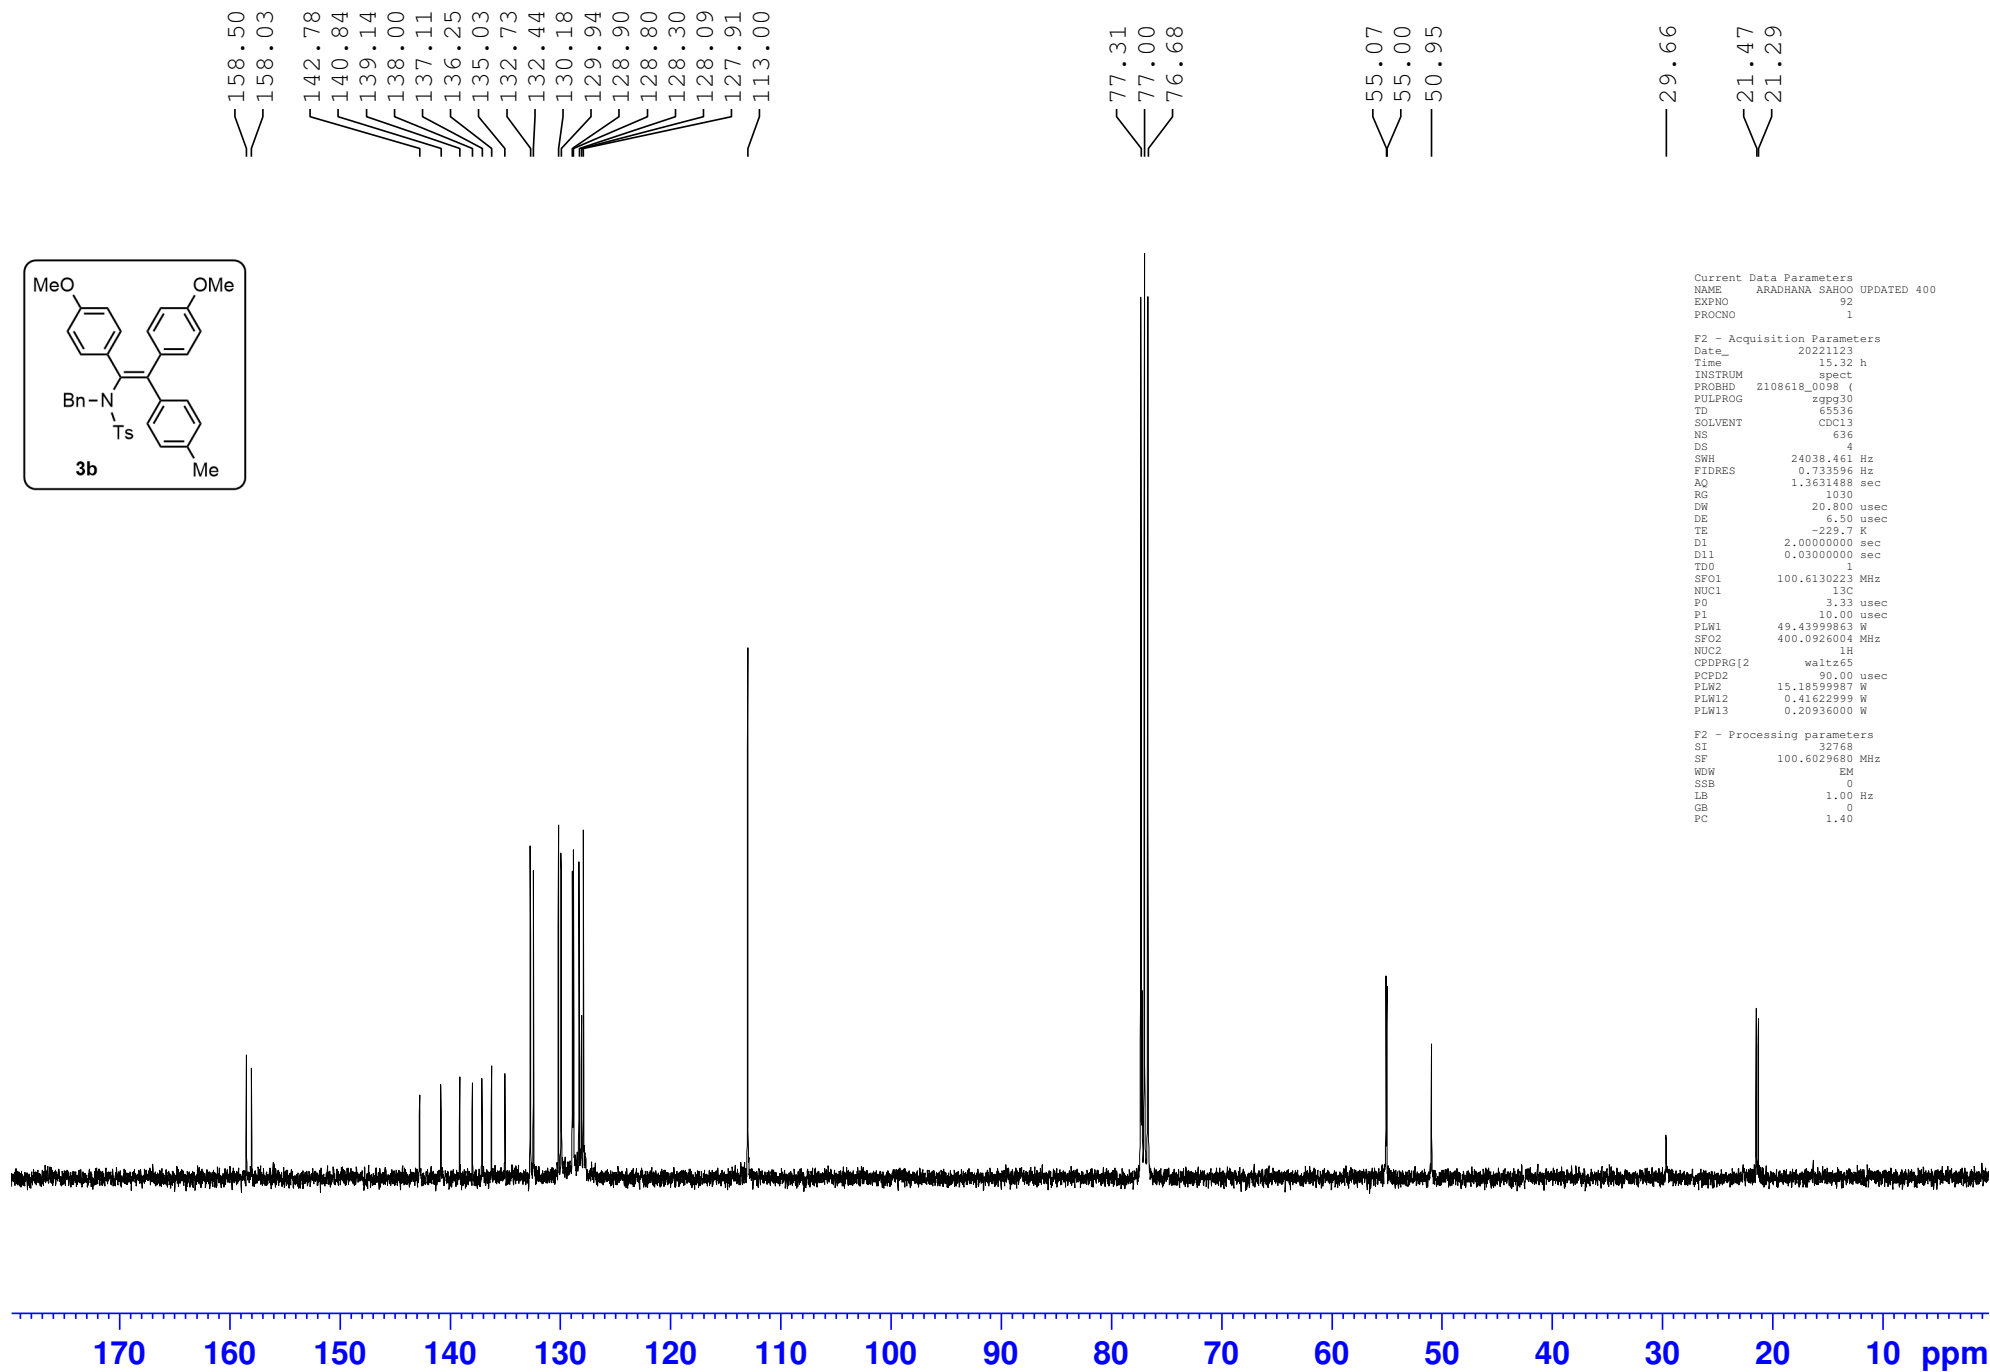

Current Data Parameters  
NAME ARADHANA SAHOO UPDATED 400  
EXPNO 92  
PROCNO 1

F2 - Acquisition Parameters

Date\_ 20221123  
Time 15.32 h  
INSTRUM spect  
PROBHD Z108618\_0098 (   
PULPRG zgpg30  
TD 6536  
SOLVENT CDCl3  
NS 636  
DS 4  
SWH 24038.461 Hz  
FIDRES 0.733596 Hz  
AQ 1.3631488 sec  
RG 1030  
DW 20.800 usec  
DE 6.50 usec  
TE -229.7 K  
D1 2.00000000 sec  
D11 0.03000000 sec  
TD0 1  
SFO1 100.6130223 MHz  
NUC1 13C  
PO 3.33 usec  
P1 10.00 usec  
PLW1 49.43999863 W  
SFO2 400.0926004 MHz  
NUC2 1H  
CPDPRG(2) waltz65  
PCPD2 90.00 usec  
PLW2 15.1859987 W  
PLW12 0.41622999 W  
PLW13 0.20936000 W

F2 - Processing parameters

SI 32768  
SF 100.6029680 MHz  
WDW EM  
SSB 0  
LB 1.00 Hz  
GB 0  
PC 1.40

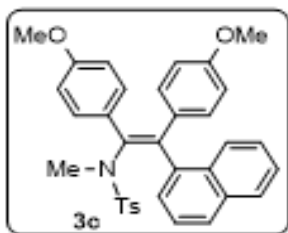

7.902  
7.850  
7.722  
7.693  
7.546  
7.509  
7.437  
7.421  
7.407  
7.356  
7.344  
7.329  
7.139  
7.077  
6.872  
6.860  
6.855  
6.738  
6.615  
6.606  
6.598

3.729  
3.586  
3.409

2.626  
2.504  
2.247

Current Data Parameters  
NAME ARADHANA SAHO ASCEND 500  
EXPNO 218  
PROCNO 1

F2 - Acquisition Parameters  
Date\_ 20230515  
Time 12.27 h  
INSTRUM spect  
PROBHD z119470\_0291 (  
PULPROG zg30  
TD 65536  
SOLVENT DMSO  
NS 32  
DS 2  
SWH 10000.000 Hz  
FIDRES 0.305176 Hz  
AQ 3.2767999 sec  
RG 15.92  
DW 50.000 usec  
DE 6.50 usec  
TE 302.1 K  
D1 1.00000000 sec  
TD0 1  
SFO1 500.3720898 MHz  
NUC1 1H  
P1 10.00 usec  
PLW1 23.23100090 W

F2 - Processing parameters  
SI 65536  
SF 500.3690000 MHz  
WDW EM  
SSB 0  
LB 0.30 Hz  
GB 0  
PC 1.00

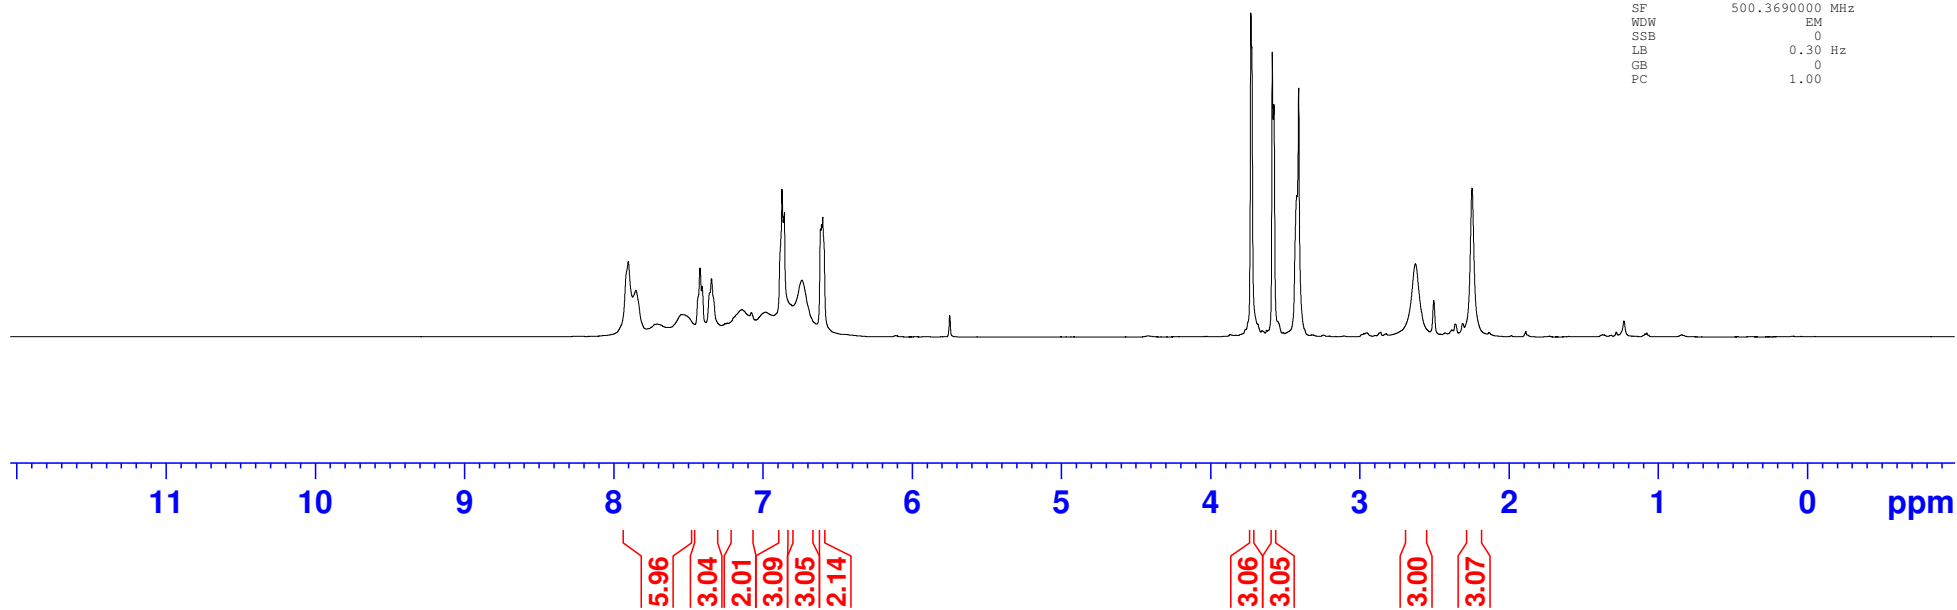

159.12  
158.32  
142.87  
139.01  
136.93  
134.19  
133.56  
132.34  
131.52  
129.45  
129.27  
128.71  
128.25  
126.93  
126.45  
126.04  
113.87  
113.81

55.52  
55.27  
40.50  
40.34  
40.17  
40.00  
39.84  
39.67  
39.50  
37.47  
29.50  
21.31

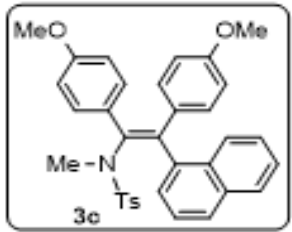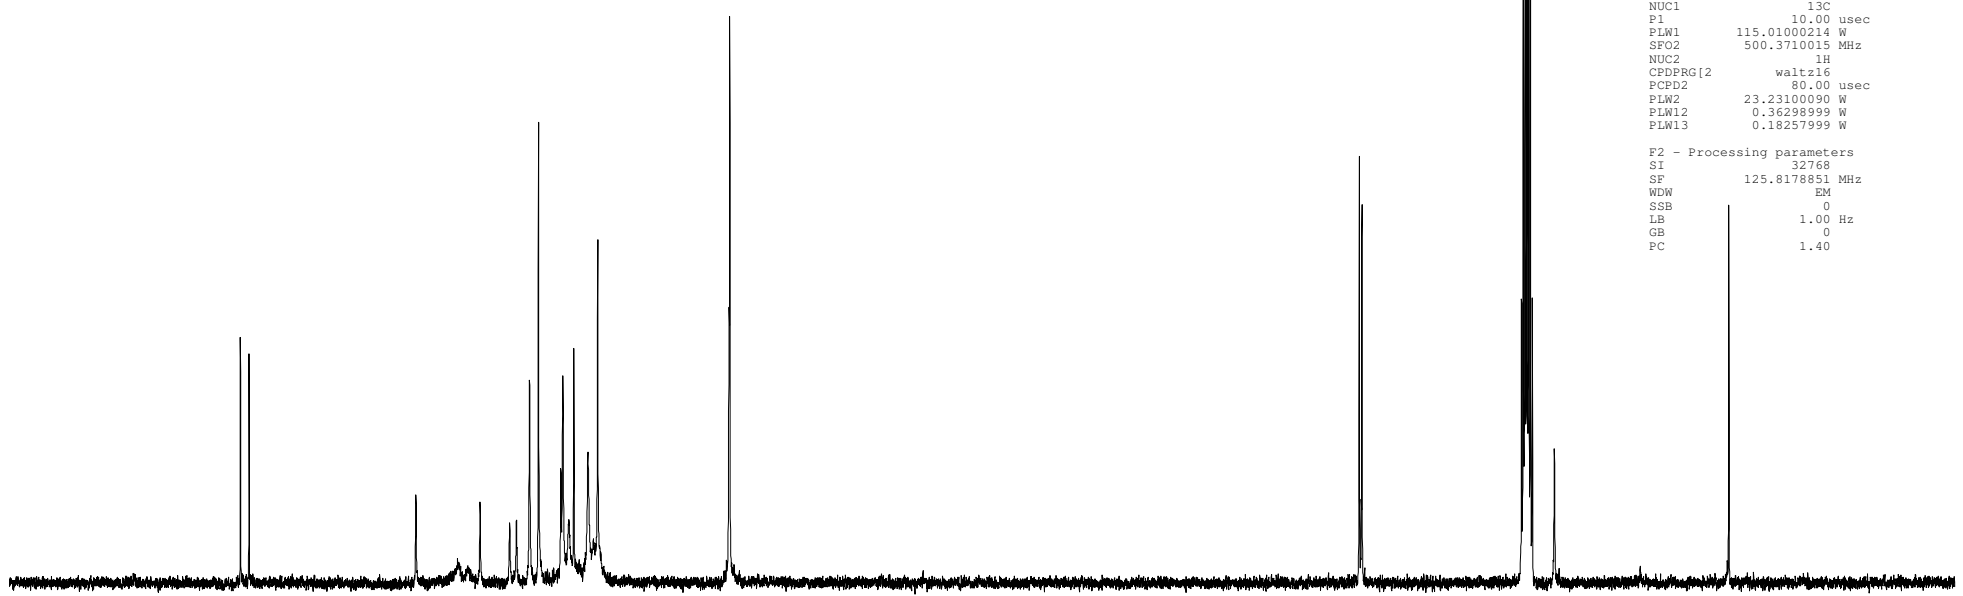

```

Current Data Parameters
NAME      ARADHANA SAHOO ASCEND 500
EXPNO    219
PROCNO    1

F2 - Acquisition Parameters
Date_     20230515
Time      10.47 h
INSTRUM   spect
PROBHD    Z119470_0291 (
PULPROG   zgpg30
TD         65536
SOLVENT   DMSO
NS         457
DS         4
SWH        29761.904 Hz
FIDRES     0.908261 Hz
AQ         1.1010048 sec
RG         192.83
DW         16.800 usec
DE         6.50 usec
TE         301.1 K
D1         2.00000000 sec
D11        0.03000000 sec
TD0        1
SFO1       125.8304669 MHz
NUC1       13C
P1         10.00 usec
PLW1       115.01000214 W
SFO2       500.3710015 MHz
NUC2       1H
CPDPRG[2] waltz16
PCPD2      80.00 usec
PLW2       23.23100090 W
PLW12      0.36298999 W
PLW13      0.18257999 W

F2 - Processing parameters
SI         32768
SF         125.8178851 MHz
WDW        EM
SSB        0
LB         1.00 Hz
GB         0
PC         1.40
  
```

170 160 150 140 130 120 110 100 90 80 70 60 50 40 30 20 10 ppm

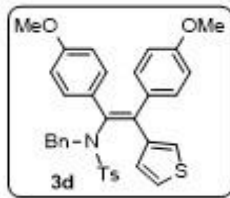

7.651  
7.645  
7.641  
7.635  
7.399  
7.385  
7.376  
7.361  
7.348  
7.344  
7.241  
7.225  
7.215  
7.212  
7.209  
7.206  
7.178  
7.161  
7.125  
7.123  
7.115  
7.113  
7.062  
7.048  
7.046  
7.033  
7.030  
6.749  
6.730  
6.719  
6.701  
6.492  
4.589  
4.560  
4.023  
3.994  
3.709  
3.695  
3.417  
2.576  
2.573  
2.569  
2.565  
2.562  
2.423

Current Data Parameters  
NAME ARADHANA SAHOO ASCEND 500  
EXPNO 197  
PROCNO 1

F2 - Acquisition Parameters  
Date\_ 20221227  
Time 15.24 h  
INSTRUM spect  
PROBHD Z119470\_0291 (  
PULPROG zg30  
TD 65536  
SOLVENT DMSO  
NS 16  
DS 2  
SWH 10000.000 Hz  
FIDRES 0.305176 Hz  
AQ 3.2767999 sec  
RG 54.81  
DW 50.000 usec  
DE 6.50 usec  
TE 297.5 K  
D1 1.00000000 sec  
TD0 1  
SFO1 500.3720898 MHz  
NUC1 1H  
P1 10.00 usec  
PLW1 23.23100090 W

F2 - Processing parameters  
SI 65536  
SF 500.3689691 MHz  
WDW EM  
SSB 0  
LB 0.30 Hz  
GB 0  
PC 1.00

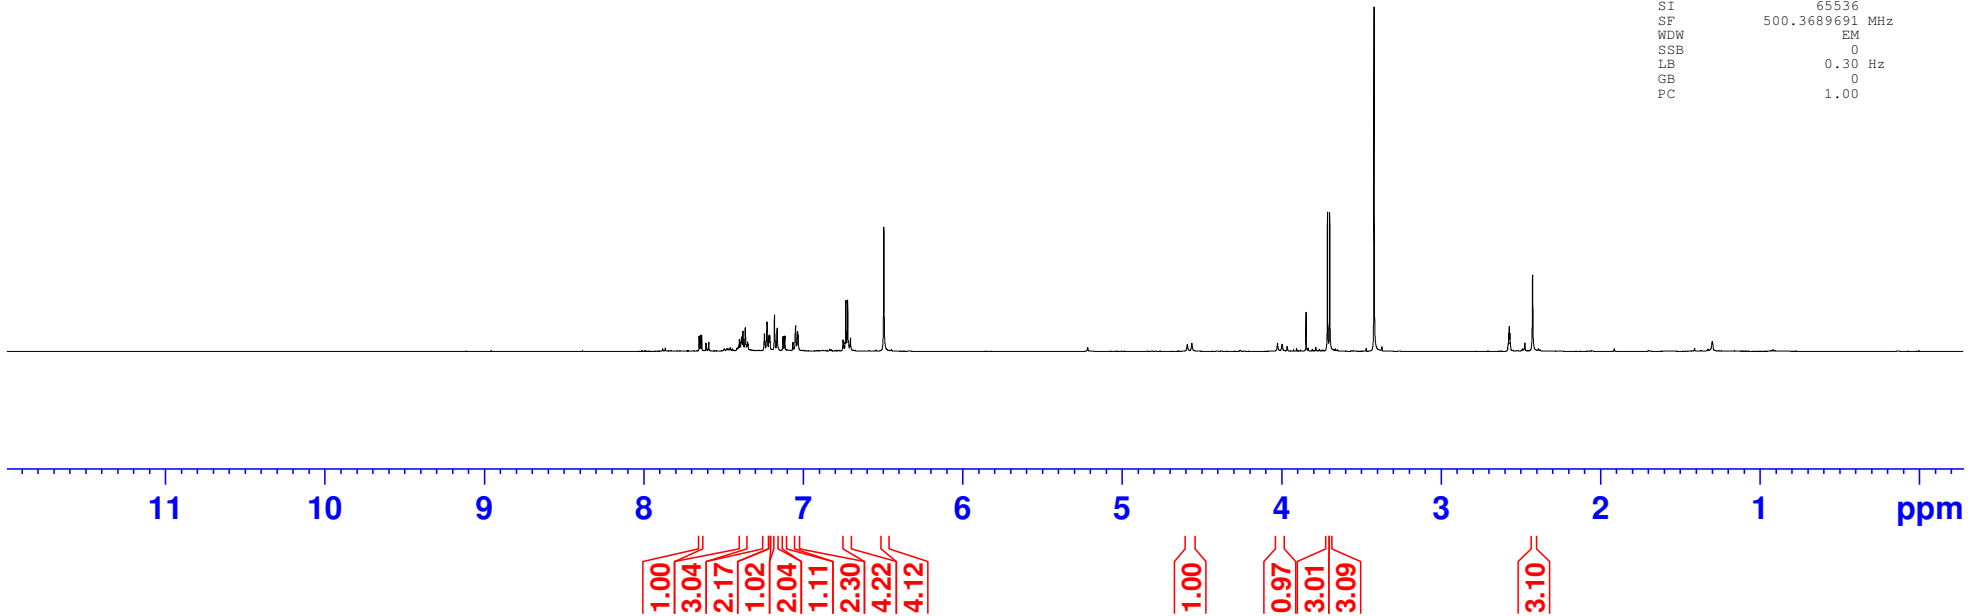



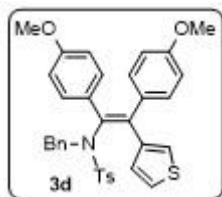

159.20  
158.36  
143.29  
134.40  
133.20  
132.64  
132.13  
131.64  
130.15  
129.95  
129.45  
129.20  
128.65  
128.43  
128.03  
127.59  
126.99  
125.85  
113.87

55.65  
55.40  
46.70  
40.95  
40.75  
40.54  
40.33  
40.12  
39.91  
39.70  
21.27

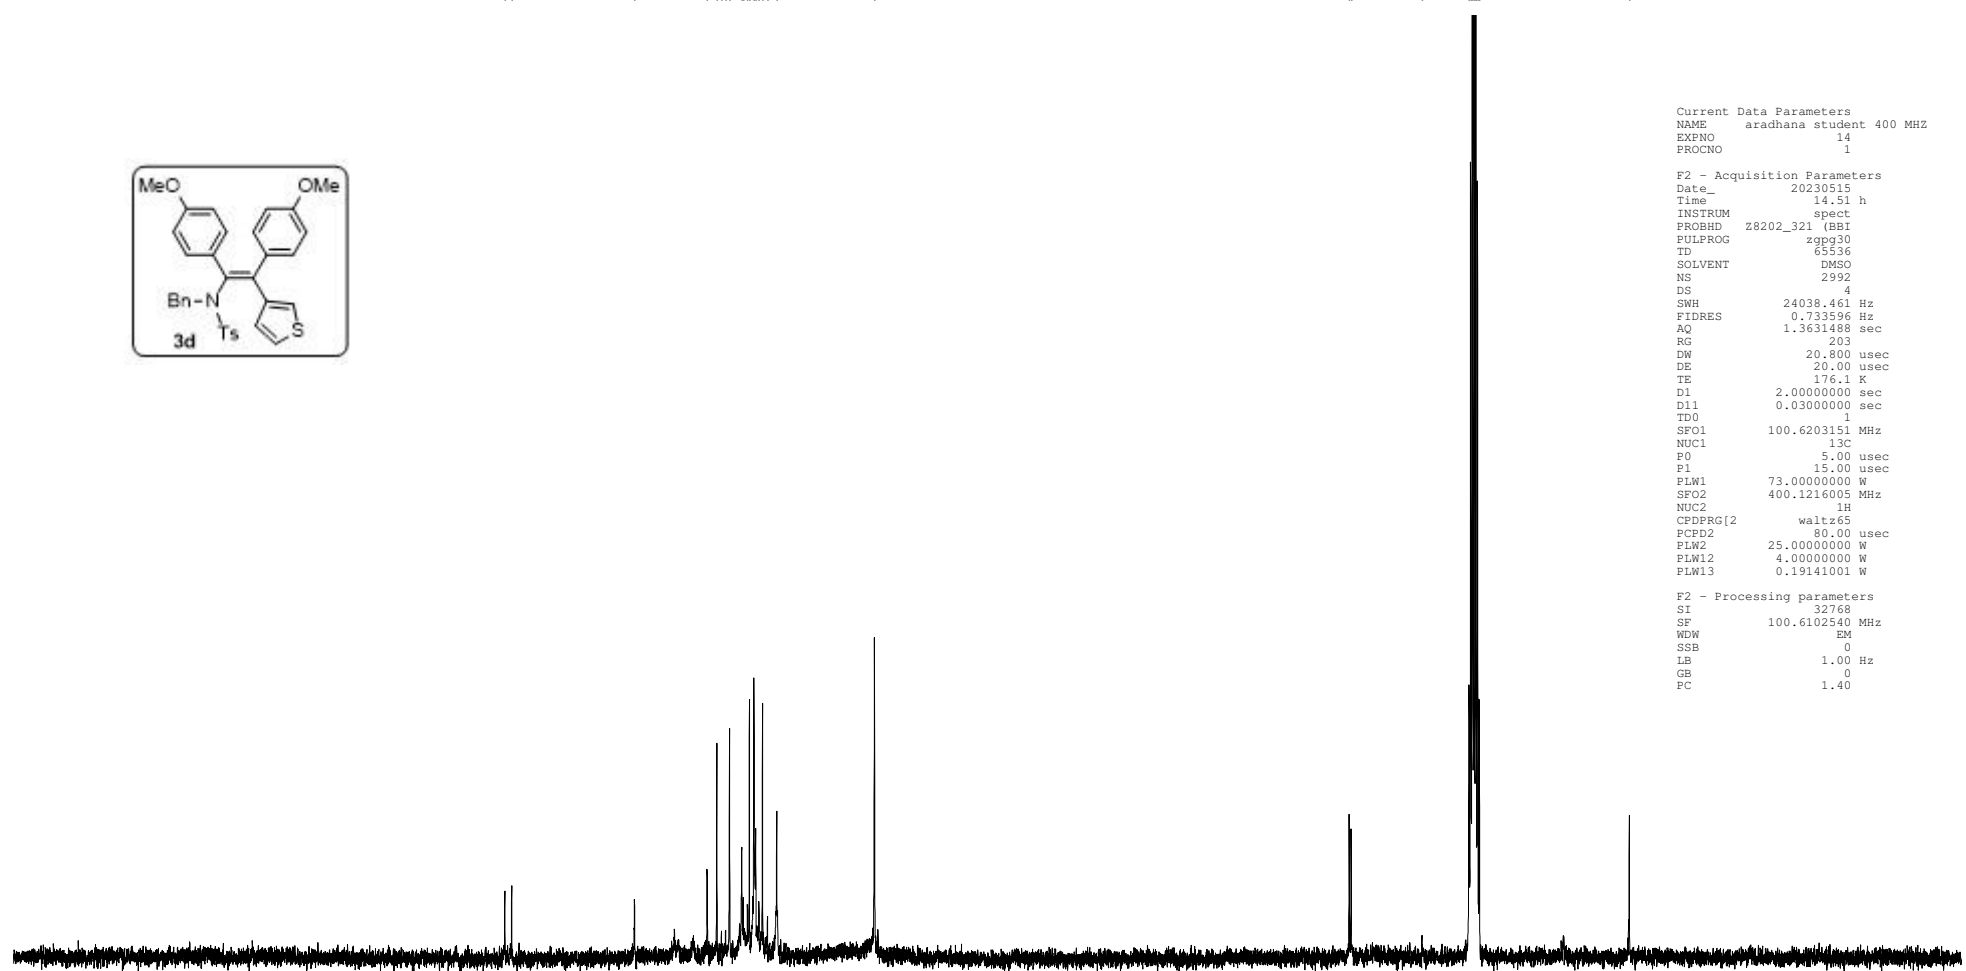

Current Data Parameters  
NAME aradhana student 400 MHz  
EXPNO 14  
PROCNO 1

F2 - Acquisition Parameters  
Date\_ 20230515  
Time 14.51 h  
INSTRUM spect  
PROBHD z8202\_321 (BBI)  
PULPROG zgpg30  
TD 65536  
SOLVENT DMSO  
NS 2992  
DS 4  
SWH 24038.461 Hz  
FIDRES 0.733596 Hz  
AQ 1.3631488 sec  
RG 203  
DW 20.800 usec  
DE 20.00 usec  
TE 176.1 K  
D1 2.0000000 sec  
D11 0.0300000 sec  
TD0 1  
SFO1 100.6203151 MHz  
NUC1 13C  
P0 5.00 usec  
P1 15.00 usec  
PLW1 73.0000000 W  
SFO2 400.1216005 MHz  
NUC2 1H  
CPDPRG[2] waltz65  
PCPD2 80.00 usec  
PLW2 25.0000000 W  
PLW12 4.0000000 W  
PLW13 0.19141001 W

F2 - Processing parameters  
SI 32768  
SF 100.6102540 MHz  
WDW EM  
SSB 0  
LB 1.00 Hz  
GB 0  
PC 1.40

210 200 190 180 170 160 150 140 130 120 110 100 90 80 70 60 50 40 30 20 10 0 ppm

7.849  
7.832  
7.722  
7.705  
7.648  
7.632  
7.609  
7.607  
7.596  
7.593  
7.579  
7.577  
7.554  
7.551  
7.536  
7.534  
7.520  
7.506  
7.504  
7.363  
7.360  
7.356  
7.351  
7.316  
7.260  
7.252  
7.250  
7.212  
7.197  
7.183  
7.165  
7.161  
7.147  
7.144  
7.144  
6.903  
6.889  
6.790  
6.784  
6.781  
6.771  
6.767  
6.761  
6.716  
6.700  
6.590  
6.585  
6.581  
6.571  
6.567  
6.398  
6.381  
4.461  
4.432  
4.034  
4.005  
3.699  
3.592

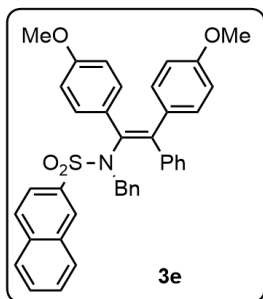

Current Data Parameters  
 NAME aradhanasahoo updated 500  
 EXPNO 22  
 PROCNO 1

F2 - Acquisition Parameters  
 Date\_ 20210916  
 Time 10.01 h  
 INSTRUM spect  
 PROBHD Z109128\_0042 (  
 PULPROG zg30  
 TD 65536  
 SOLVENT CDCl3  
 NS 16  
 DS 2  
 SWH 10000.000 Hz  
 FIDRES 0.305176 Hz  
 AQ 3.2767999 sec  
 RG 101  
 DW 50.000 usec  
 DE 13.04 usec  
 TE 296.6 K  
 D1 1.0000000 sec  
 TD0 1  
 SFO1 500.1830886 MHz  
 NUC1 1H  
 P0 5.00 usec  
 P1 15.00 usec  
 PLW1 4.84679985 W

F2 - Processing parameters  
 SI 65536  
 SF 500.1800106 MHz  
 WDW EM  
 SSB 0  
 LB 0.30 Hz  
 GB 0  
 PC 1.00

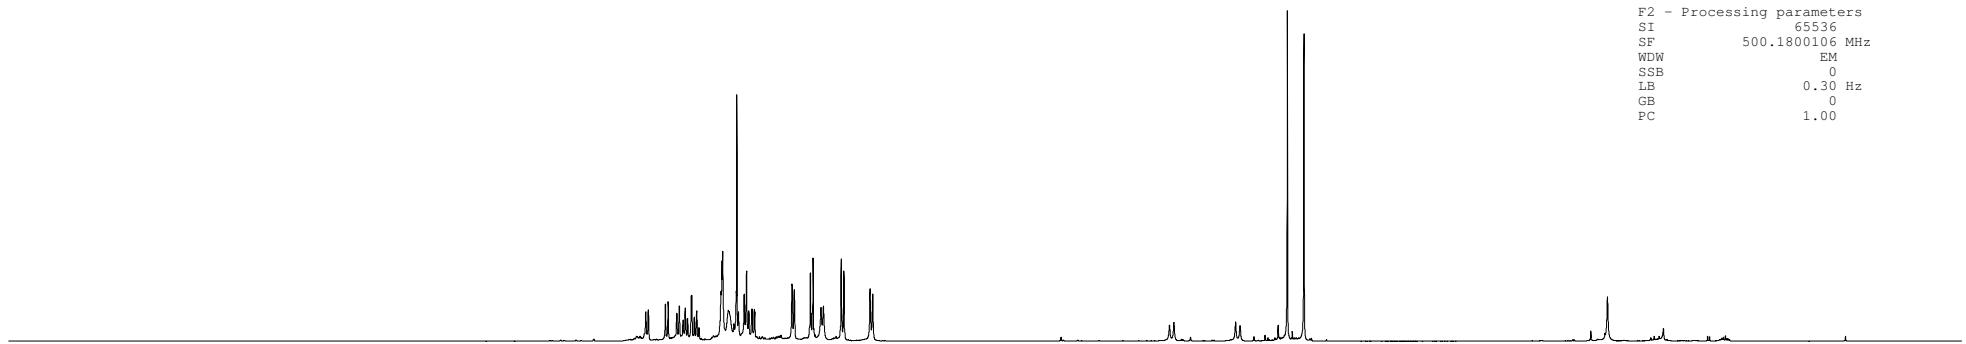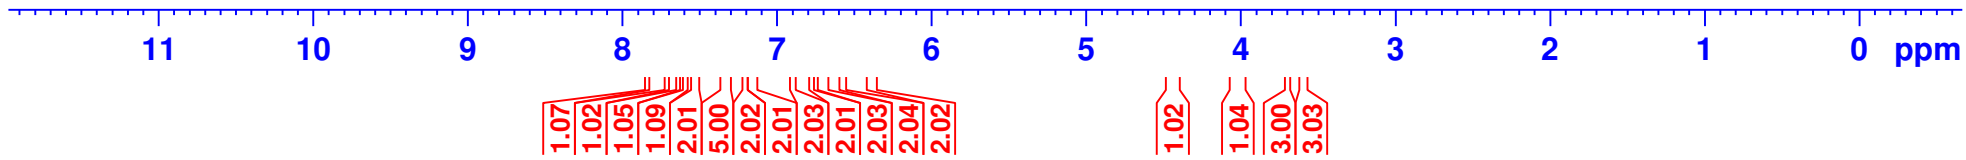

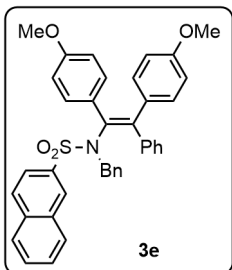

158.49  
158.13  
141.98  
140.61  
137.84  
136.19  
134.74  
134.44  
133.30  
132.83  
132.45  
131.84  
130.21  
130.07  
129.41  
129.39  
129.23  
128.42  
128.36  
128.33  
128.28  
128.16  
127.59  
127.54  
126.90  
122.95  
113.08  
112.98

77.25  
77.00  
76.74

55.01  
54.89  
51.55

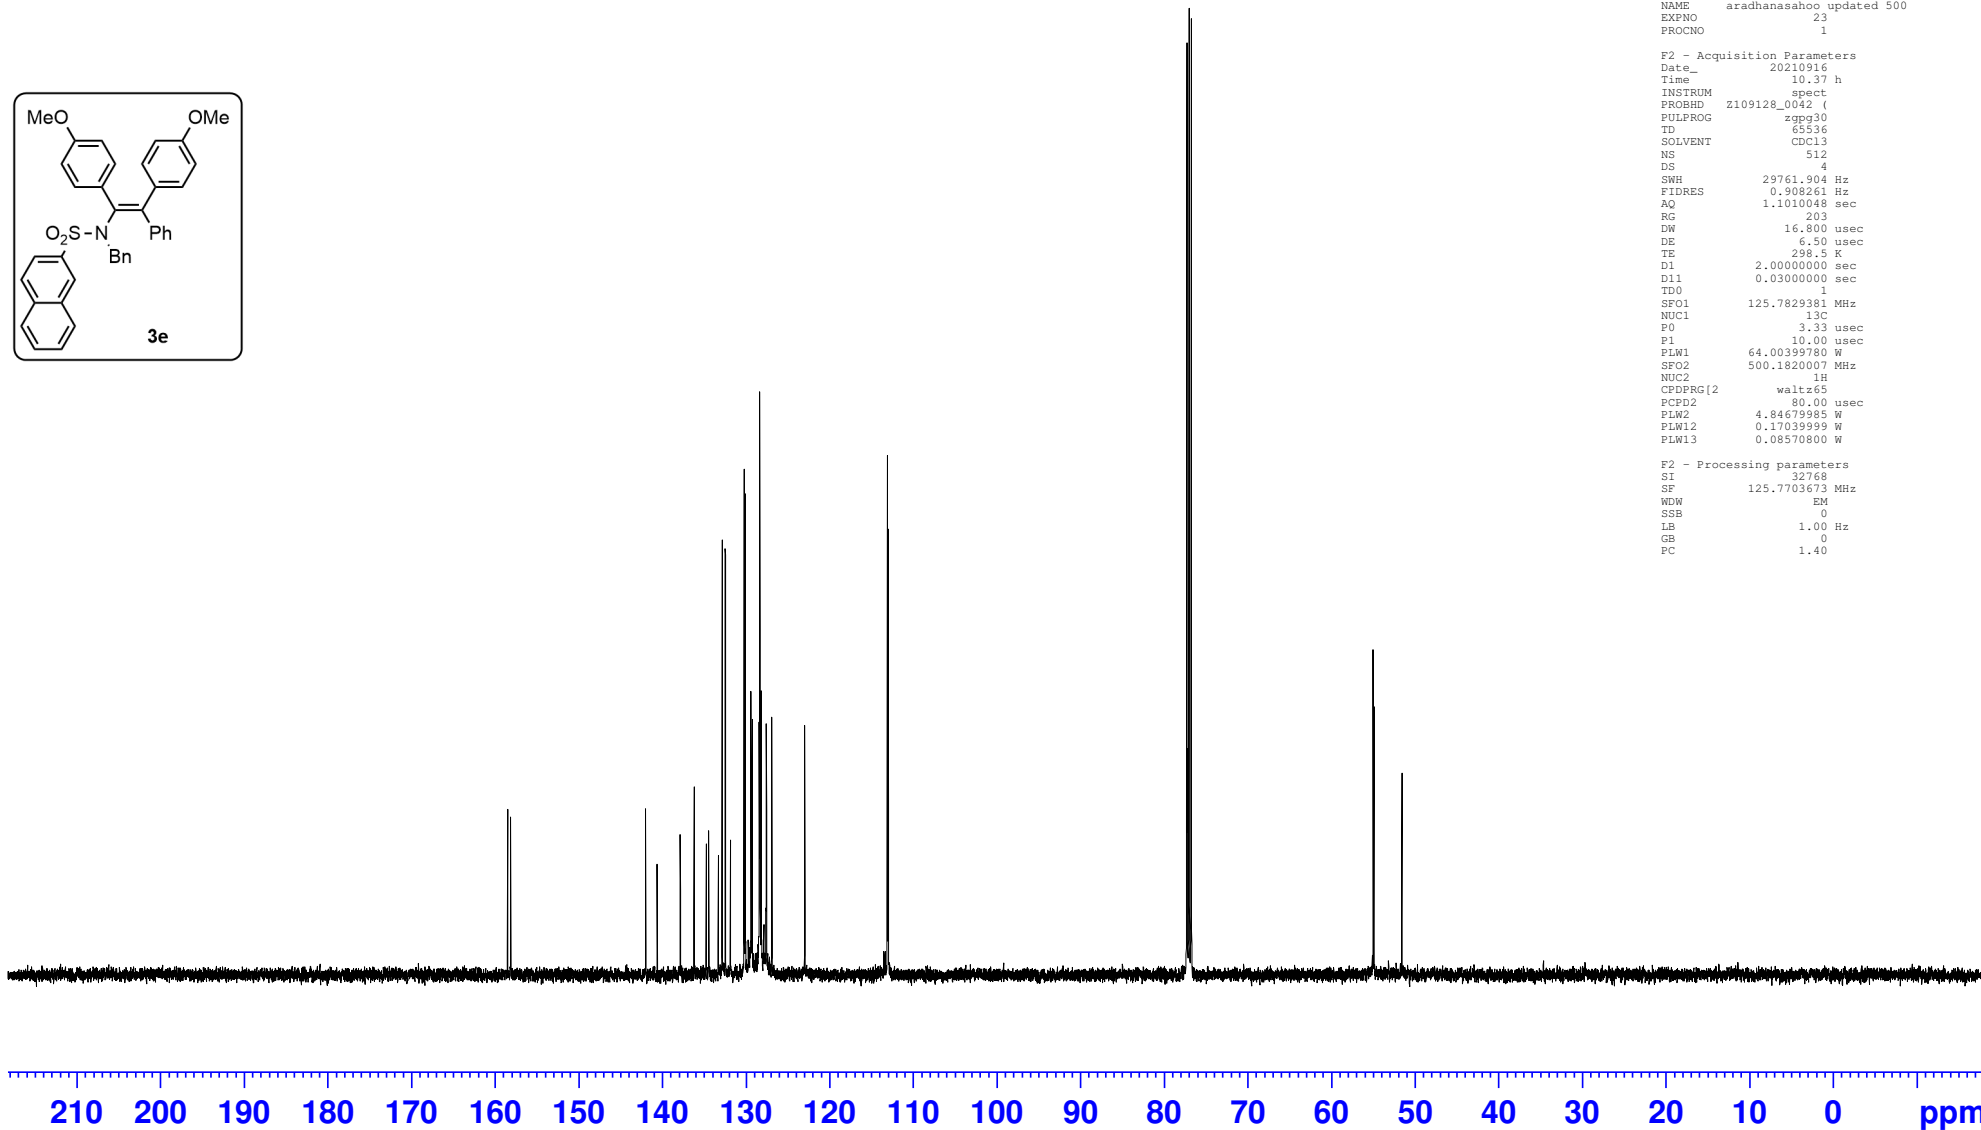

```

Current Data Parameters updated 500
NAME aradhanasahoo
EXPNO 23
PROCNO 1

F2 - Acquisition Parameters
Date_ 20230916
Time 10.37 h
INSTRUM spect
PROBHD Z109128_0042 (
PULPROG zgpg30
TD 65536
ID 65536
SOLVENT CDCl3
NS 512
DS 4
SWH 29761.904 Hz
FIDRES 0.908261 Hz
AQ 1.1010048 sec
RG 203
DW 16.800 usec
DE 6.50 usec
TE 298.5 K
D1 2.0000000 sec
D11 0.0300000 sec
TDO 1
SFO1 125.7829381 MHz
NUC1 13C
P0 3.33 usec
F1 10.00 usec
PLW1 64.00399780 W
SFO2 500.1820007 MHz
NUC2 1H
CPDPRG2 waltz65
PCPD2 80.00 usec
PLM2 4.84679985 W
PLW12 0.17039999 W
PLW13 0.08570800 W

F2 - Processing parameters
SI 32768
SF 125.7703673 MHz
WDW EM
SSB 0
LB 1.00 Hz
GB 0
PC 1.40

```

7.606  
7.603  
7.589  
7.509  
7.506  
7.495  
7.479  
7.460  
7.443  
7.429  
7.329  
7.327  
7.317  
7.313  
7.304  
7.298  
7.260  
7.252  
7.179  
7.168  
7.148  
7.144  
7.140  
7.130  
7.127  
7.123  
6.875  
6.861  
6.858  
6.845  
6.829  
6.806  
6.800  
6.796  
6.786  
6.782  
6.777  
6.603  
6.597  
6.593  
6.583  
6.580  
6.574  
6.565  
6.547  
4.367  
4.337  
4.061  
4.032  
3.727  
3.708

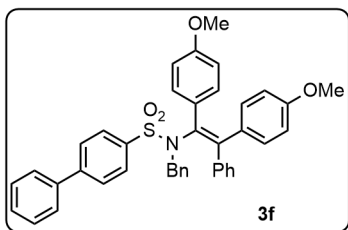

Current Data Parameters  
NAME aradhanasahoo updated 500  
EXPNO 210  
PROCNO 1

F2 - Acquisition Parameters  
Date\_ 20221202  
Time 11.00 h  
INSTRUM spect  
PROBHD Z109128\_0042 (  
PULPROG zg30  
TD 65536  
SOLVENT CDCl3  
NS 16  
DS 2  
SWH 10000.000 Hz  
FIDRES 0.305176 Hz  
AQ 3.2767999 sec  
RG 71.8  
DW 50.000 usec  
DE 13.04 usec  
TE 297.1 K  
D1 1.0000000 sec  
TD0 1  
SF01 500.1830886 MHz  
NUC1 1H  
P0 5.00 usec  
P1 15.00 usec  
PLWI 4.84679985 W

F2 - Processing parameters  
SI 65536  
SF 500.1800120 MHz  
WDW EM  
SSB 0  
LB 0.30 Hz  
GB 0  
PC 1.00

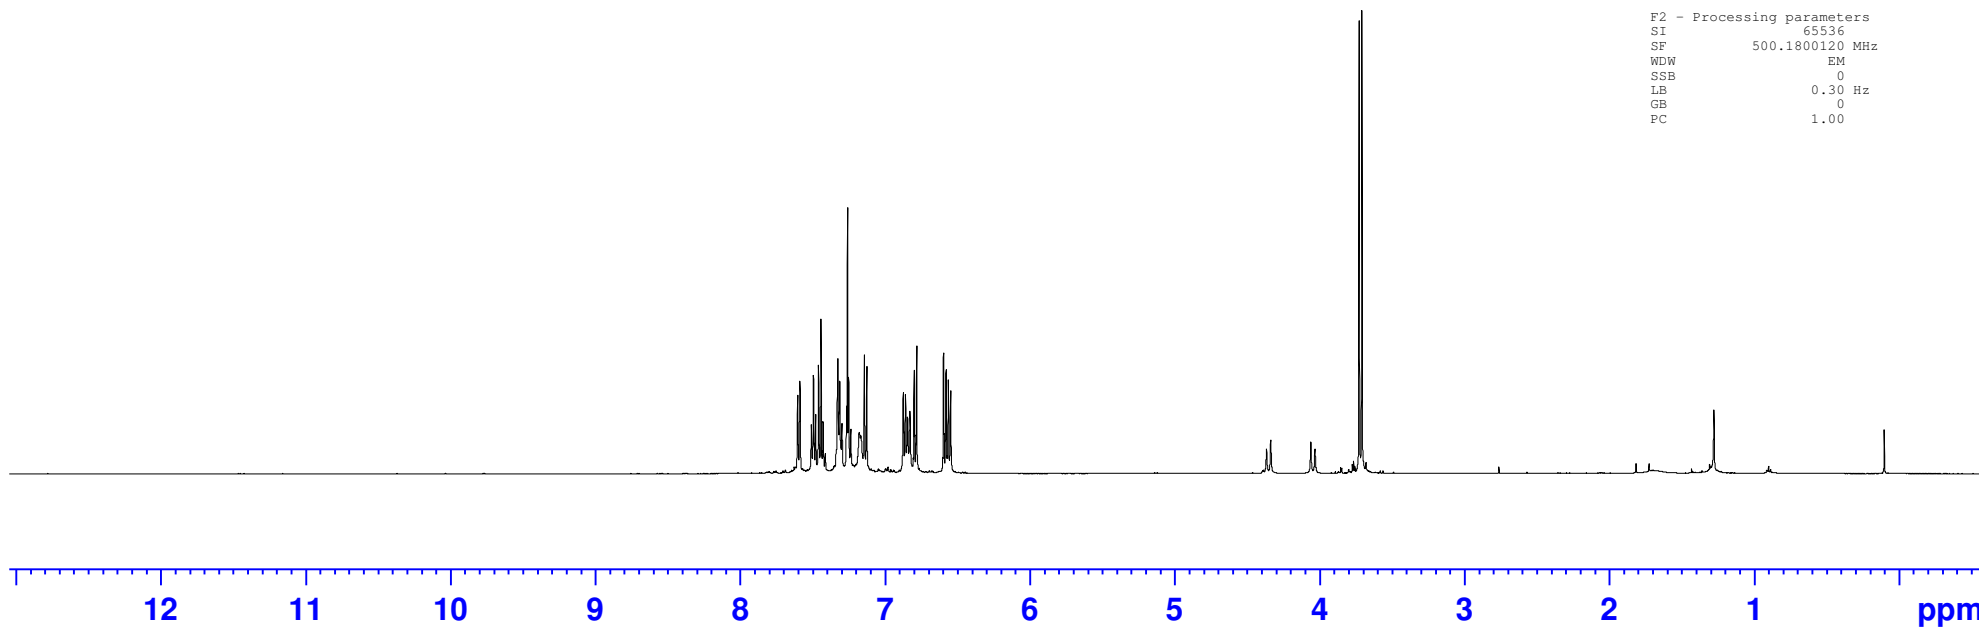

2.16  
4.99  
1.10  
4.07  
0.99  
2.01  
2.06  
2.03  
2.01  
2.07  
2.06  
2.02  
1.01  
1.02  
3.00  
3.04

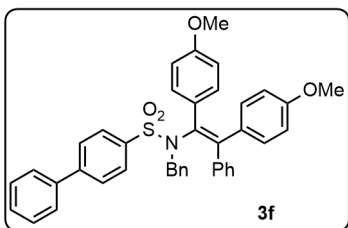

158.64  
158.11  
144.93  
142.07  
141.16  
139.40  
139.33  
136.04  
134.80  
132.97  
132.79  
132.43  
130.18  
130.07  
129.55  
128.98  
128.37  
128.35  
128.32  
128.25  
128.19  
127.32  
127.23  
126.82  
113.12  
113.06

77.25  
77.00  
76.74

55.07  
55.00  
51.26

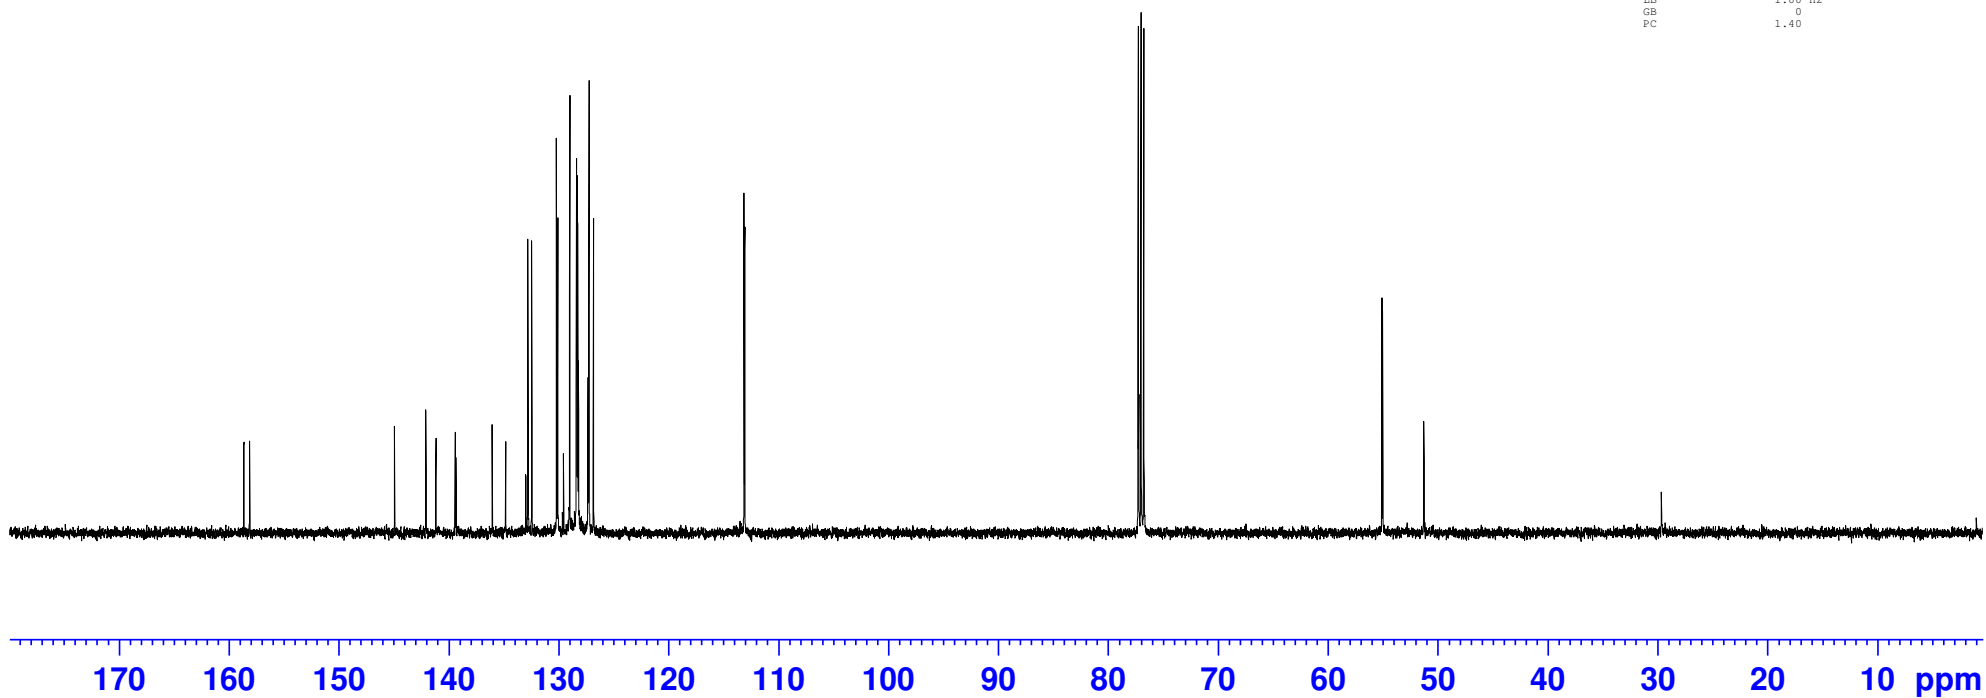

```

Current Data Parameters
NAME   aradhanasahoo updated 500
EXPNO   211
PROCNO   1

F2 - Acquisition Parameters
Date_    20221202
Time     11.11 h
INSTRUM  spect
PROBHD   Z109128_0042 (
PULPROG  zgpg30
TD       65536
SOLVENT  CDCl3
NS       202
DS       4
SWH      29761.904 Hz
FIDRES   0.908261 Hz
AQ       1.1010048 sec
RG       203
DW       16.800 usec
DE       6.50 usec
TE       297.1 K
D1       2.00000000 sec
D11      0.03000000 sec
TD0      1
SFO1     125.7829381 MHz
NUC1     13C
PO       3.33 usec
P1       10.00 usec
PLW1     64.00399780 W
SFO2     500.1820007 MHz
NUC2     1H
CPDPRG2  waltz65
PCPD2    80.00 usec
PLW2     4.84679985 W
PLW12    0.17039999 W
PLW13    0.08570800 W

F2 - Processing parameters
SI       32768
SF       125.7703709 MHz
WDW      EM
SSB      0
LB       1.00 Hz
GB       0
FC       1.40
  
```

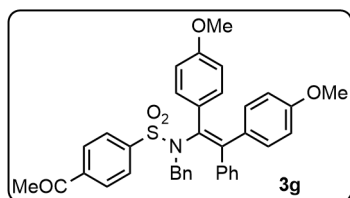

7.848  
7.832  
7.365  
7.363  
7.354  
7.341  
7.330  
7.315  
7.302  
7.247  
7.245  
7.230  
7.200  
7.187  
6.991  
6.975  
6.684  
6.663  
6.644  
6.483  
6.465

4.463  
4.434

3.916  
3.887  
3.645  
3.358

2.615  
2.511  
2.508  
2.504

Current Data Parameters  
NAME aradhanasahoo updated 500  
EXPNO 261  
PROCNO 1

F2 - Acquisition Parameters  
Date\_ 20230512  
Time 15.42 h  
INSTRUM spect  
PROBHD zg30  
PULPROG zg30  
TD 65536  
SOLVENT DMSO  
NS 16  
DS 2  
SWH 10000.000 Hz  
FIDRES 0.305176 Hz  
AQ 3.2767999 sec  
RG 101  
DW 50.000 usec  
DE 13.04 usec  
TE 298.3 K  
D1 1.0000000 sec  
TD0 1  
SFO1 500.1830886 MHz  
NUC1 1H  
P0 5.00 usec  
P1 15.00 usec  
PLW1 4.84679985 W

F2 - Processing parameters  
SI 65536  
SF 500.1800000 MHz  
WDW EM  
SSB 0  
LB 0.30 Hz  
GB 0  
PC 1.00

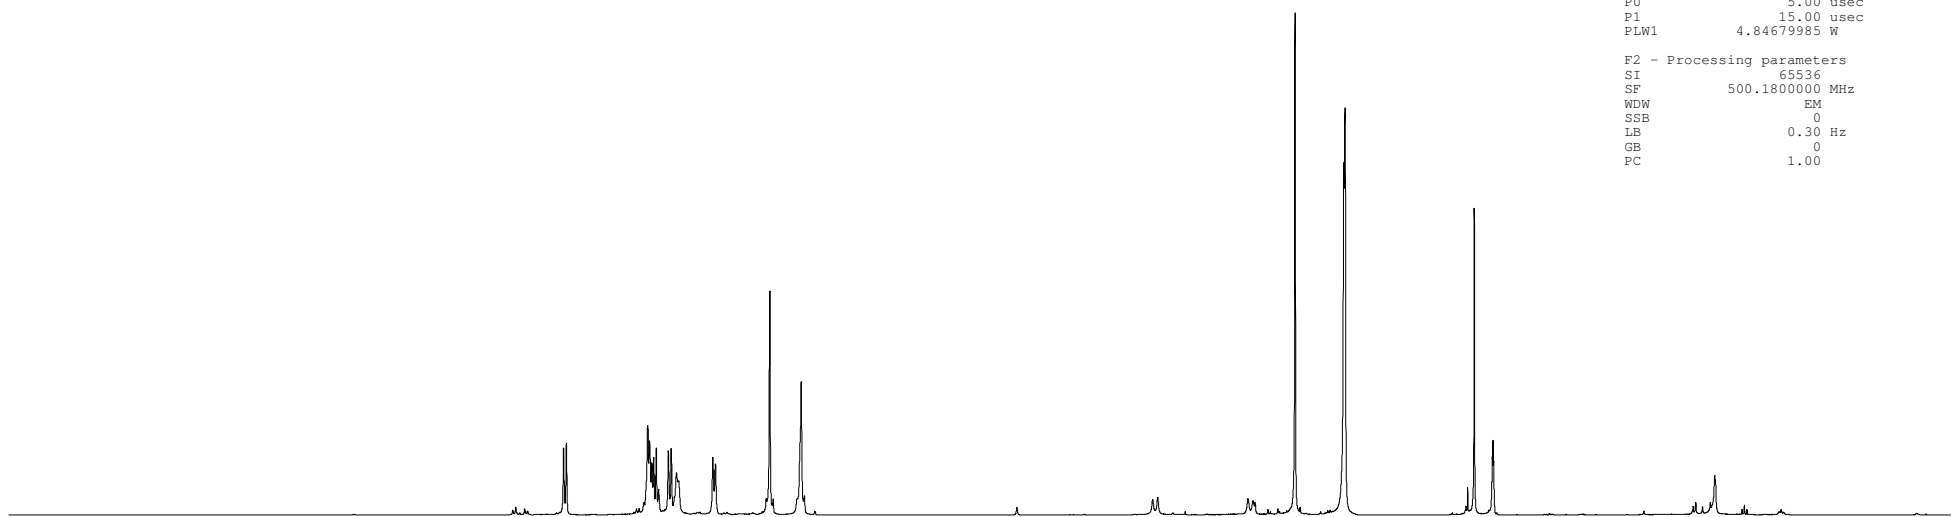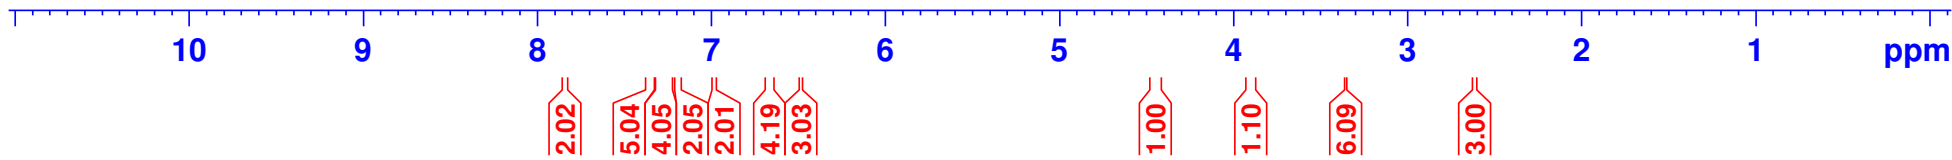

— 197.82

158.86  
158.37  
144.43  
141.92  
140.48  
139.76  
135.97  
134.57  
133.19  
132.60  
132.37  
130.45  
129.99  
129.84  
129.52  
128.99  
128.93  
128.84  
128.68  
128.18  
127.83  
113.85  
113.55

55.48  
55.38  
51.54  
40.51  
40.35  
40.18  
40.01  
39.84  
39.68  
39.51  
27.49

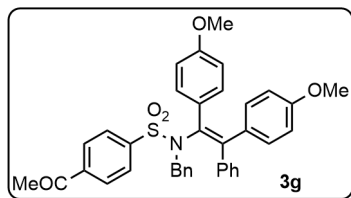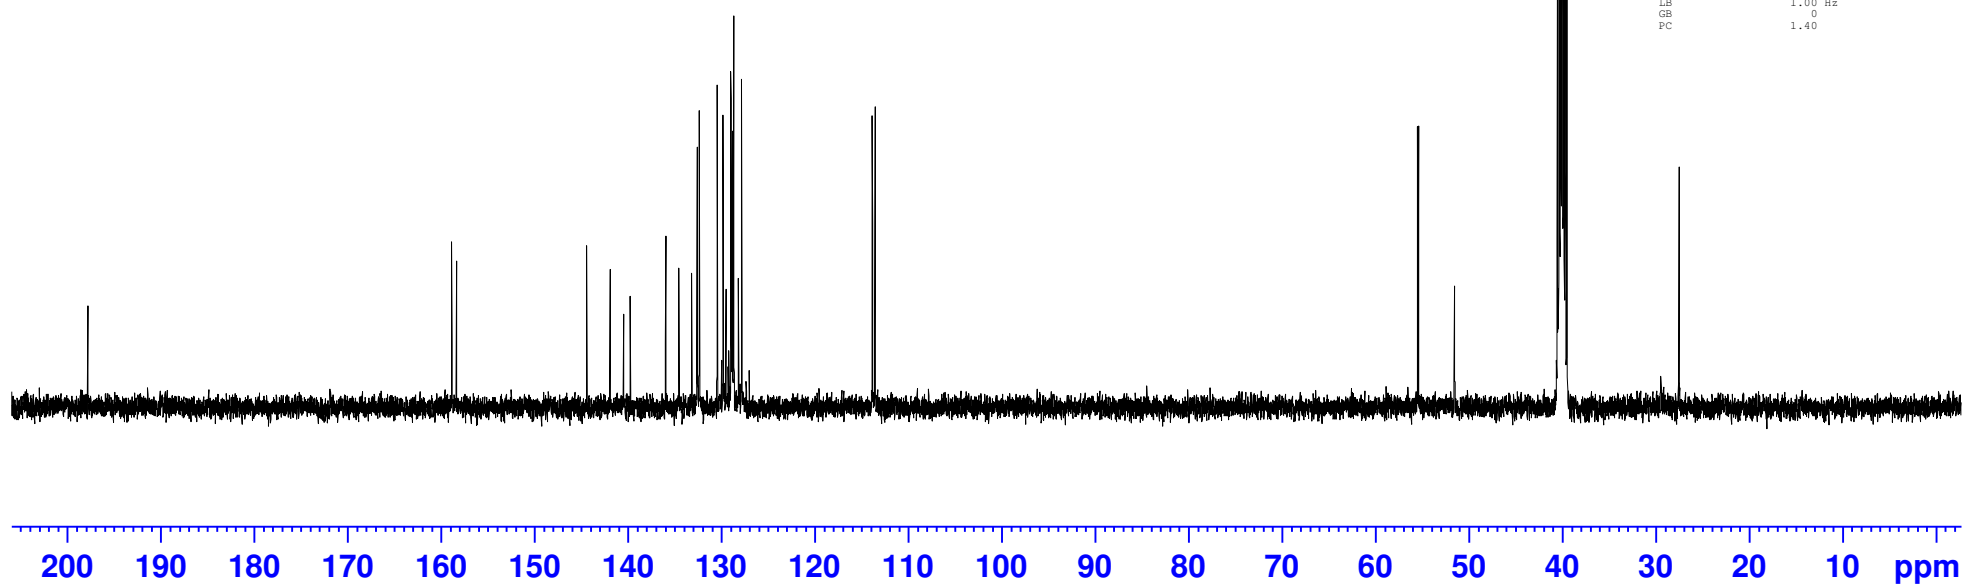

Current Data Parameters  
NAME aradhanasahoo updated 500  
EXPNO 262  
PROCNO 1  
F2 - Acquisition Parameters  
Date\_ 20230512  
Time 16.15 h  
INSTRUM spect  
PROBHD Z109128\_0042 (1  
PULPROG zgpg30  
TD 65536  
SOLVENT DMSO  
NS 616  
DS 4  
SWH 29761.904 Hz  
FIDRES 0.908261 Hz  
AQ 1.1010048 sec  
RG 203  
DW 16.800 usec  
DE 6.50 usec  
TE 299.2 K  
D1 2.0000000 sec  
D11 0.0300000 sec  
TD0 1  
SFO1 125.7829381 MHz  
NUC1 13C  
P0 3.33 usec  
P1 10.00 usec  
PLW1 64.00399780 W  
SFO2 500.1820007 MHz  
NUC2 1H  
CPDPRG2 waltz65  
PCPD2 80.00 usec  
PLW2 4.84679985 W  
PLW12 0.17039999 W  
PLW13 0.08570800 W  
F2 - Processing parameters  
SI 32768  
SF 125.7703610 MHz  
WDW EM  
SSB 0  
LB 1.00 Hz  
GB 0  
PC 1.40

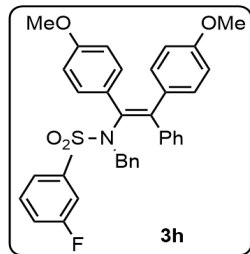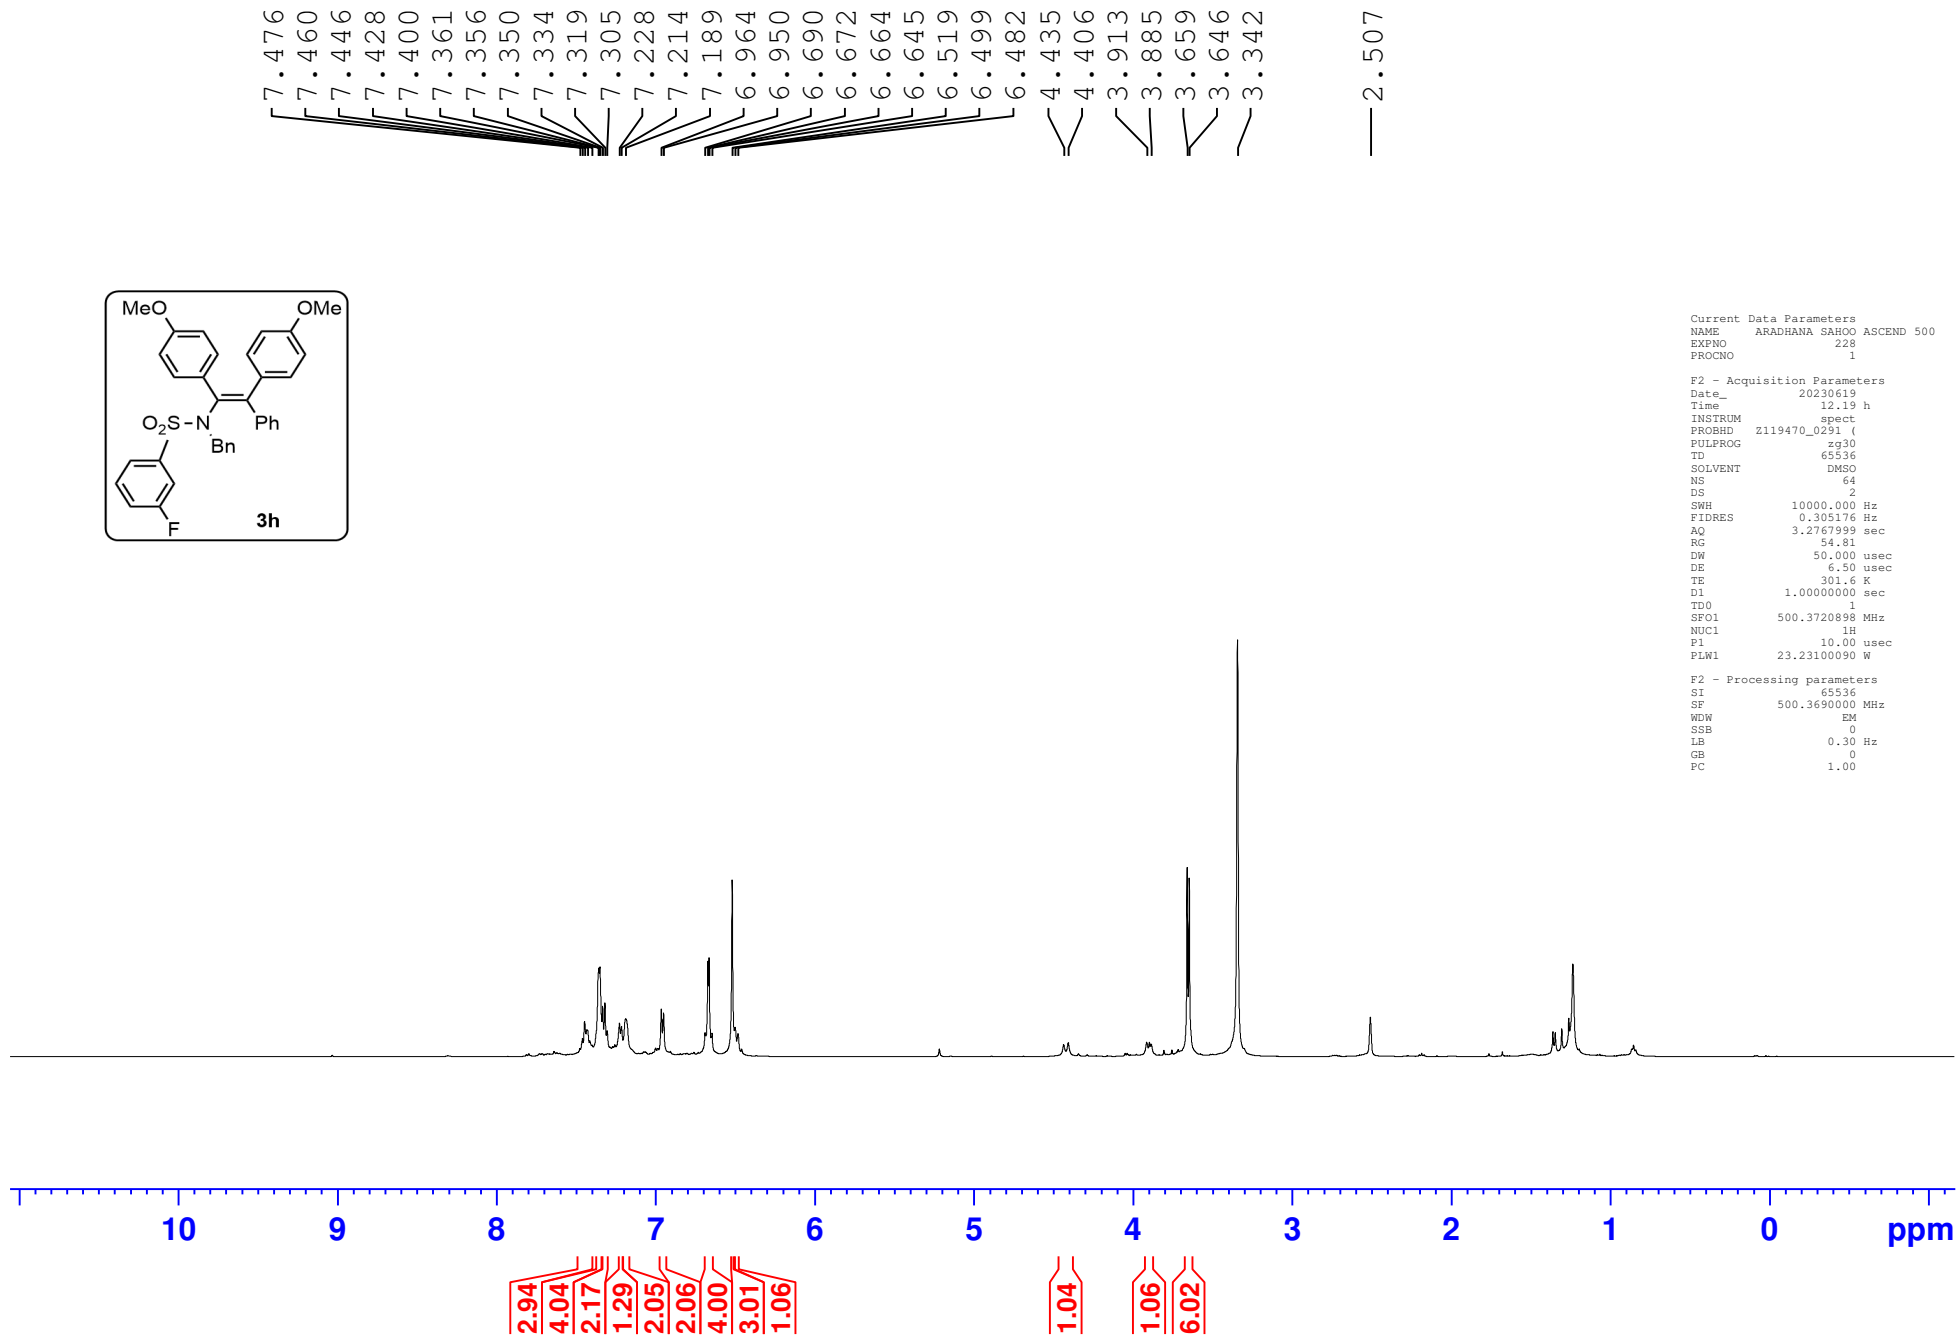

Current Data Parameters  
 NAME ARADHANA SAHOO ASCEND 500  
 EXPNO 228  
 PROCNO 1

F2 - Acquisition Parameters  
 Date\_ 20230619  
 Time 12.19 h  
 INSTRUM spect  
 PROBHD z119470\_0291 ( ( )  
 PULPROG zg30  
 TD 65536  
 SOLVENT DMSO  
 NS 64  
 DS 2  
 SWH 10000.000 Hz  
 FIDRES 0.305176 Hz  
 AQ 3.2767999 sec  
 RG 54.81  
 DW 50.000 usec  
 DE 6.50 usec  
 TE 301.6 K  
 D1 1.00000000 sec  
 TDO 1  
 SFO1 500.3720898 MHz  
 NUC1 1H  
 P1 10.00 usec  
 PLW1 23.23100090 W

F2 - Processing parameters  
 SI 65536  
 SF 500.3690000 MHz  
 WDW EM  
 SSB 0  
 LB 0.30 Hz  
 GB 0  
 PC 1.00



162.88  
160.89  
158.77  
158.20  
141.77  
141.13  
135.87  
134.59  
132.86  
132.73  
132.40  
130.18  
129.93  
129.80  
129.74  
129.40  
129.10  
128.83  
128.67  
128.47  
128.32  
127.67  
123.44  
123.42  
119.36  
119.19  
115.21  
115.02  
113.19  
113.10

77.25  
76.99  
76.74

55.10  
55.02  
51.62

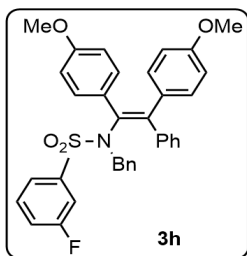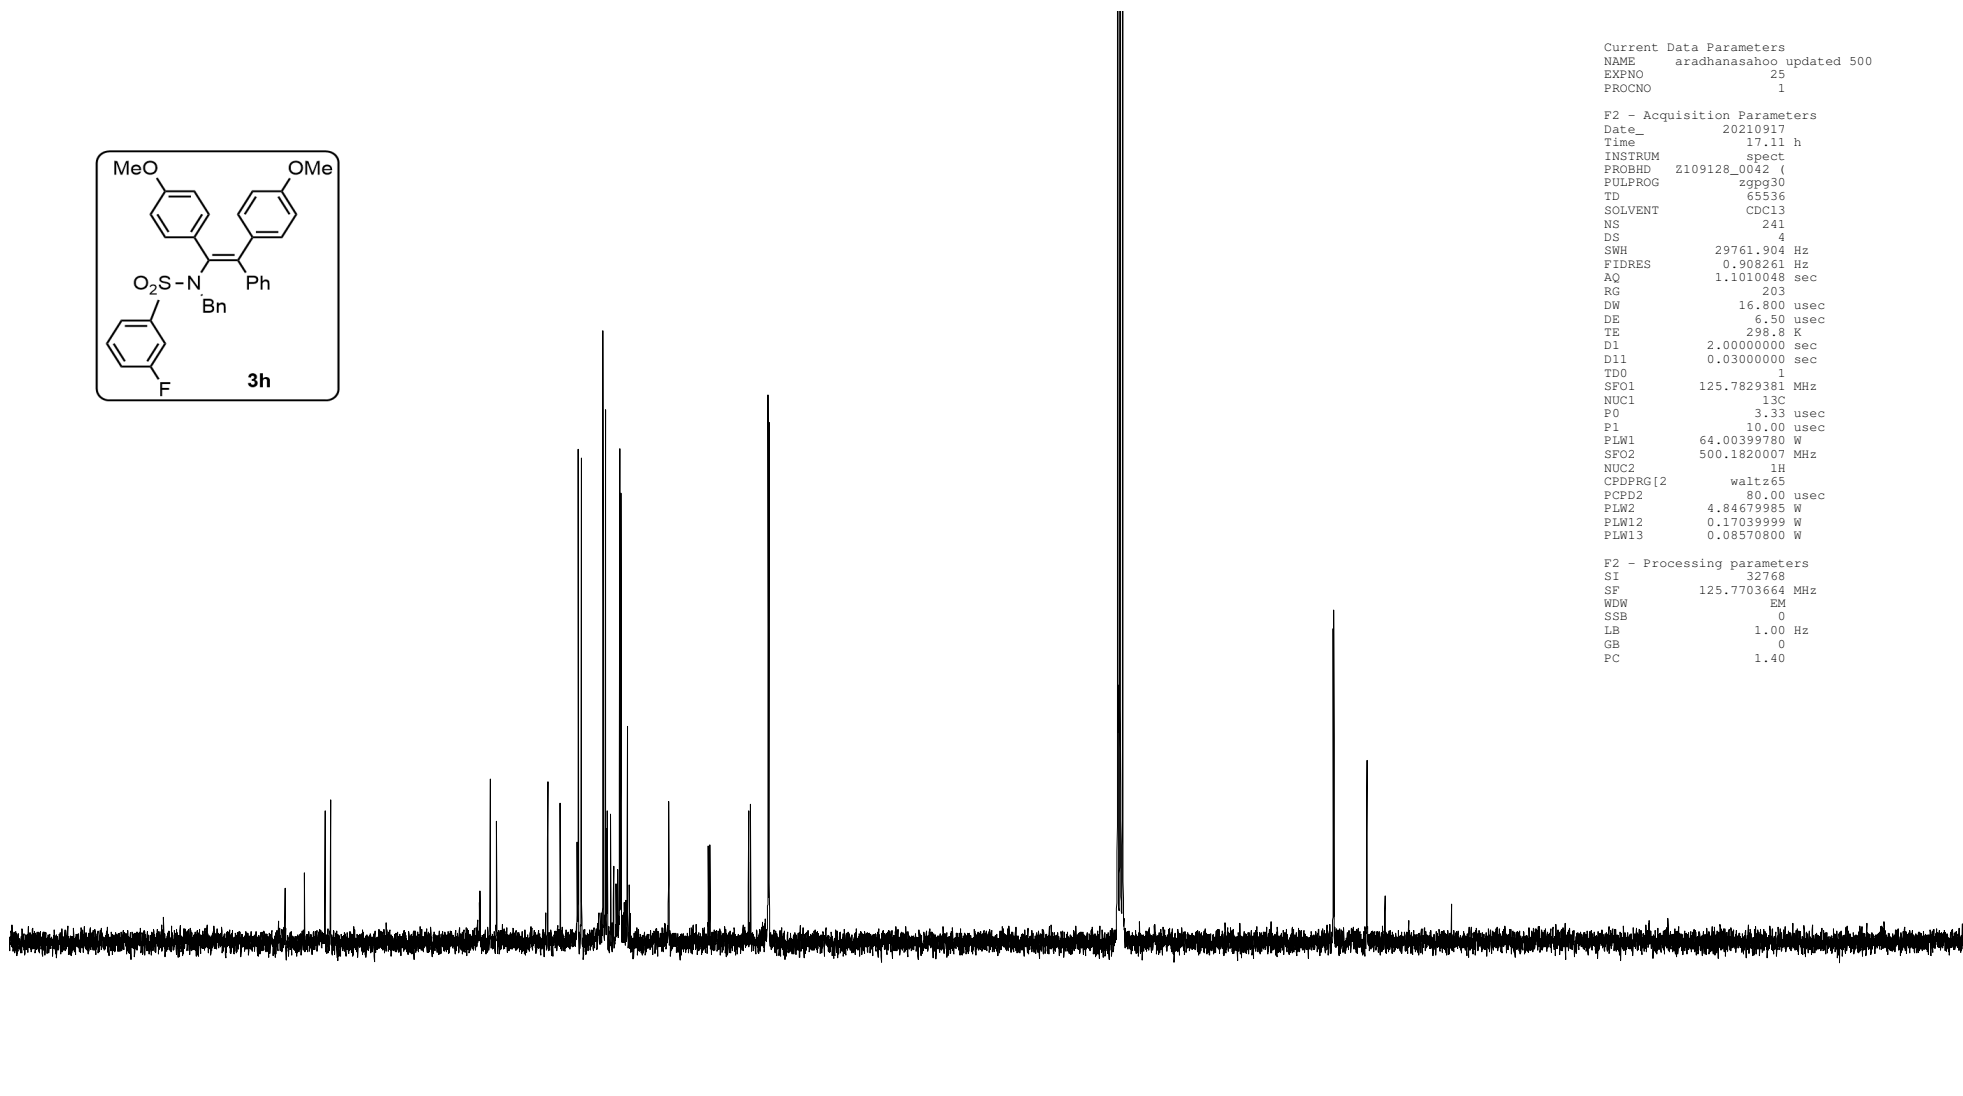

```

Current Data Parameters
NAME aradhanasahoo updated 500
EXPNO 25
PROCNO 1

F2 - Acquisition Parameters
Date_ 20210917
Time 17.11 h
INSTRUM spect
PROBHD Z109128_0042 (
PULPROG zgpg30
TD 65536
SOLVENT CDC13
NS 241
DS 4
SWH 29761.904 Hz
FIDRES 0.908261 Hz
AQ 1.1010048 sec
RG 203
DW 16.800 usec
DE 6.50 usec
TE 298.8 K
D1 2.0000000 sec
D11 0.0300000 sec
TD0 1
SFO1 125.7829381 MHz
NUC1 13C
PO 3.33 usec
P1 10.00 usec
PLW1 64.00399780 W
SFO2 500.1820007 MHz
NUC2 1H
CPDPRG[2] waltz65
PCPD2 80.00 usec
PLW2 4.84679985 W
PLW12 0.17039999 W
PLW13 0.08570800 W

F2 - Processing parameters
SI 32768
SF 125.7703664 MHz
WDW EM
SSB 0
LB 1.00 Hz
GB 0
PC 1.40

```

180 170 160 150 140 130 120 110 100 90 80 70 60 50 40 30 20 10 0 ppm

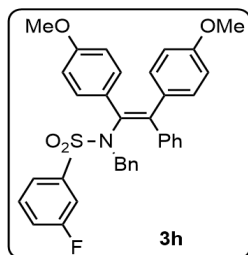

— -110.43

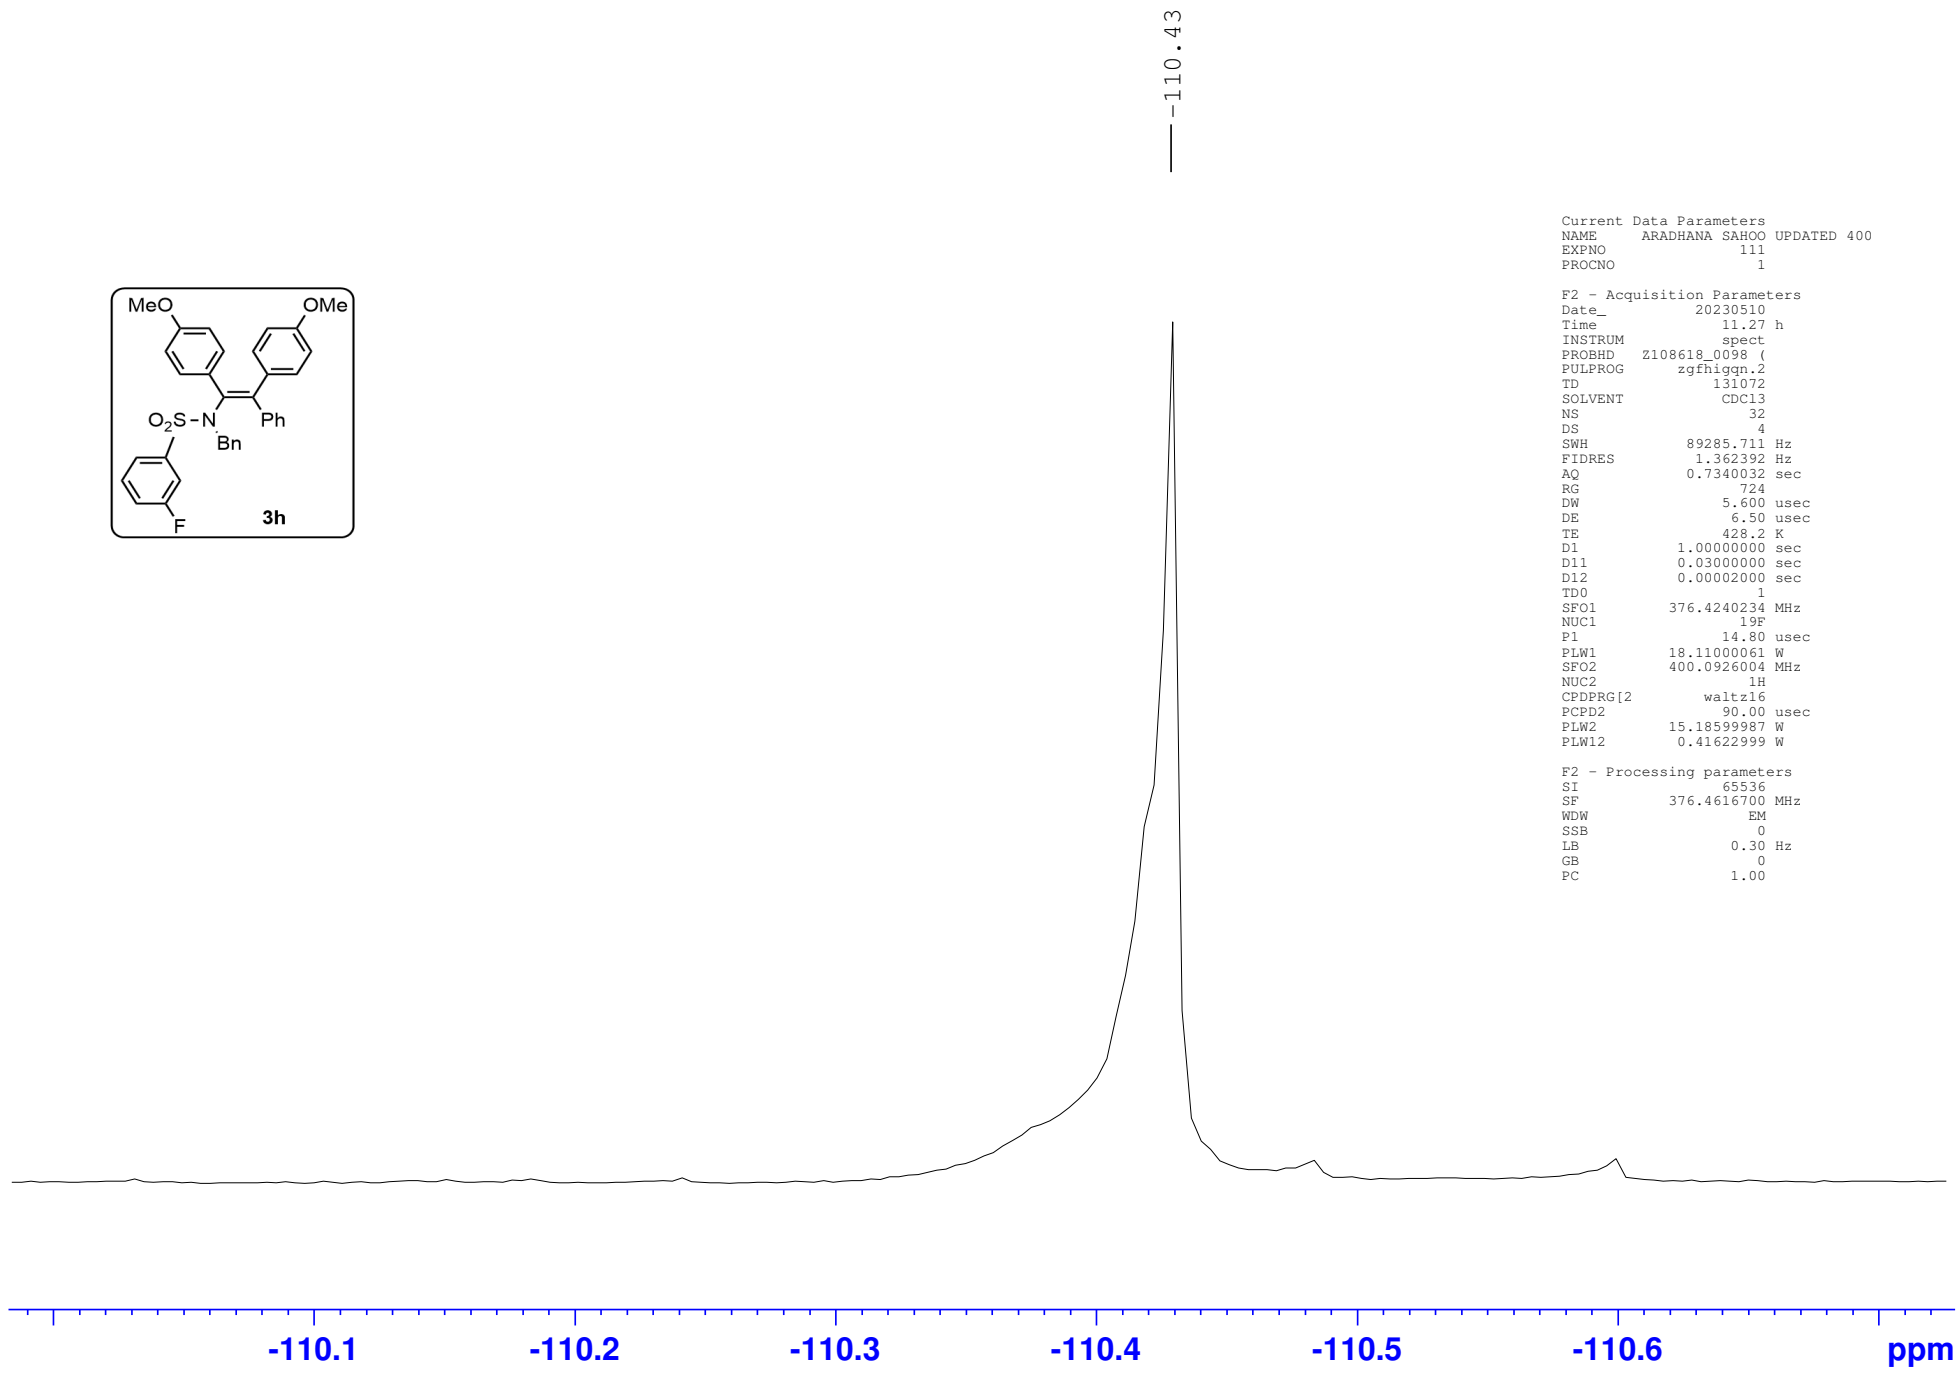

```

Current Data Parameters
NAME      ARADHANA SAHOO UPDATED 400
EXPNO     111
PROCNO    1

F2 - Acquisition Parameters
Date_     20230510
Time      11.27 h
INSTRUM   spect
PROBHD    Z108618_0098 (
PULPROG   zgfhigqn.2
TD         131072
SOLVENT   CDCl3
NS         32
DS         4
SWH        89285.711 Hz
FIDRES     1.362392 Hz
AQ         0.7340032 sec
RG         724
DW         5.600 usec
DE         6.50 usec
TE         428.2 K
D1         1.00000000 sec
D11        0.03000000 sec
D12        0.00002000 sec
TD0        1
SFO1       376.4240234 MHz
NUC1       19F
P1         14.80 usec
PLW1       18.11000061 W
SFO2       400.0926004 MHz
NUC2       1H
CPDPRG[2] waltz16
PCPD2      90.00 usec
PLW2       15.18599987 W
PLW12      0.41622999 W

F2 - Processing parameters
SI         65536
SF         376.4616700 MHz
WDW        EM
SSB        0
LB         0.30 Hz
GB         0
PC         1.00
  
```

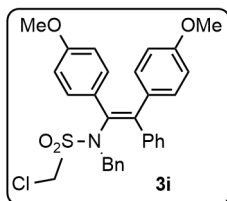

6.166  
6.163  
6.031  
6.027  
6.020  
5.984  
5.971  
5.960  
5.611  
5.600  
5.594  
5.583  
5.499  
5.484  
5.361

3.024  
3.001  
2.900  
2.890  
2.880  
2.412  
2.406  
2.341  
2.335  
2.050  
2.047  
1.952  
1.931  
— 1.200

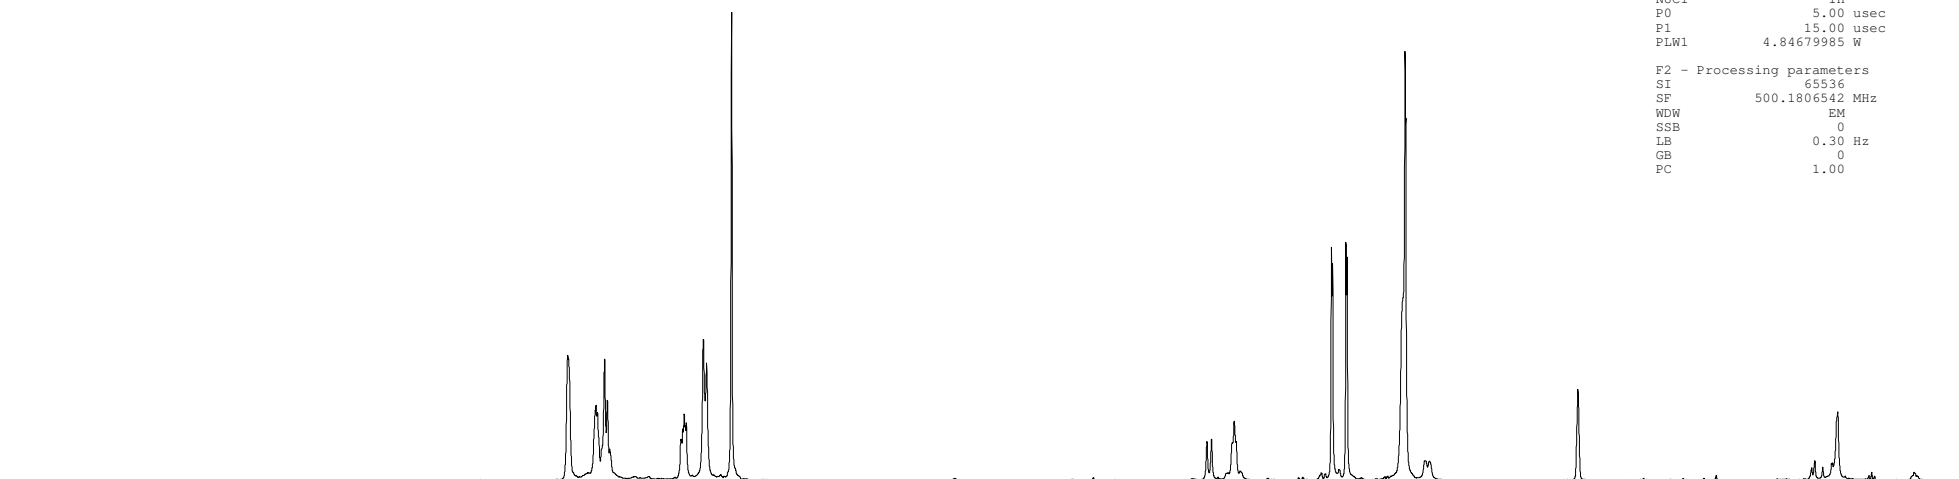

3.06  
2.09  
3.02  
2.06  
4.01  
4.07

1.00  
2.04  
3.05  
3.00  
1.05

Current Data Parameters  
NAME aradhanasahoo updated 500  
EXPNO 270  
PROCNO 1

F2 - Acquisition Parameters  
Date\_ 20230512  
Time 15.24 h  
INSTRUM spect  
PROBHD Z109128\_0042 (  
PULPROG zg30  
TD 65536  
SOLVENT DMSO  
NS 16  
DS 2  
SWH 10000.000 Hz  
FIDRES 0.305176 Hz  
AQ 3.2767999 sec  
RG 90.5  
DW 50.000 usec  
DE 13.04 usec  
TE 298.2 K  
D1 1.00000000 sec  
TD0 1  
SFO1 500.1830886 MHz  
NUC1 1H  
P0 5.00 usec  
P1 15.00 usec  
PLW1 4.84679985 W

F2 - Processing parameters  
SI 65536  
SF 500.1806542 MHz  
WDW EM  
SSB 0  
LB 0.30 Hz  
GB 0  
PC 1.00

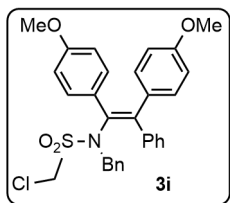

159.02  
158.35

141.61  
140.74  
135.64  
134.09  
133.23  
132.24  
130.75  
129.64  
128.77  
128.68  
128.64  
128.40  
127.74  
113.64  
113.21

77.25  
77.00  
76.74

57.24  
55.12  
55.03  
52.72

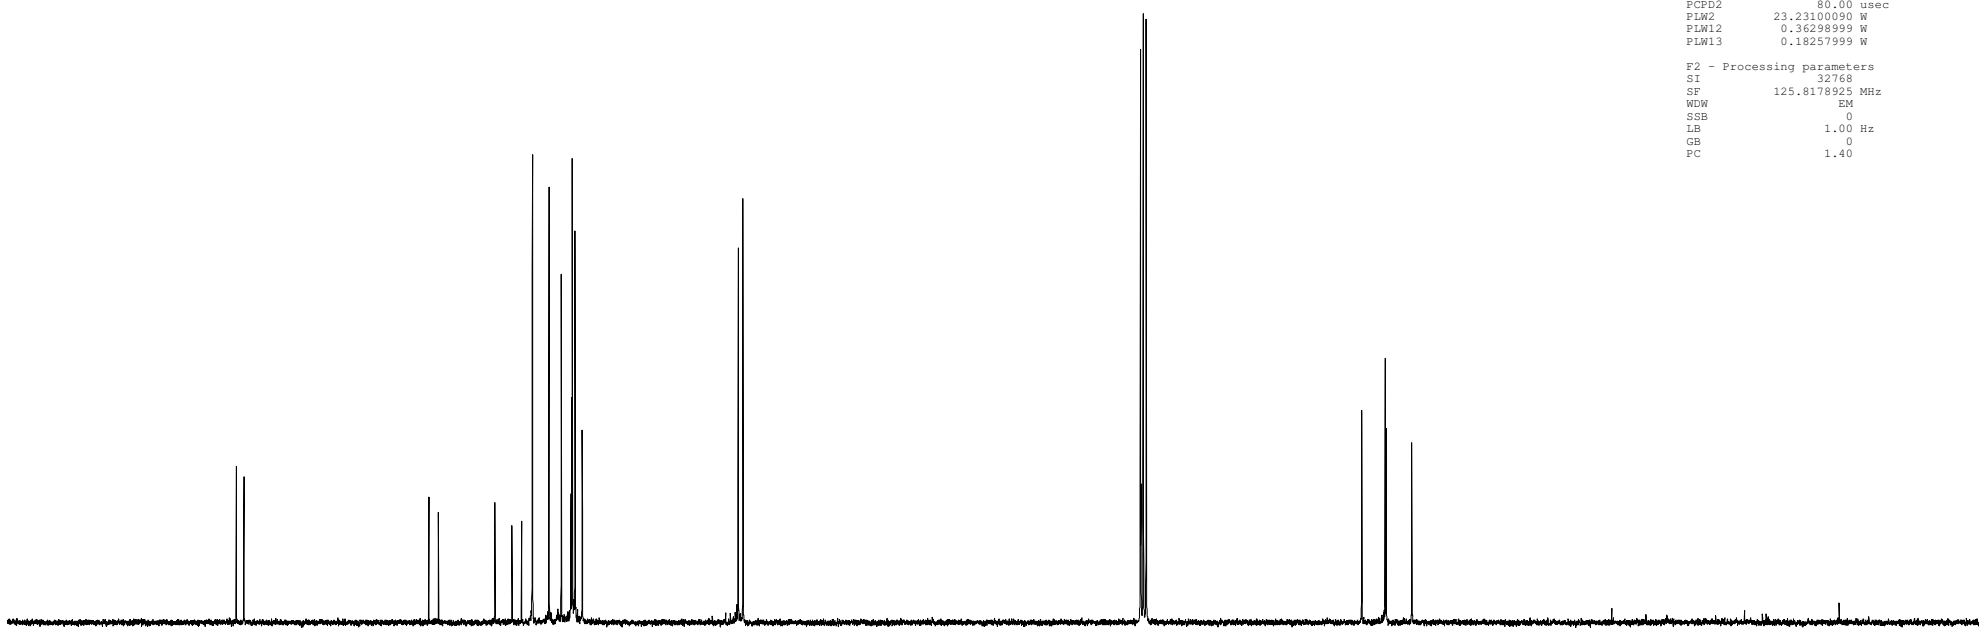

Current Data Parameters  
NAME ARADHANA SAHOO ASCEND 500  
EXPNO 19  
PROCNO 1

F2 - Acquisition Parameters  
Date\_ 20210923  
Time 15.32 h  
INSTRUM spect  
PROBHD z119470\_0291 (zgg30)  
PULPROG zgpg30  
TD 65536  
SOLVENT CDCl3  
NS 465  
DS 4  
SWH 29761.904 Hz  
FIDRES 0.908261 Hz  
AQ 1.1010048 sec  
RG 192.83  
DW 16.800 usec  
DE 6.50 usec  
TE 298.1 K  
D1 2.0000000 sec  
D11 0.03000000 sec  
TD0 1  
SFO1 125.8304669 MHz  
NUC1 13C  
P1 10.00 usec  
PLW1 115.01000214 W  
SFO2 500.3710015 MHz  
NUC2 1H  
CPDPRG2 waltz16  
PCPD2 80.00 usec  
PLW2 23.23100090 W  
PLW12 0.36298999 W  
PLW13 0.18257999 W

F2 - Processing parameters  
SI 32768  
SF 125.8178925 MHz  
WDW EM  
SSB 0  
LB 1.00 Hz  
GB 0  
PC 1.40

170 160 150 140 130 120 110 100 90 80 70 60 50 40 30 20 ppm

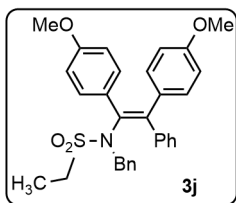

6.580  
6.569  
6.562  
6.559  
6.401  
6.394  
6.387  
6.383  
6.348  
6.344  
6.337  
6.334  
6.325  
6.067  
6.050  
5.970  
5.961  
5.955  
5.881  
5.863  
5.826  
5.809  
5.770  
5.752  
3.287  
3.258  
3.228  
3.200  
2.804  
2.744  
2.500  
1.713  
1.699  
1.686  
1.672  
1.658  
1.623  
1.619  
1.616  
1.001  
0.986  
0.973  
0.959  
0.096  
0.081  
0.066

Current Data Parameters  
NAME aradhanasahoo updated 500  
EXPNO 260  
PROCNO 1

F2 - Acquisition Parameters  
Date\_ 20230512  
Time 15.29 h  
INSTRUM spect  
PROBHD 2109128\_0042 (  
PULPROG zg30  
TD 65536  
SOLVENT DMSO  
NS 16  
DS 2  
SWH 10000.000 Hz  
FIDRES 0.305176 Hz  
AQ 3.2767999 sec  
RG 32  
DW 50.000 usec  
DE 13.04 usec  
TE 298.2 K  
D1 1.0000000 sec  
TD0 1  
SFO1 500.1830886 MHz  
NUC1 1H  
P0 5.00 usec  
P1 15.00 usec  
PLW1 4.84679985 W

F2 - Processing parameters  
SI 65536  
SF 500.1804445 MHz  
WDW EM  
SSB 0  
LB 0.30 Hz  
GB 0  
PC 1.00

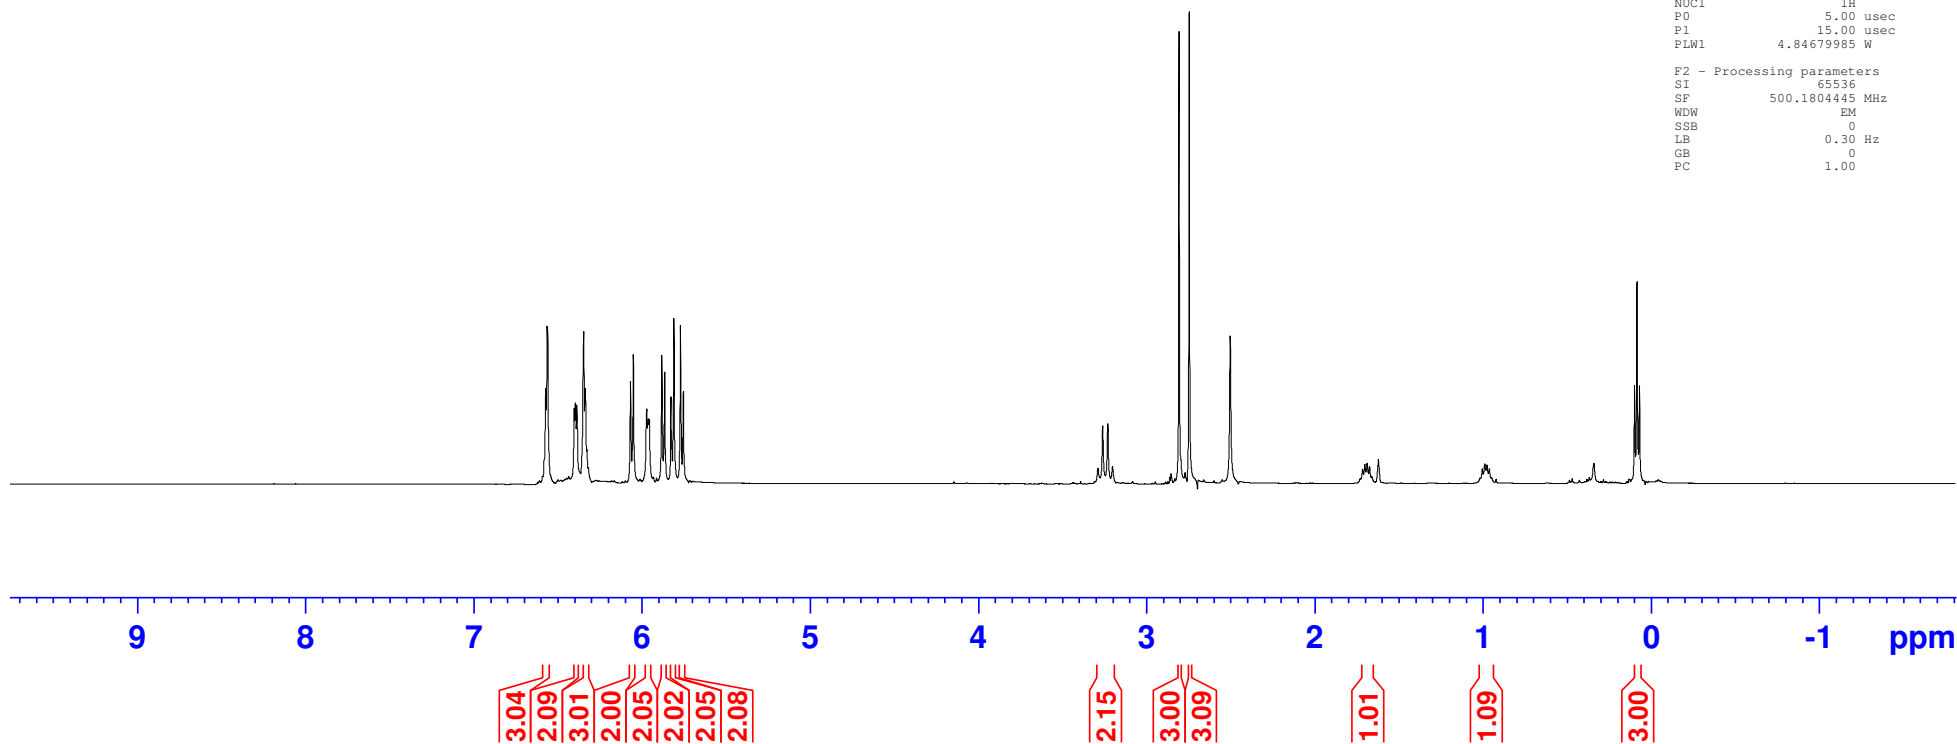

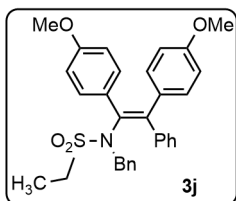

158.77  
158.13

142.23  
140.18  
136.53  
134.56  
134.18  
132.40  
132.27  
130.36  
129.82  
129.41  
128.64  
128.31  
128.02  
127.20  
113.45  
113.10

77.25  
76.99  
76.74

55.07  
54.99  
51.91  
49.36

7.76

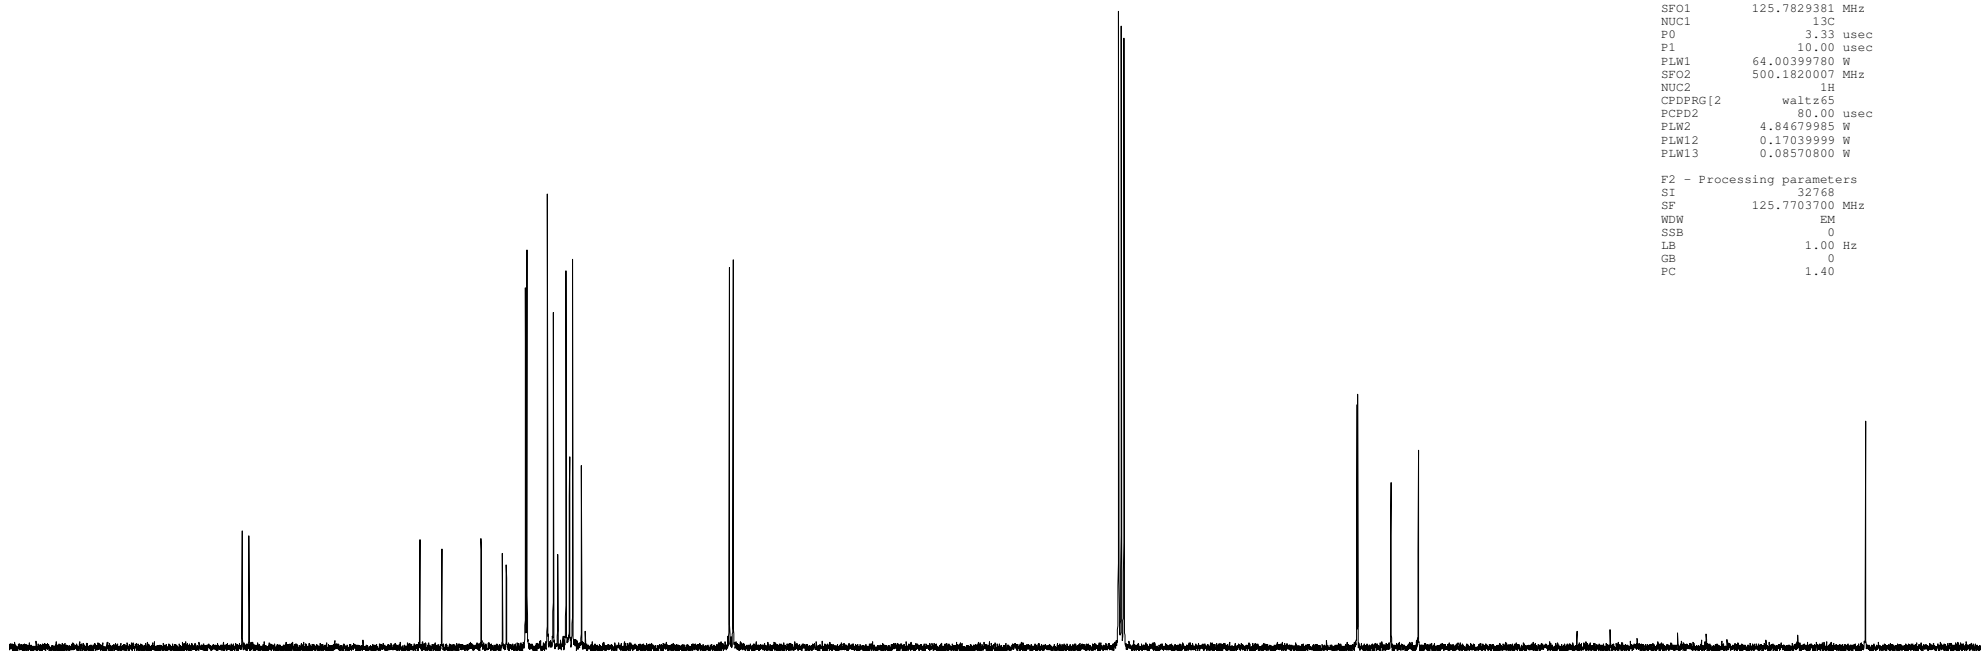

Current Data Parameters  
NAME aradhanasahoo updated 500  
EXPNO 35  
PROCNO 1

F2 - Acquisition Parameters  
Date\_ 20210925  
Time 11.24 h  
INSTRUM spect  
PROBHD Z109128\_0042 ( )  
PULPROG zgpg30  
TD 65536  
SOLVENT CDCl3  
NS 392  
DS 4  
SWH 29761.904 Hz  
FIDRES 0.908261 Hz  
AQ 1.1010048 sec  
RG 203  
DW 16.800 usec  
DE 6.50 usec  
TE 298.3 K  
D1 2.0000000 sec  
D11 0.0300000 sec  
TD0 1  
SFO1 125.7829381 MHz  
NUC1 13C  
P0 3.33 usec  
F1 10.00 usec  
PLW1 64.00399780 W  
SFO2 500.1820007 MHz  
NUC2 1H  
CPDPRG[2] waltz65  
FCPD2 80.00 usec  
PLW2 4.84679985 W  
PLW12 0.17039999 W  
PLW13 0.08570800 W

F2 - Processing parameters  
SI 32768  
SF 125.7703700 MHz  
WDW EM  
SSB 0  
LB 1.00 Hz  
GB 0  
FC 1.40

170 160 150 140 130 120 110 100 90 80 70 60 50 40 30 20 10 ppm

7.436  
7.430  
7.423  
7.306  
7.301  
7.293  
7.276  
7.244  
7.241  
7.239  
7.231  
7.227  
7.221  
7.212  
7.207  
7.201  
7.193  
7.141  
7.137  
7.130  
7.122  
7.116  
7.099  
7.069  
7.055  
6.861  
6.844  
6.755  
6.737  
6.624  
6.618  
6.614  
6.604  
6.600  
6.595  
4.330  
4.301  
4.217  
4.188  
3.780  
3.715  
3.517  
3.490  
2.783  
2.756

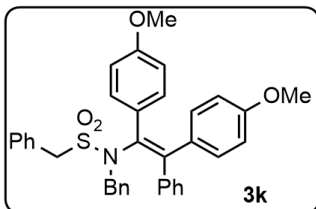

Current Data Parameters  
NAME ARADHANA SAHOO ASCEND 500  
EXPNO 183  
PROCNO 1

F2 - Acquisition Parameters  
Date\_ 20221208  
Time 14.42 h  
INSTRUM spect  
PROBHD Z119470\_0291 (1  
PULPROG zg30  
TD 65536  
SOLVENT CDCl3  
NS 16  
DS 2  
SWH 10000.000 Hz  
FIDRES 0.305176 Hz  
AQ 3.2767999 sec  
RG 31.25  
DW 50.000 usec  
DE 6.50 usec  
TE 298.9 K  
D1 1.0000000 sec  
TD0 1  
SFO1 500.3720899 MHz  
NUC1 1H  
P1 10.00 usec  
PLW1 23.23100090 W

F2 - Processing parameters  
SI 65536  
SF 500.3690118 MHz  
WDW EM  
SSB 0  
LB 0.30 Hz  
GB 0  
PC 1.00

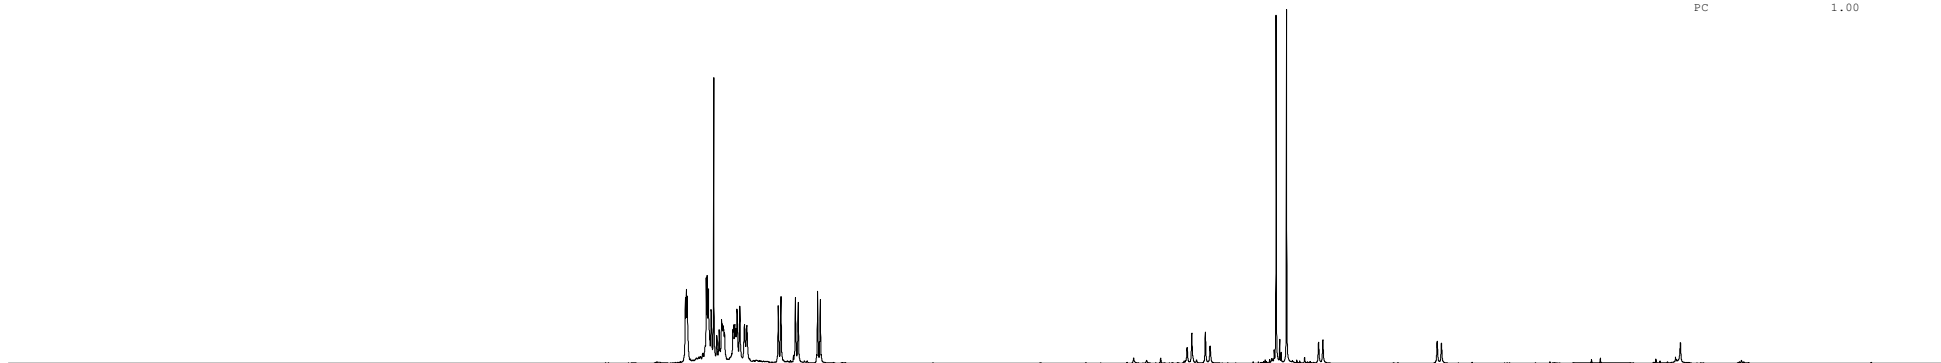

11 10 9 8 7 6 5 4 3 2 1 ppm

3.05  
5.04  
1.05  
2.18  
1.02  
1.11  
2.09  
2.09  
2.01  
2.02  
2.03  
1.05  
1.09  
3.08  
3.00  
1.04  
1.01

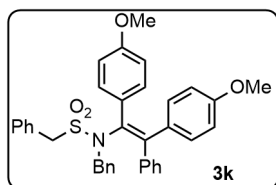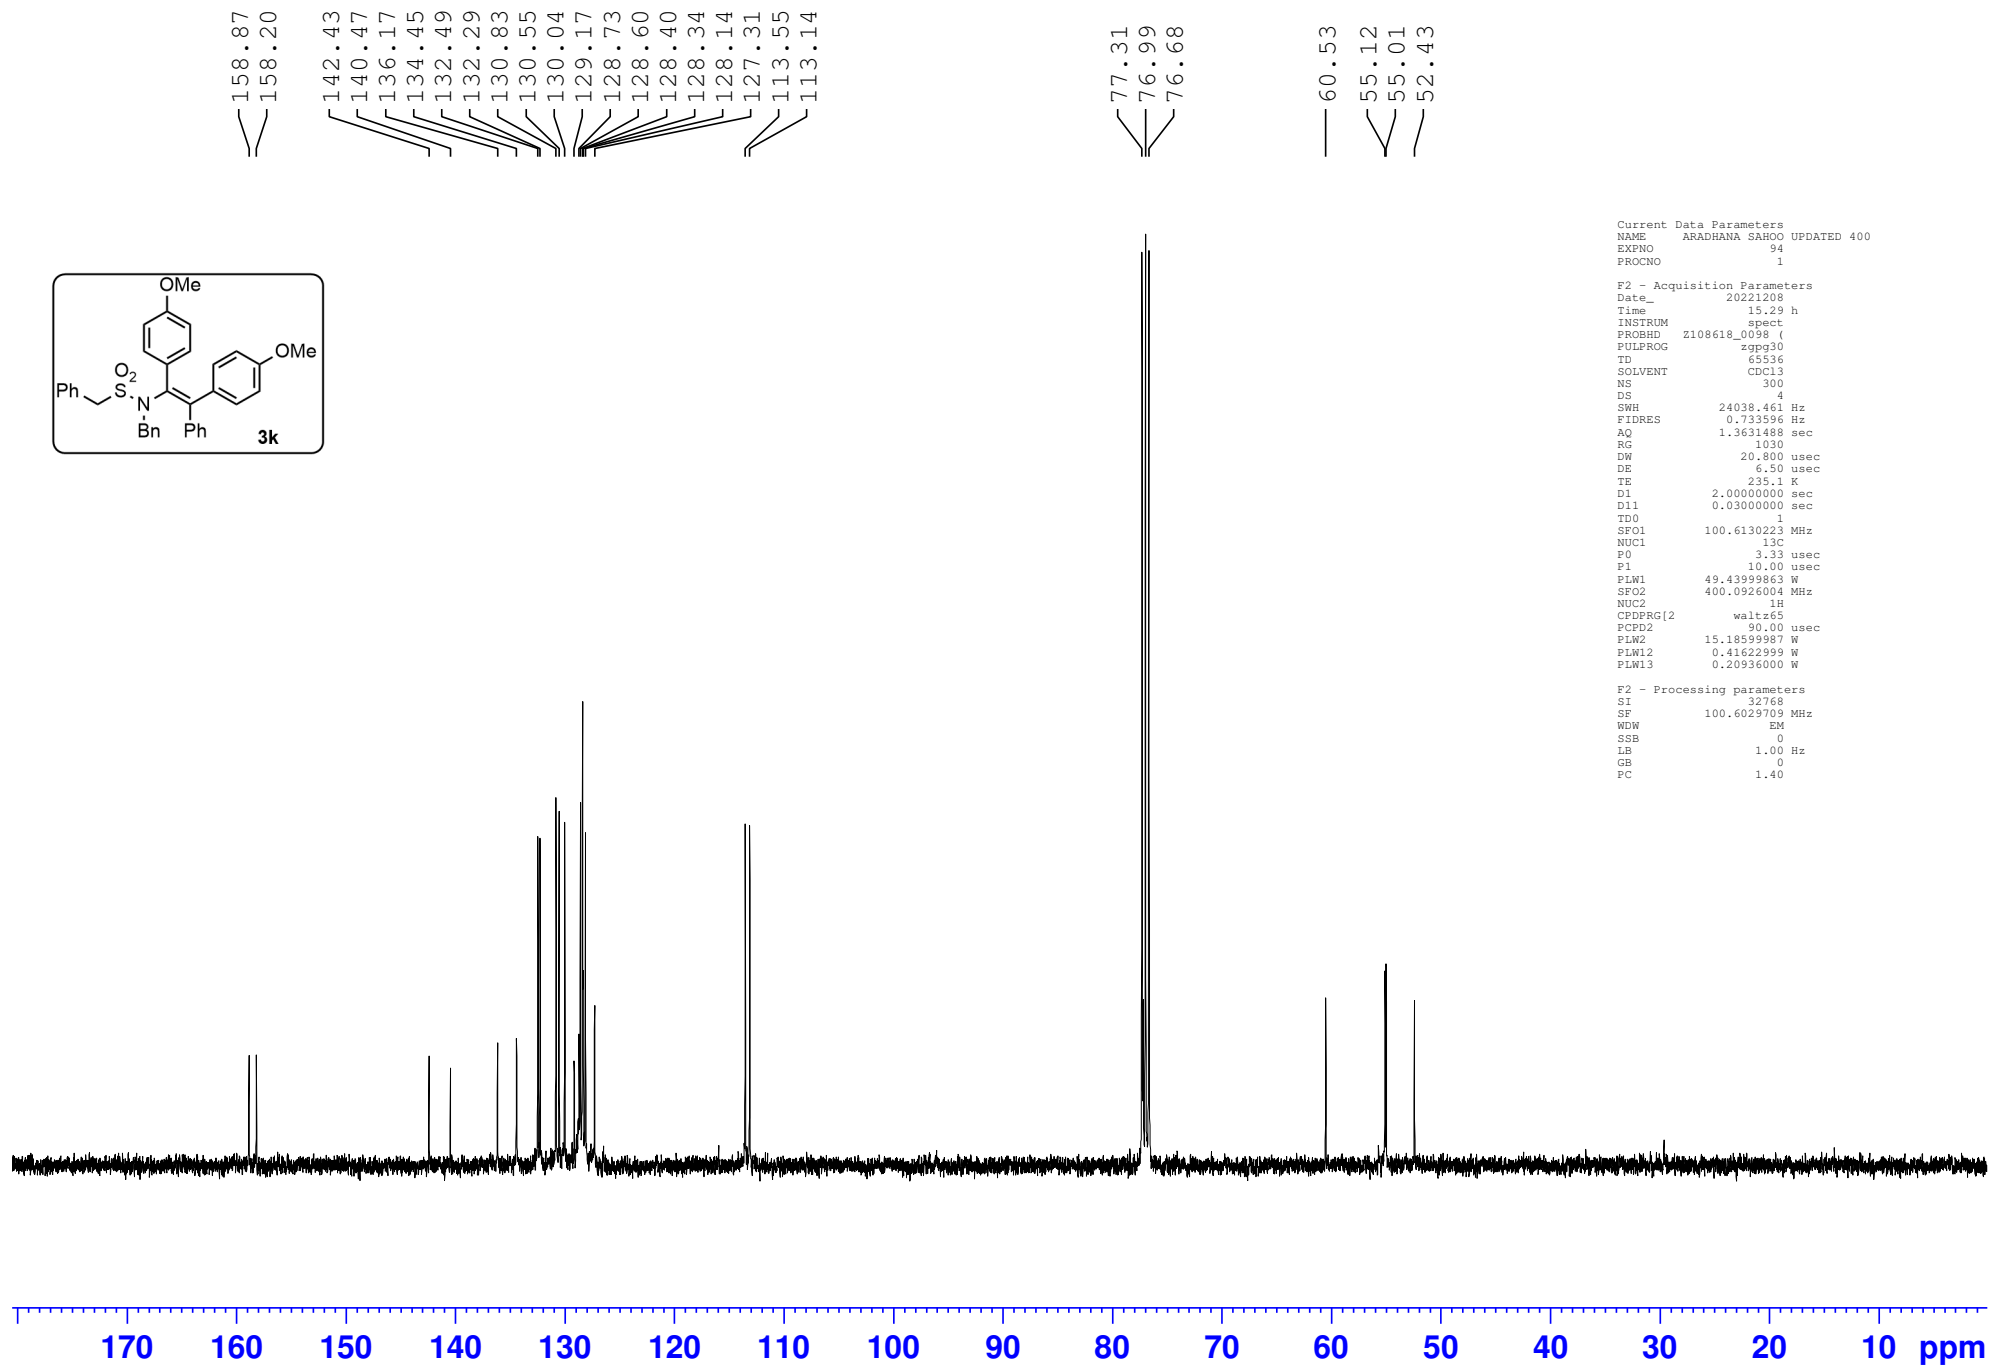



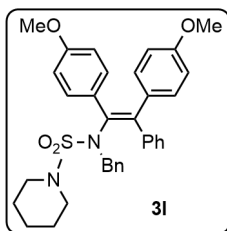

7.467  
7.460  
7.457  
7.195  
7.190  
7.182  
7.175  
7.160  
7.143  
7.135  
7.128  
7.086  
7.070  
6.781  
6.764  
6.665  
6.651  
6.632  
6.627

4.022  
3.994  
3.892  
3.864  
3.713  
3.628  
3.366  
2.544  
2.534  
2.524  
2.511  
2.508  
2.505  
1.374  
1.365  
1.303  
1.294  
1.236

```

Current Data Parameters
NAME      aradhanasahoo updated 500
EXPNO    271
PROCNO    1

F2 - Acquisition Parameters
Date_    20230515
Time     10.07 h
INSTRUM  spect
PROBHD   z109128_0042 (
PULPROG  zg30
TD        65536
SOLVENT  DMSO
NS        16
DS        2
SWH       10000.000 Hz
FIDRES    0.305176 Hz
AQ        3.2767999 sec
RG        101
DW        50.000 usec
DE        13.04 usec
TE        304.6 K
D1        1.00000000 sec
TD0       1
SFO1     500.1830886 MHz
NUC1      1H
P0        5.00 usec
P1        15.00 usec
PLW1     4.84679985 W

F2 - Processing parameters
SI        65536
SF        500.1800000 MHz
WDW       EM
SSB       0
LB        0.30 Hz
GB        0
PC        1.00
  
```

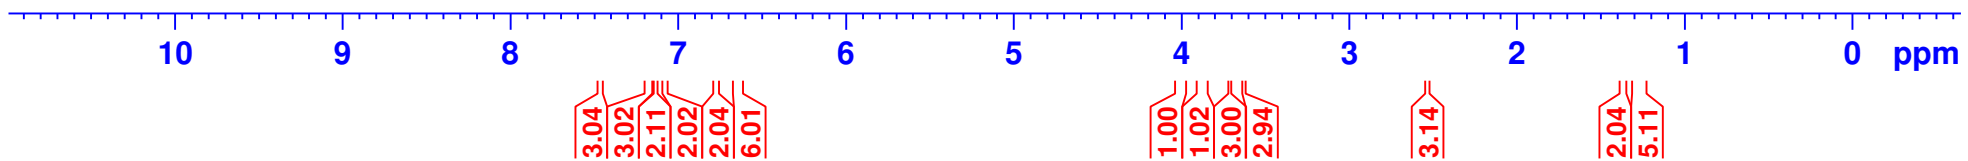

ARS-1-216

158.68  
158.02  
142.56  
142.27  
136.40  
135.17  
133.92  
132.96  
132.30  
130.57  
130.31  
129.71  
128.34  
128.11  
127.94  
127.59  
126.76  
113.26  
112.96

77.25  
77.00  
76.74

55.09  
54.99  
51.37  
46.89  
46.35

25.49  
23.79

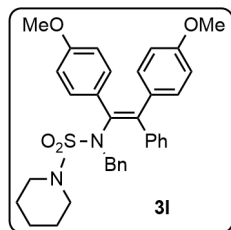

Current Data Parameters  
NAME ARADHANA SAHOO ASCEND 500  
EXPNO 17  
PROCNO 1

F2 - Acquisition Parameters  
Date\_ 20210917  
Time 10.35 h  
INSTRUM spect  
PROBHD Z119470\_0291 ( )  
PULPROG zgpg30  
TD 65536  
SOLVENT CDCl3  
NS 585  
DS 4  
SWH 29761.904 Hz  
FIDRES 0.908261 Hz  
AQ 1.1010048 sec  
RG 108.78  
DW 16.800 usec  
DE 6.50 usec  
TE 300.8 K  
D1 2.0000000 sec  
D11 0.0300000 sec  
TD0 1  
SFO1 125.8304669 MHz  
NUC1 13C  
P1 10.00 usec  
PLW1 115.0100214 W  
SFO2 500.3710015 MHz  
NUC2 1H  
PCPD2 waltz16  
PCPD2 80.00 usec  
PLW2 23.23100090 W  
PLW12 0.36238999 W  
PLW13 0.18257999 W

F2 - Processing parameters  
SI 32768  
SF 125.8178898 MHz  
WDW EM  
SSB 0  
LB 1.00 Hz  
GB 0  
PC 1.40

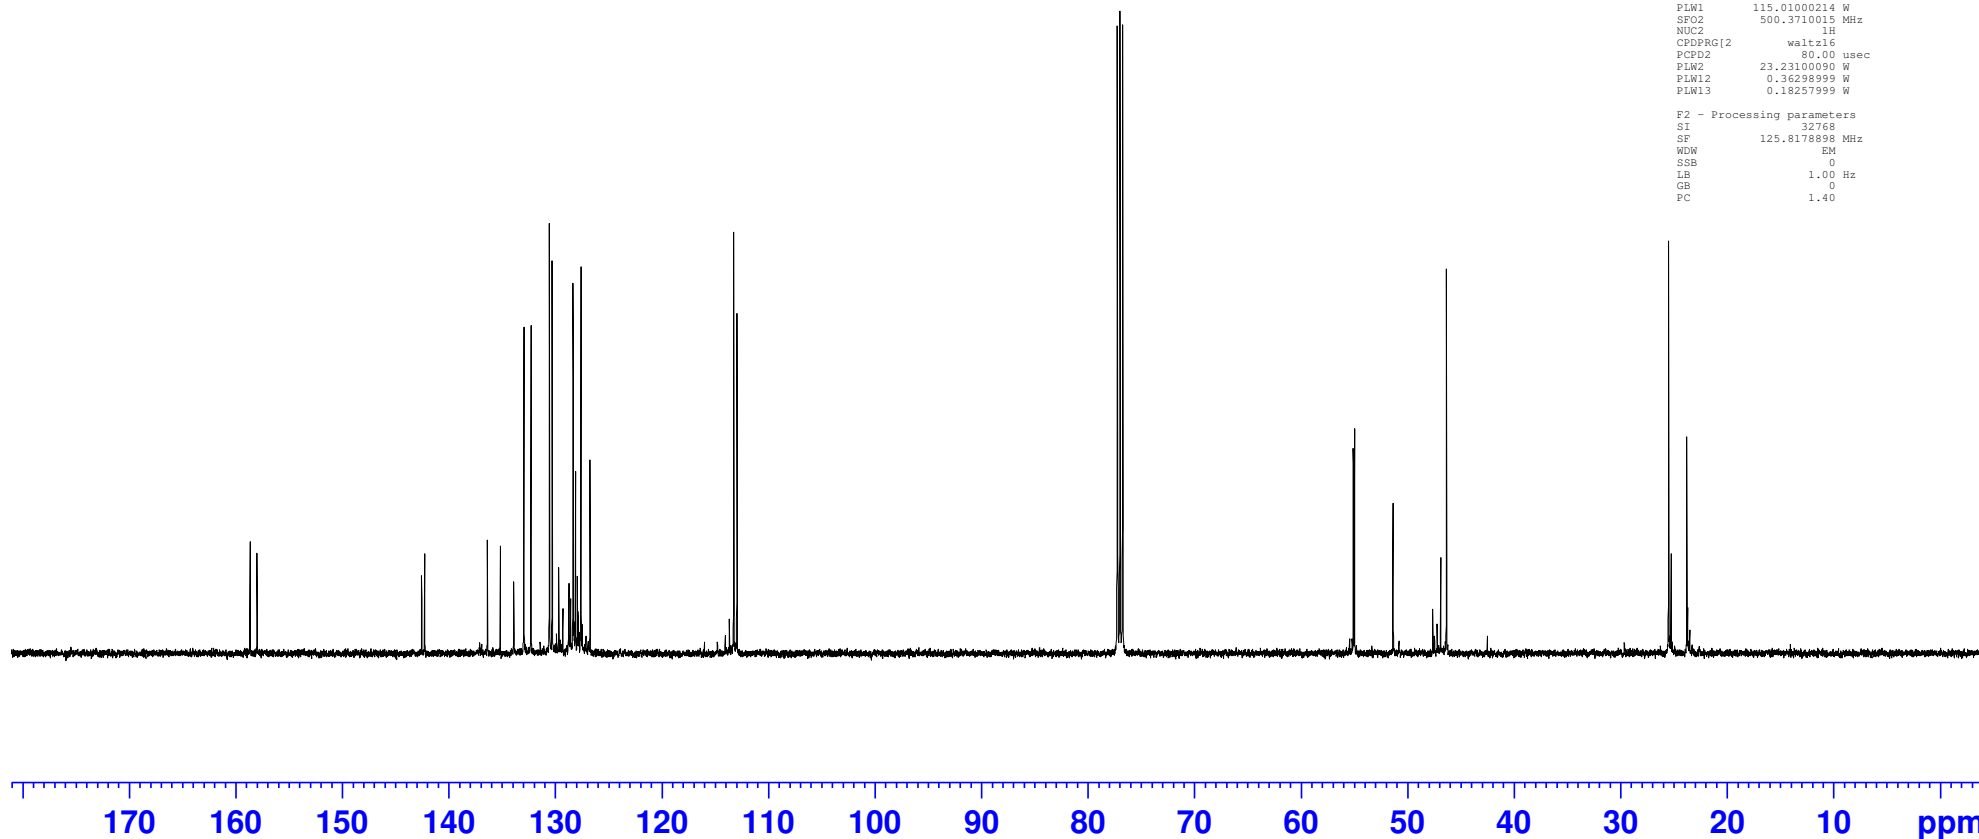

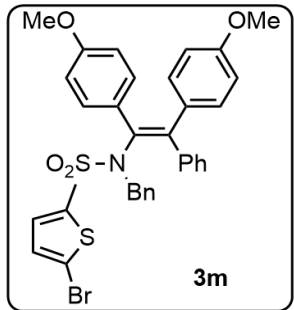

7.401  
7.385  
7.371  
7.345  
7.339  
7.333  
7.183  
7.175  
7.151  
7.144  
7.088  
7.075  
6.897  
6.888  
6.686  
6.668  
6.663  
6.644  
6.583  
6.565  
6.553  
6.535  
4.422  
4.393  
3.975  
3.946  
3.667  
3.644  
3.359  
2.511  
2.508  
2.505

Current Data Parameters  
 NAME aradhanasahoo updated 500  
 EXPNO 298  
 PROCNO 1

F2 - Acquisition Parameters  
 Date\_ 20230620  
 Time 10.54 h  
 INSTRUM spect  
 PROBHD z109128\_0042 (  
 PULPROG zg30  
 TD 65536  
 SOLVENT DMSO  
 NS 256  
 DS 2  
 SWH 10000.000 Hz  
 FIDRES 0.305176 Hz  
 AQ 3.2767999 sec  
 RG 114  
 DW 50.000 usec  
 DE 13.04 usec  
 TE 298.4 K  
 D1 1.00000000 sec  
 TD0 1  
 SF01 500.1830886 MHz  
 NUC1 1H  
 P0 5.00 usec  
 P1 15.00 usec  
 PLW1 4.84679985 W

F2 - Processing parameters  
 SI 65536  
 SF 500.1800000 MHz  
 WDW EM  
 SSB 0  
 LB 0.30 Hz  
 GB 0  
 PC 1.00

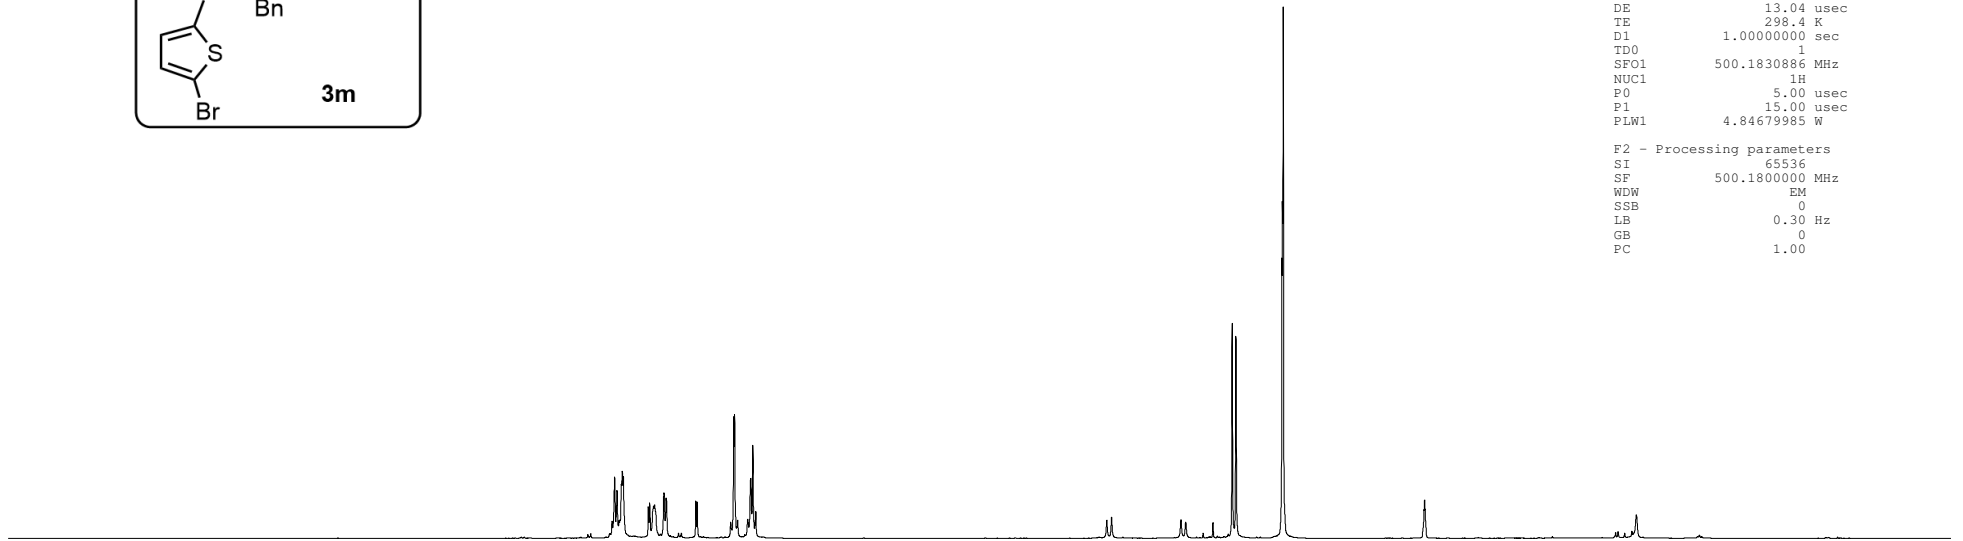

10 9 8 7 6 5 4 3 2 1 0 ppm

3.02  
3.08  
1.03  
2.10  
2.10  
1.05  
4.37  
4.23

1.00  
1.02  
3.07  
3.10

159.01  
158.39  
142.91  
141.88  
140.92  
135.79  
134.39  
133.37  
133.20  
132.58  
132.30  
131.20  
130.94  
130.55  
129.80  
129.40  
129.03  
129.00  
128.80  
128.14  
119.93  
114.30  
113.85  
113.56

55.99  
55.52  
55.38  
52.09  
40.50  
40.33  
40.26  
40.17  
40.00  
39.83  
39.67  
39.50  
26.85

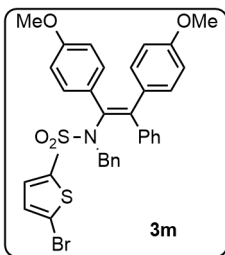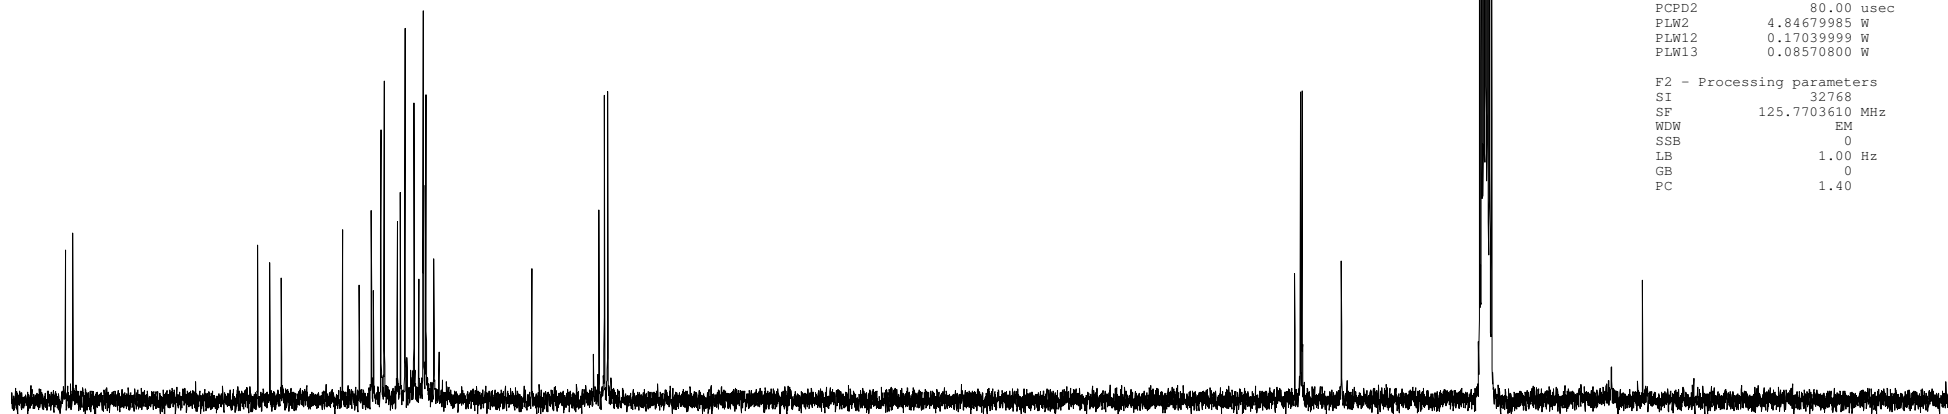

```

Current Data Parameters
NAME      aradhana student 400 MHz
EXPNO     128
PROCNO    1

F2 - Acquisition Parameters
Date_     20230515
Time      17.18 h
INSTRUM   spect
PROBHD    Z109128_0042 (
PULPROG   zgpg30
TD         65536
SOLVENT   DMSO
NS         1024
DS         4
SWH        29761.904 Hz
FIDRES     0.908261 Hz
AQ         1.1010048 sec
RG         203
DW         16.800 usec
DE         6.50 usec
TE         304.2 K
D1         2.0000000 sec
D11        0.0300000 sec
TD0        1
SFO1       125.7829381 MHz
NUC1       13C
P0         3.33 usec
P1         10.00 usec
PLW1       64.00399780 W
SFO2       500.1820007 MHz
NUC2       1H
CPDPRG[2] waltz65
PCPD2      80.00 usec
PLW2       4.84679985 W
PLW12      0.17039999 W
PLW13      0.08570800 W

F2 - Processing parameters
SI         32768
SF         125.7703610 MHz
WDW        EM
SSB        0
LB         1.00 Hz
GB         0
PC         1.40
  
```

160 150 140 130 120 110 100 90 80 70 60 50 40 30 20 10 ppm

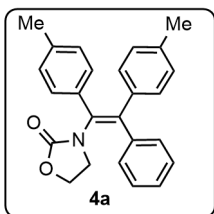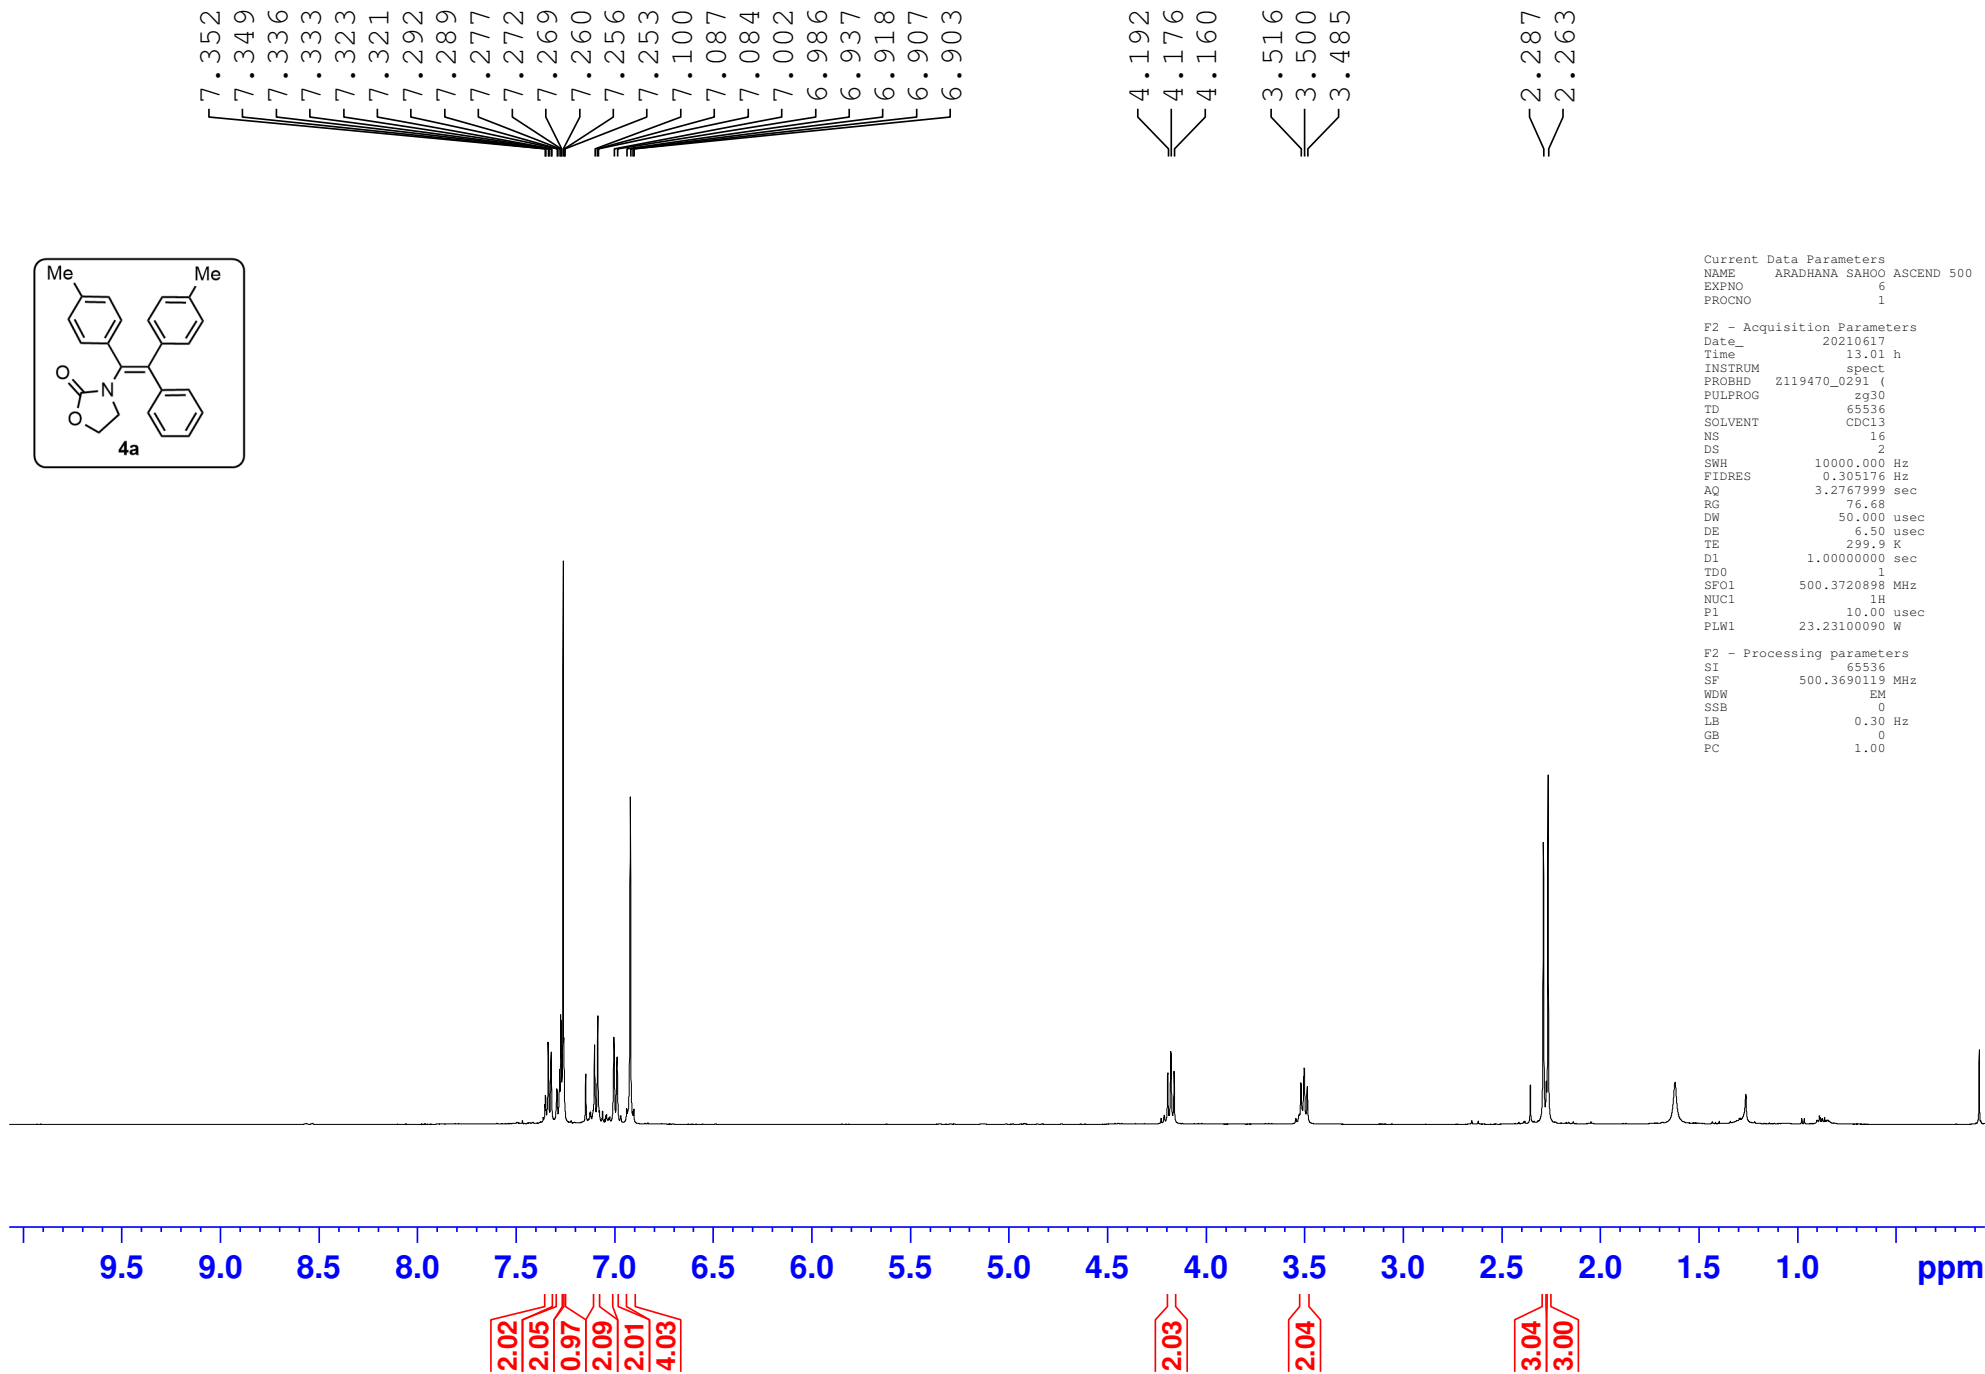

```

Current Data Parameters
NAME      ARADHANA SAHOO ASCEND 500
EXPNO    6
PROCNO   1

F2 - Acquisition Parameters
Date_    20210617
Time     13.01 h
INSTRUM  spect
PROBHD   Z119470_0291 (
PULPROG  zg30
TD        65536
SOLVENT  CDC13
NS        16
DS        2
SWH       10000.000 Hz
FIDRES    0.305176 Hz
AQ        3.2767999 sec
RG        76.68
DW        50.000 usec
DE        6.50 usec
TE        299.9 K
D1        1.00000000 sec
TD0       1
SF01      500.3720898 MHz
NUCL1     1H
P1        10.00 usec
PLW1      23.23100090 W

F2 - Processing parameters
SI        65536
SF        500.3690119 MHz
WDW       EM
SSB       0
LB        0.30 Hz
GB        0
PC        1.00
  
```

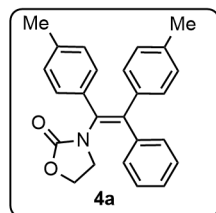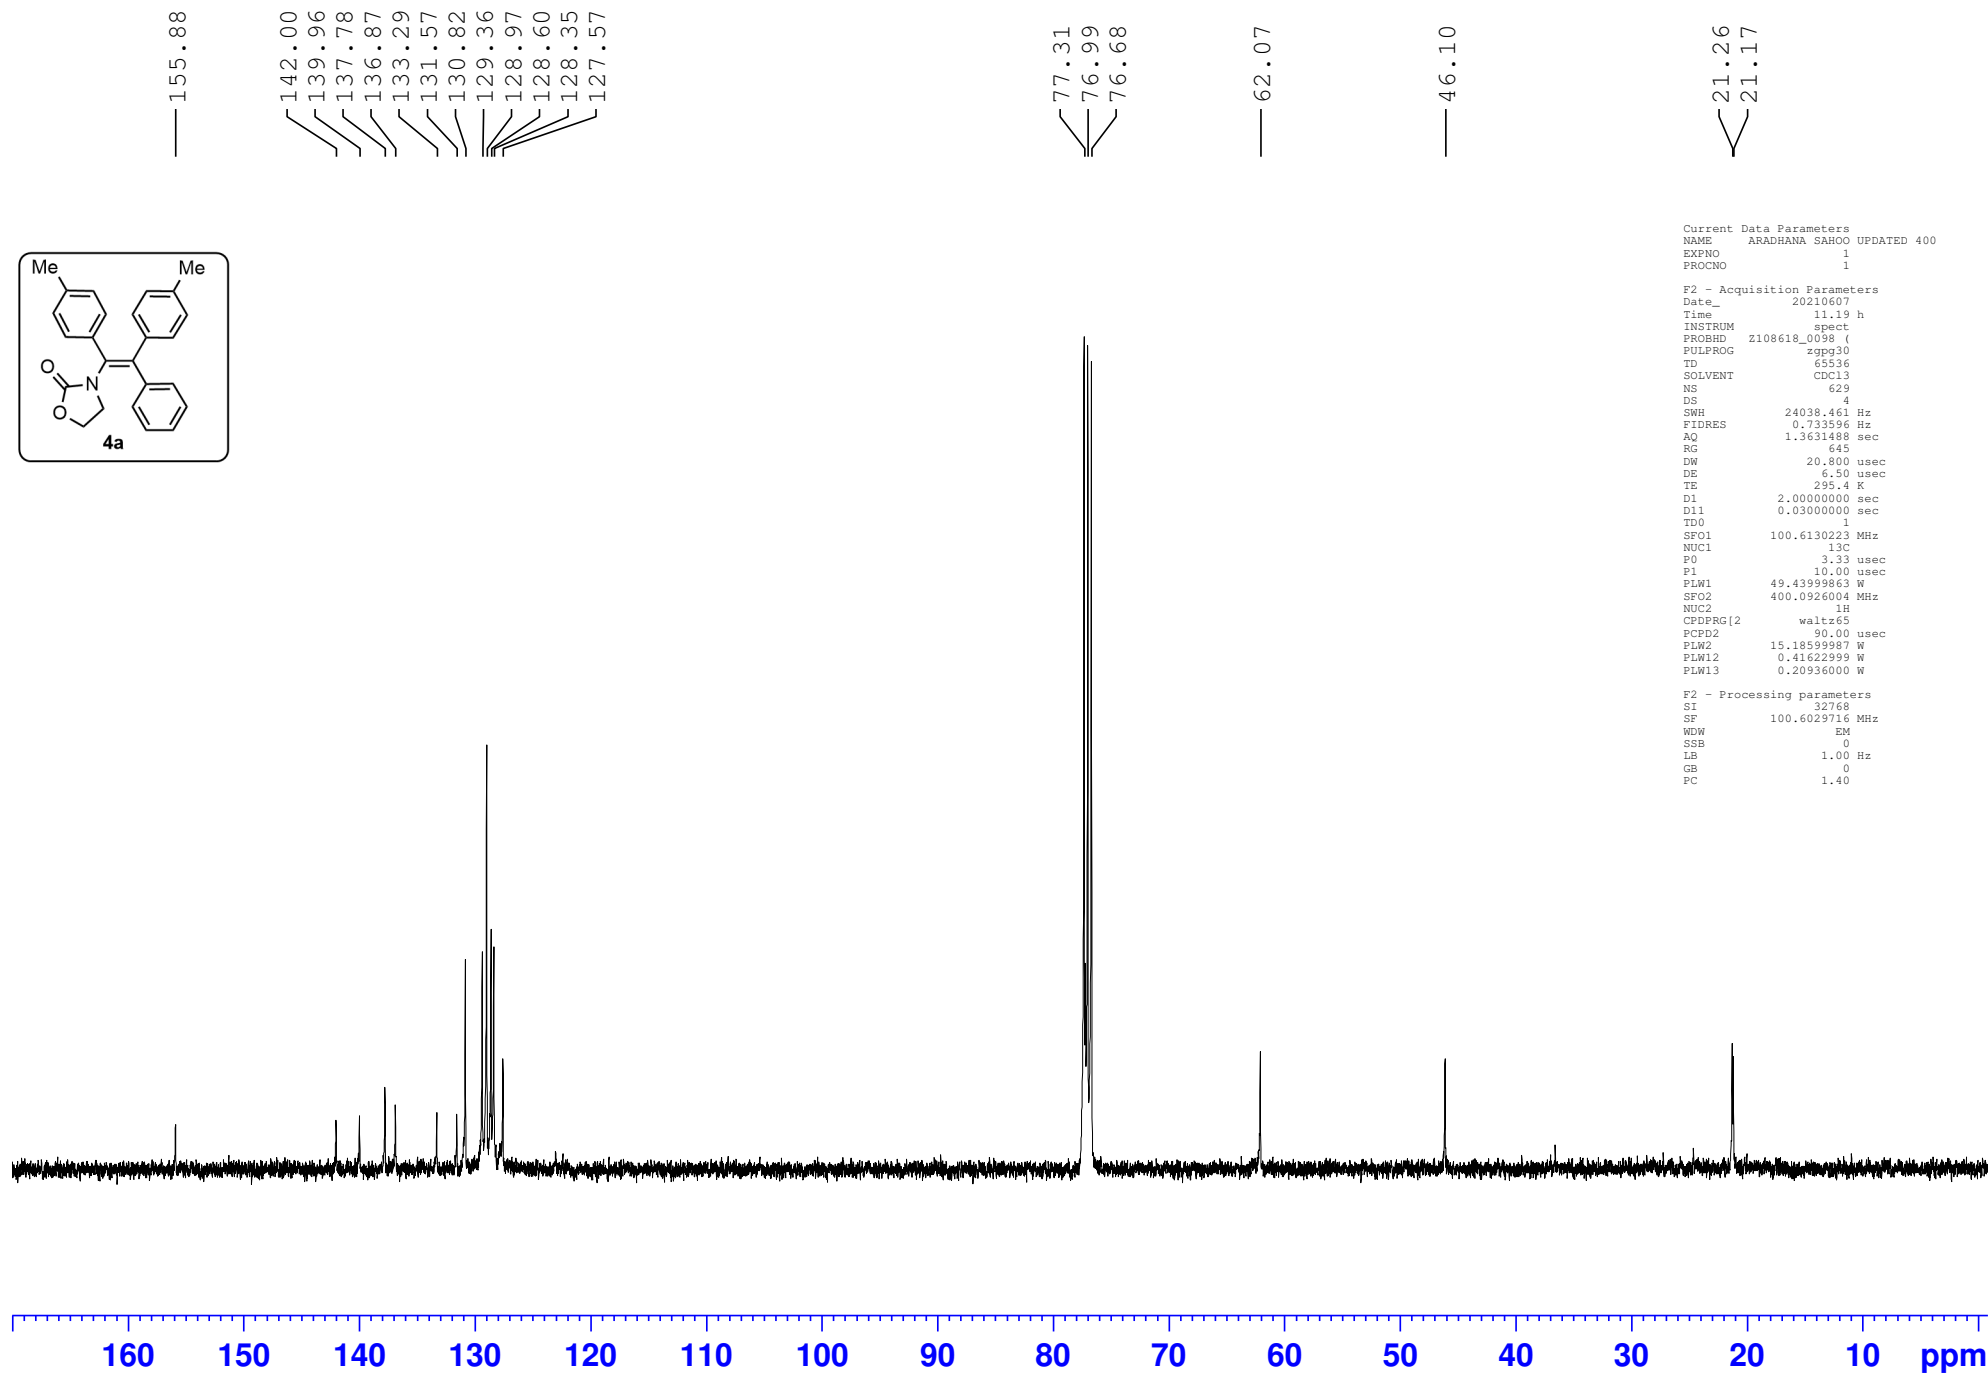

155.88

142.00  
139.96  
137.78  
136.87  
133.29  
131.57  
130.82  
129.36  
128.97  
128.60  
128.35  
127.57

77.31  
76.99  
76.68

62.07

46.10

21.26  
21.17

Current Data Parameters  
NAME ARADHANA SAHOO UPDATED 400  
EXPNO 1  
PROCNO 1

F2 - Acquisition Parameters  
Date\_ 20210607  
Time 11.19 h  
INSTRUM spect  
PROBHD Z108618\_0098 ( )  
PULPROG zgpg30  
TD 65536  
SOLVENT CDCl3  
NS 629  
DS 4  
SWH 24038.461 Hz  
FIDRES 0.733596 Hz  
AQ 1.3631488 sec  
RG 645  
DW 20.800 usec  
DE 6.50 usec  
TE 295.4 K  
D1 2.0000000 sec  
D11 0.0300000 sec  
TDO 1  
SFO1 100.6130223 MHz  
NUC1 13C  
P0 3.33 usec  
P1 10.00 usec  
PLW1 49.43999863 W  
SFO2 400.0926004 MHz  
NUC2 1H  
CPDPRG2 waltz65  
PCPD2 90.00 usec  
PLW2 15.18599887 W  
PLW12 0.41622999 W  
PLW13 0.20936000 W

F2 - Processing parameters  
SI 32768  
SF 100.6029716 MHz  
WDW EM  
SSB 0  
LB 1.00 Hz  
GB 0  
PC 1.40

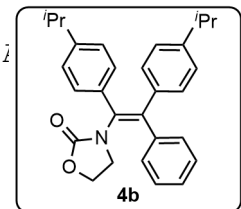

7.354  
7.351  
7.341  
7.339  
7.331  
7.324  
7.290  
7.283  
7.281  
7.277  
7.270  
7.266  
7.265  
7.260  
7.119  
7.114  
7.111  
7.101  
7.098  
7.094  
7.033  
7.016  
6.967  
6.950  
6.937  
6.933  
6.924  
6.920  
4.190  
4.175  
4.158  
3.527  
3.511  
3.495  
2.863  
2.849  
2.835  
2.824  
2.822  
2.811  
2.797  
2.784

1.209  
1.195  
1.192  
1.178

Current Data Parameters  
NAME aradhanasahoo updated 500  
EXPNO 50  
PROCNO 1

F2 - Acquisition Parameters  
Date\_ 20211025  
Time 13.06 h  
INSTRUM spect  
PROBHD Z109128\_0042 (   
PULPROG zg30  
TD 65536  
SOLVENT CDCl3  
NS 16  
DS 2  
SWH 10000.000 Hz  
FIDRES 0.305176 Hz  
AQ 3.2767999 sec  
RG 128  
DW 50.000 usec  
DE 13.04 usec  
TE 298.5 K  
D1 1.00000000 sec  
TDO 1  
SFO1 500.1830886 MHz  
NUC1 1H  
FO 5.00 usec  
P1 15.00 usec  
PLW1 4.84679985 W

F2 - Processing parameters  
SI 65536  
SF 500.1800110 MHz  
WDW EM  
SSB 0  
LB 0.30 Hz  
GB 0  
PC 1.00

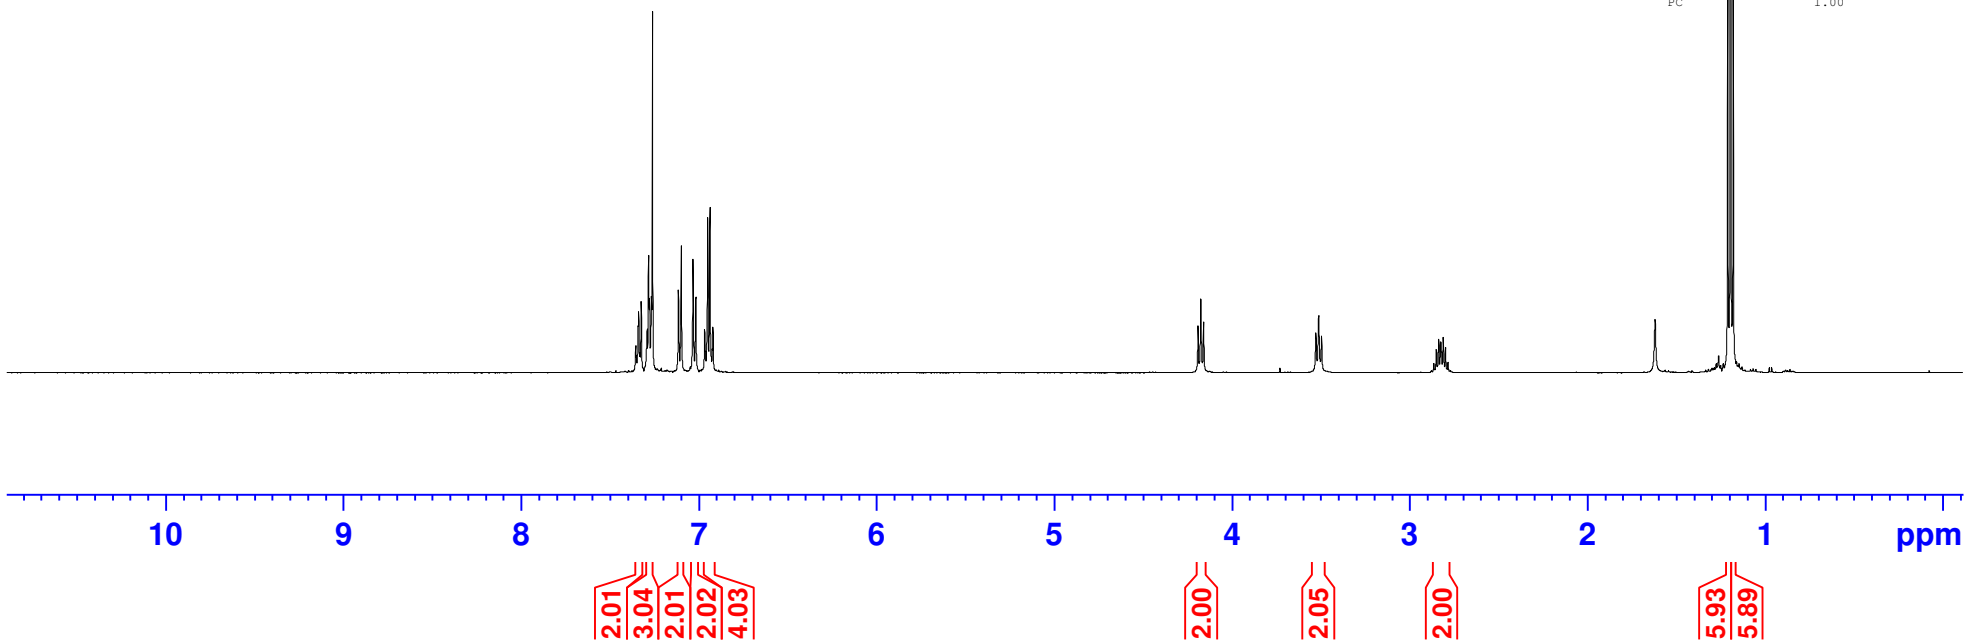

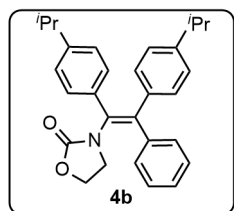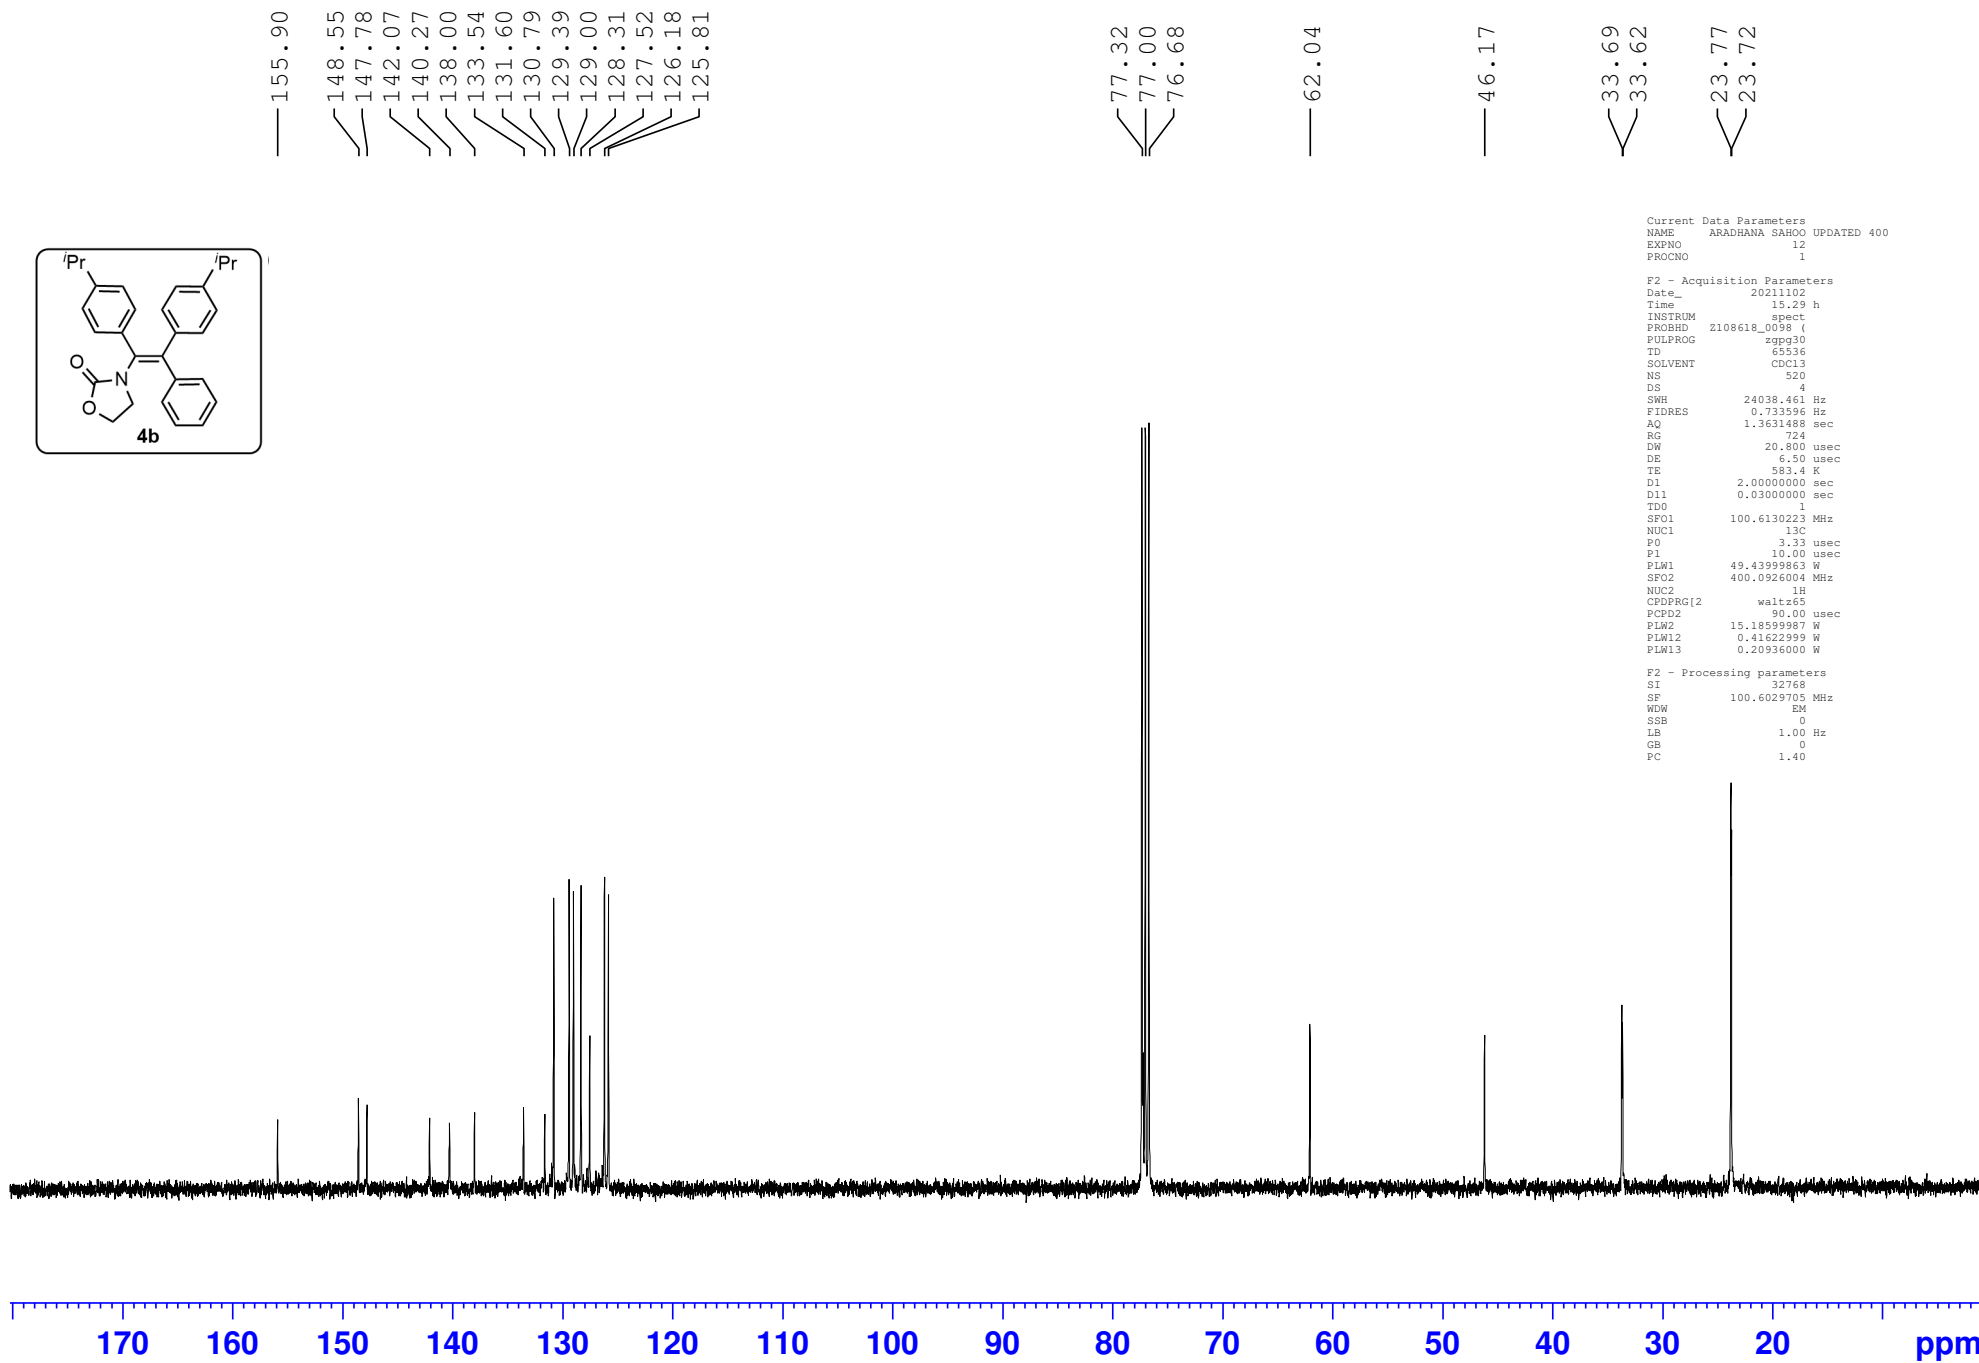

```

Current Data Parameters
NAME      ARADHANA SAHOO UPDATED 400
EXPNO    12
PROCNO   1

F2 - Acquisition Parameters
Date_    20211102
Time     15.29 h
INSTRUM  spect
PROBHD   Z108618_0098 (
PULPROG  zgpg30
TD       65536
SOLVENT  CDCl3
NS       520
DS       4
SWH      24038.461 Hz
FIDRES   0.733596 Hz
AQ       1.3631488 sec
RG       724
DW       20.800 usec
DE       6.50 usec
TE       583.4 K
D1       2.0000000 sec
D11      0.0300000 sec
TDO      1
SFO1     100.6130223 MHz
NUC1     13C
P0       3.33 usec
P1       10.00 usec
PLW1     49.43999863 W
SFO2     400.0926004 MHz
NUC2     1H
CPDPRG2  waltz165
PCPD2    90.00 usec
PLW2     15.18599987 W
PLW12    0.41622999 W
PLW13    0.20936000 W

F2 - Processing parameters
SI       32768
SF       100.6029705 MHz
WDW      EM
SSB      0
LB       1.00 Hz
GB       0
PC       1.40
  
```



7.396  
7.393  
7.389  
7.383  
7.379  
7.376  
7.367  
7.364  
7.360  
7.348  
7.345  
7.342  
7.336  
7.331  
7.325  
7.319  
7.316  
7.314  
7.263  
7.260  
7.256  
7.249  
7.246  
7.244  
7.227  
7.222  
7.217  
7.208  
7.204  
7.198  
7.058  
7.056  
7.040  
7.037  
7.033  
7.024  
7.019  
7.015  
6.984  
6.968  
4.237  
4.221  
4.205  
3.520  
3.504  
3.488

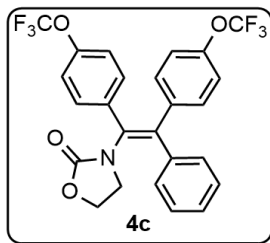

Current Data Parameters  
 NAME ARADHANA SAHOO ASCEND 500  
 EXPNO 33  
 PROCNO 1

F2 - Acquisition Parameters  
 Date\_ 20211111  
 Time 14.17 h  
 INSTRUM spect  
 PROBHD z119470\_0291 ( )  
 PULPROG zg30  
 TD 65536  
 SOLVENT CDC13  
 NS 16  
 DS 2  
 SWH 10000.000 Hz  
 FIDRES 0.305176 Hz  
 AQ 3.2767999 sec  
 RG 54.81  
 DW 50.000 usec  
 DE 6.50 usec  
 TE 295.6 K  
 D1 1.00000000 sec  
 TD0 1  
 SFO1 500.3720898 MHz  
 NUC1 1H  
 P1 10.00 usec  
 PLW1 23.23100090 W

F2 - Processing parameters  
 SI 65536  
 SF 500.3690121 MHz  
 WDW EM  
 SSB 0  
 LB 0.30 Hz  
 GB 0  
 PC 1.00

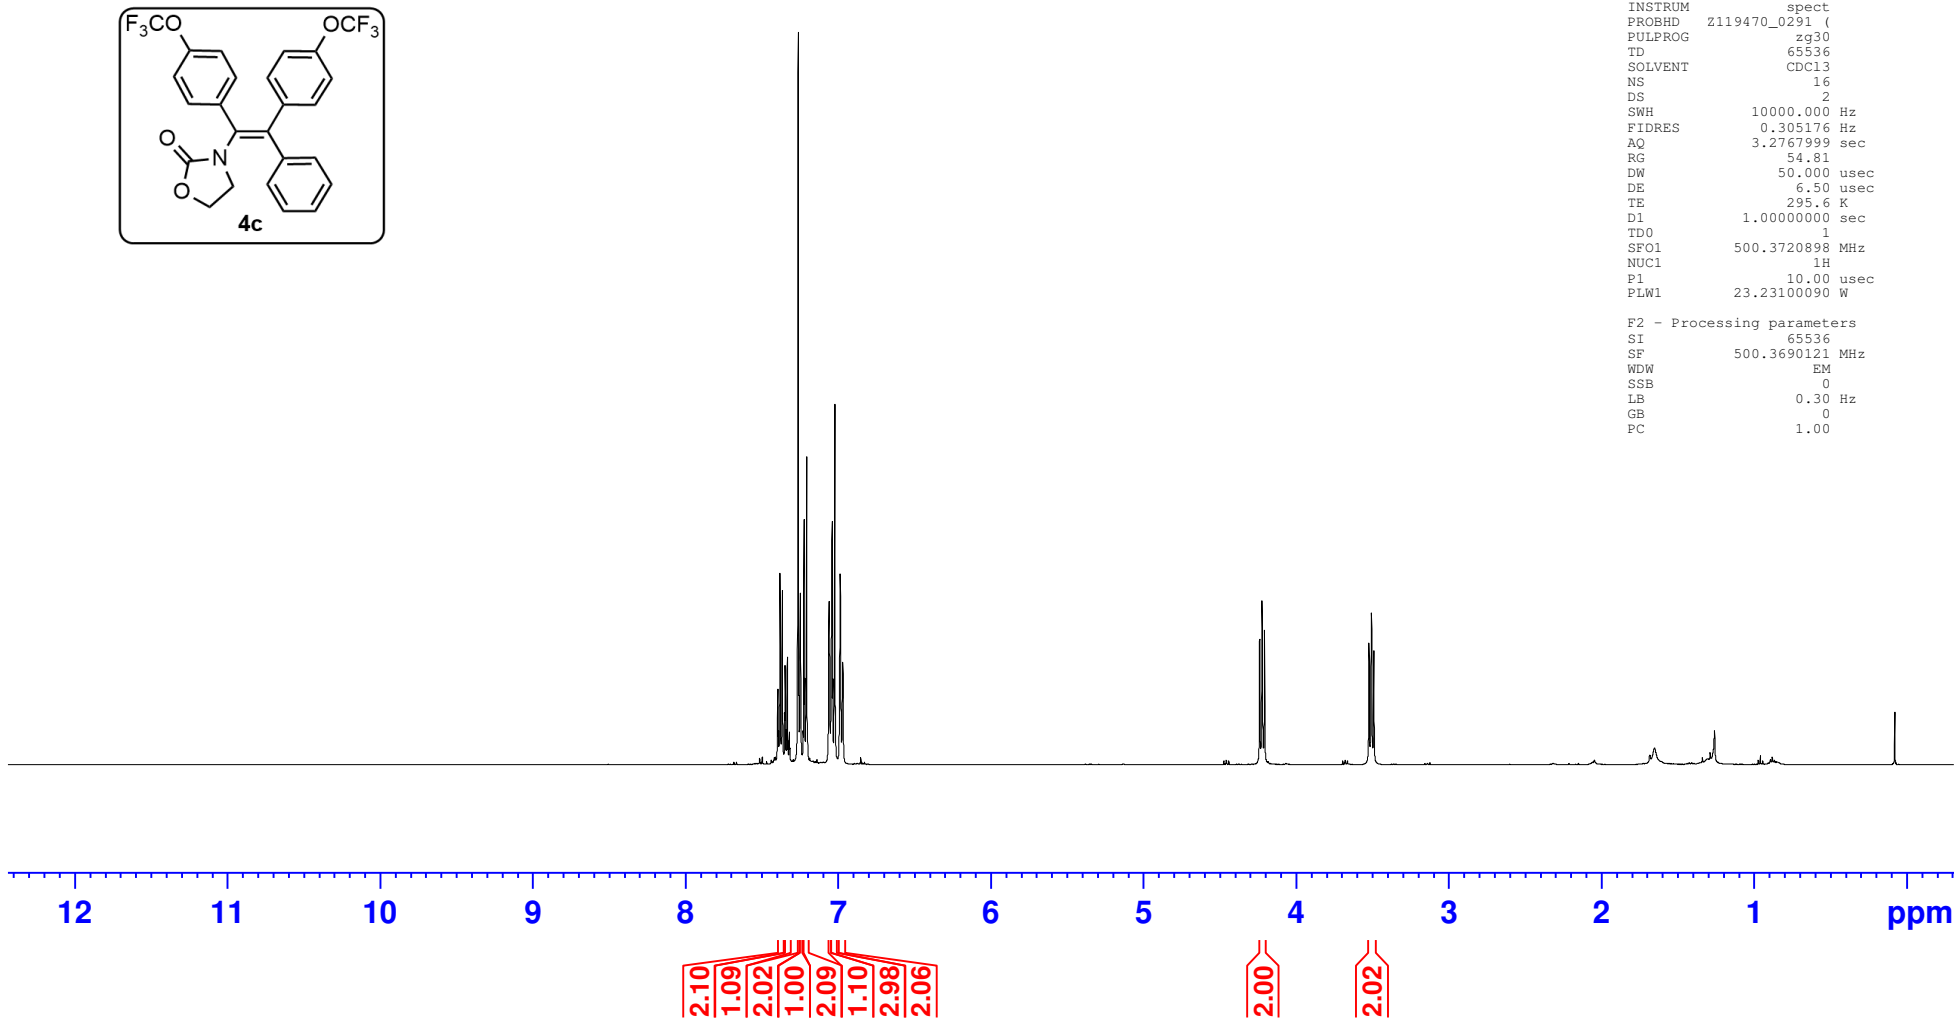

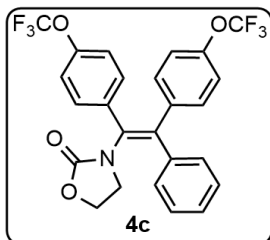

155.65  
 148.82  
 148.47  
 140.78  
 139.95  
 138.83  
 134.56  
 132.34  
 131.71  
 131.08  
 128.90  
 128.73  
 128.31  
 123.40  
 121.36  
 120.65  
 120.37  
 119.31  
 117.26

77.25  
 77.20  
 77.00  
 76.74

62.22

45.93

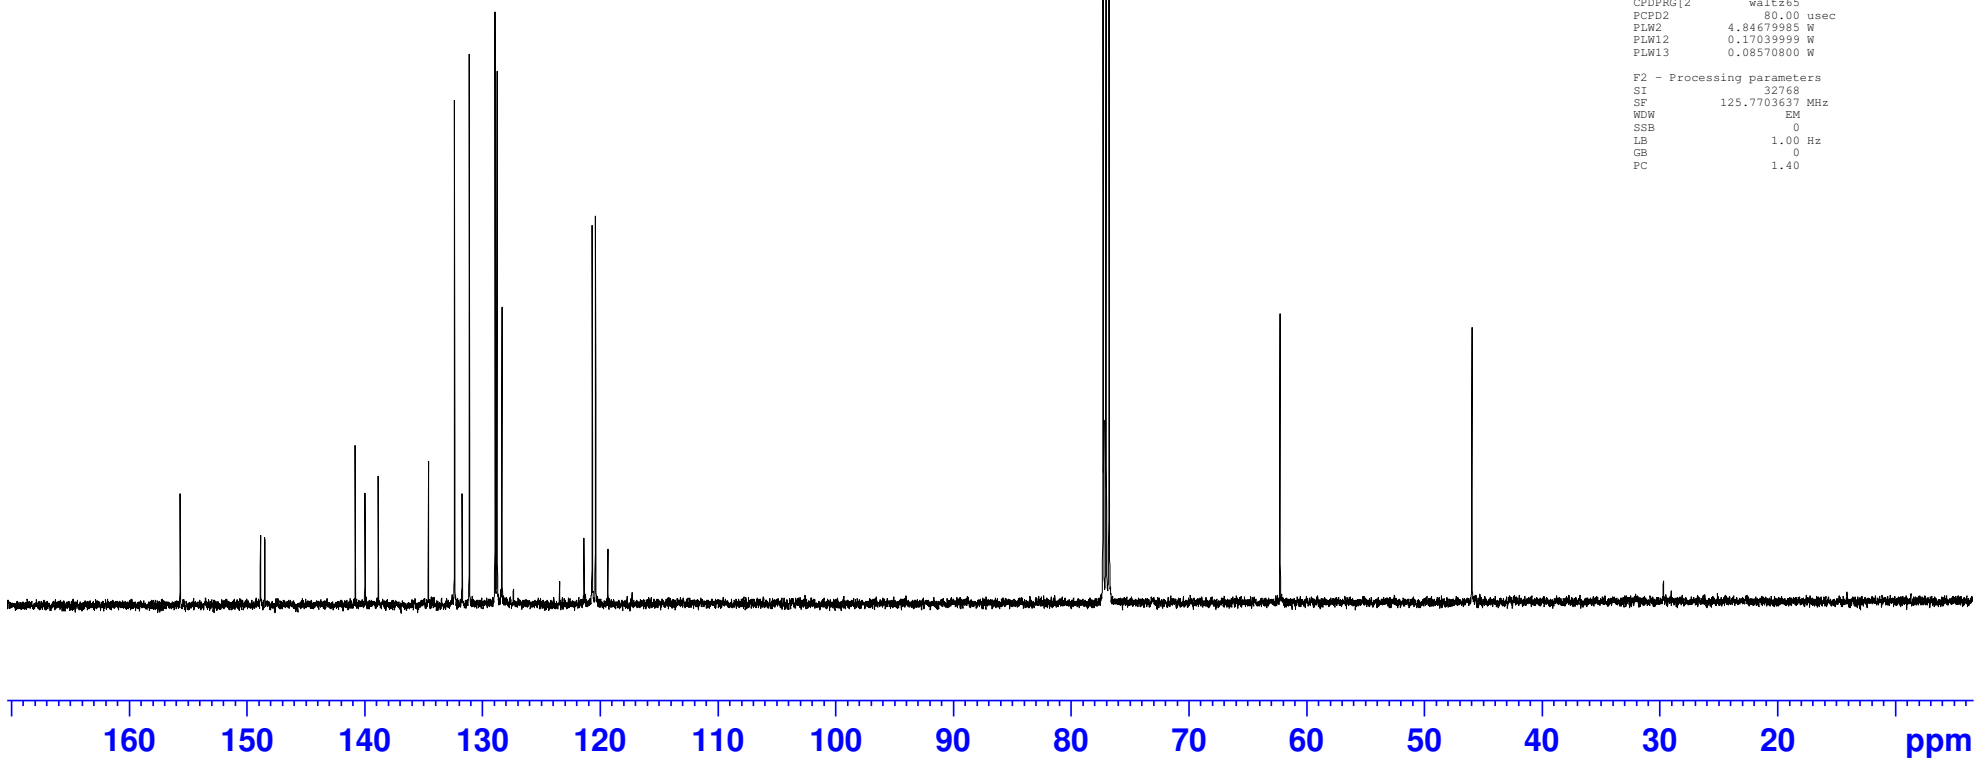

Current Data Parameters  
 NAME aradhanasahoo updated 500  
 EXPNO 54  
 PROCNO 1

F2 - Acquisition Parameters

Date\_ 20211103  
 Time 14.28 h  
 INSTRUM spect  
 PROBHD Z109128\_0042 ( )  
 PULPROG zgpg30  
 TD 65536  
 SOLVENT cdcl3  
 NS 710  
 DS 4  
 SWH 29761.904 Hz  
 FIDRES 0.908261 Hz  
 AQ 1.1010048 sec  
 RG 203  
 DW 16.800 usec  
 DE 6.50 usec  
 TE 298.5 K  
 D1 2.0000000 sec  
 D11 0.0300000 sec  
 TDO 1  
 SFO1 125.7829381 MHz  
 NUC1 13C  
 P0 3.33 usec  
 P1 10.00 usec  
 PLW1 64.00399780 W  
 SFO2 500.1820007 MHz  
 NUC2 1H  
 CPDPRG[2] waltz65  
 PCPD2 80.00 usec  
 PLW2 4.84679985 W  
 PLW12 0.17039999 W  
 PLW13 0.08570800 W

F2 - Processing parameters  
 SI 32768  
 SF 125.7703637 MHz  
 WDW EM  
 SSB 0  
 LB 1.00 Hz  
 GB 0  
 PC 1.40

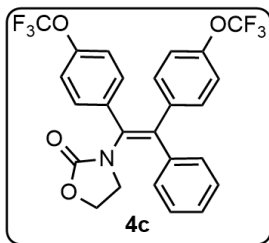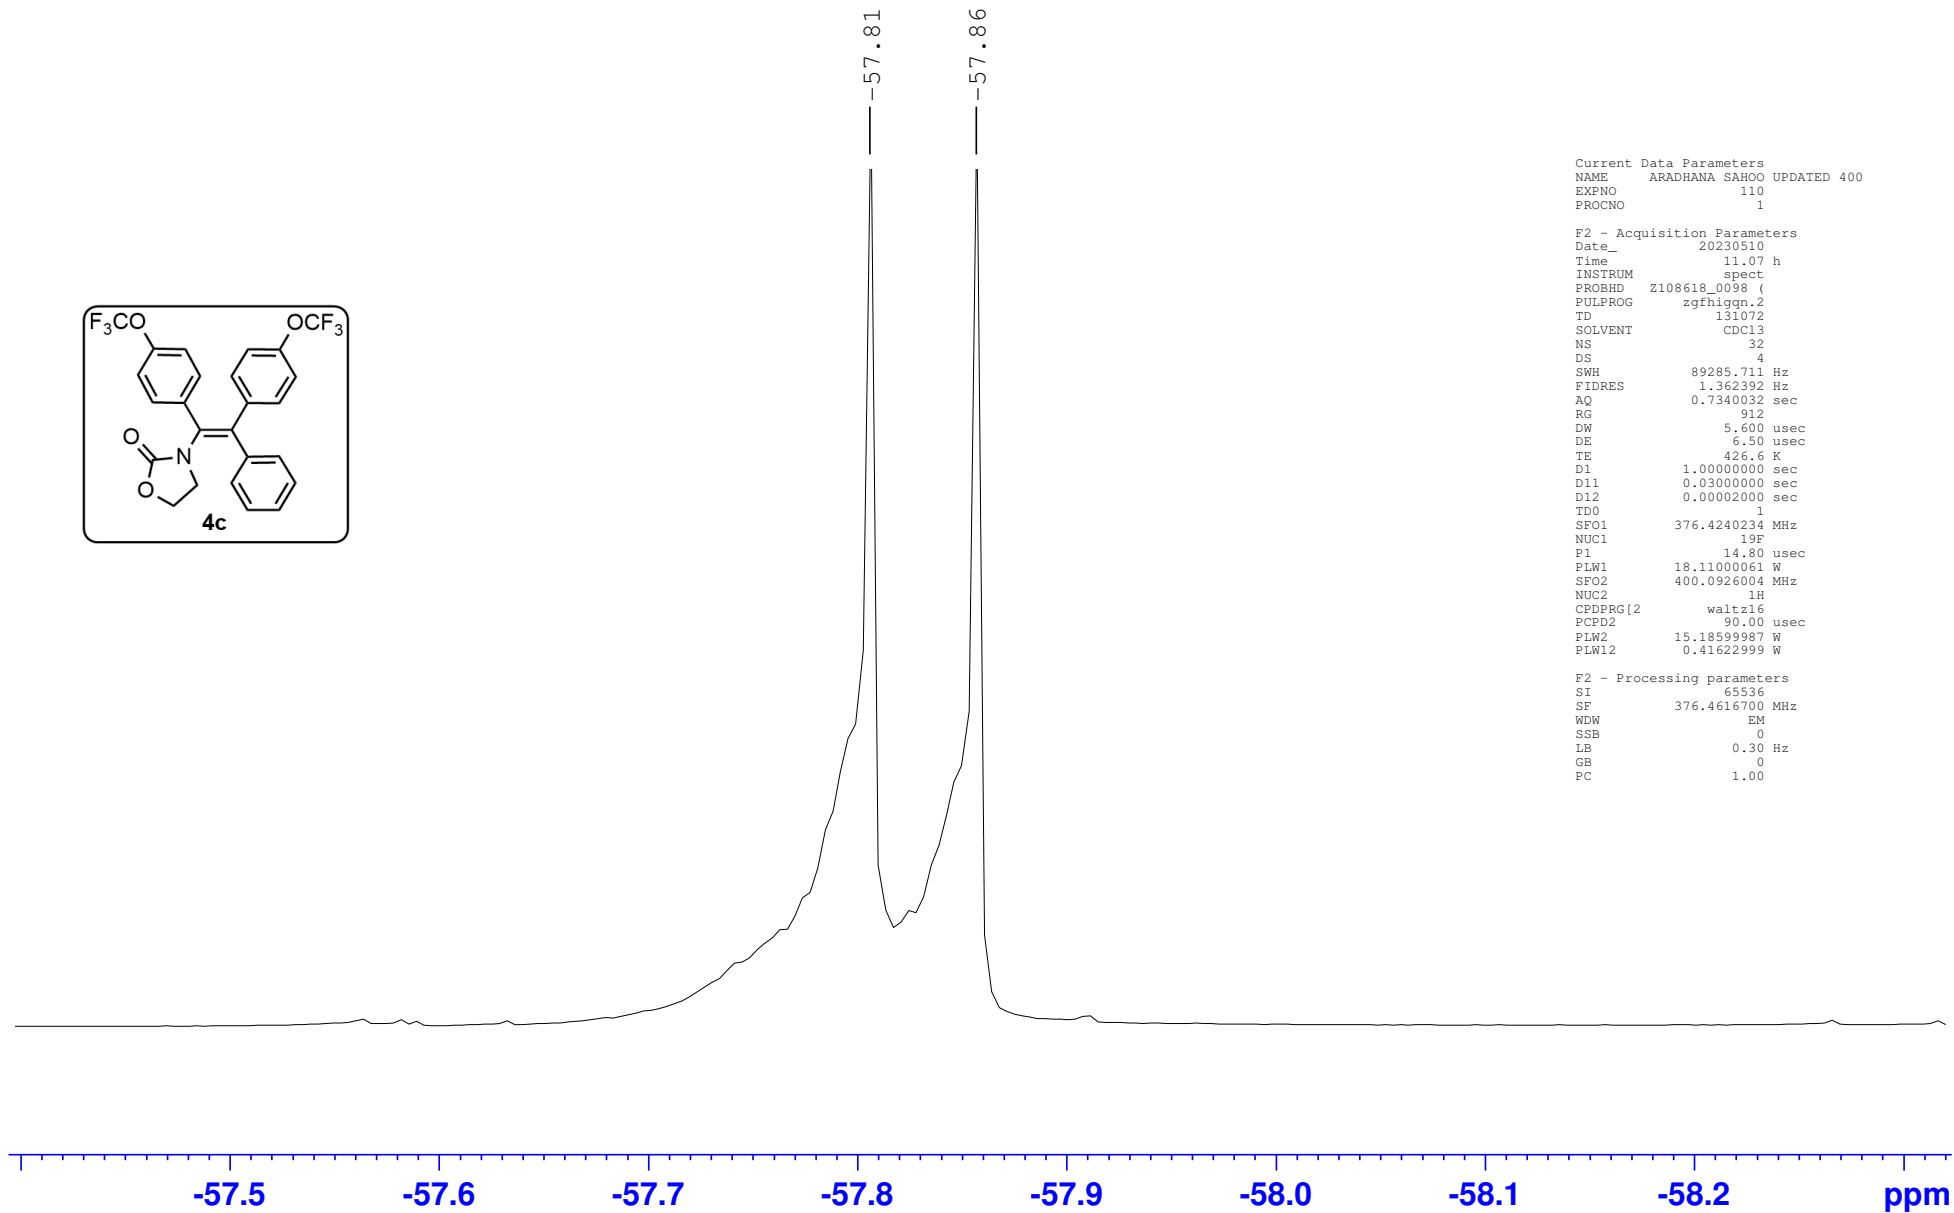

7.362  
7.360  
7.348  
7.345  
7.343  
7.336  
7.331  
7.330  
7.300  
7.298  
7.288  
7.284  
7.276  
7.273  
7.260  
6.828  
6.823  
6.811  
6.807  
6.732  
6.716  
6.677  
6.673  
6.650  
6.634  
6.584  
6.580  
6.568  
6.564  
6.558  
6.554  
4.213  
4.197  
4.181  
3.838  
3.806  
3.564  
3.548  
3.536  
3.516

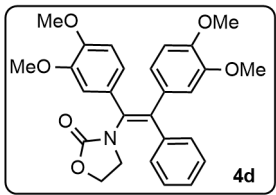

```

Current Data Parameters
NAME      ARADHANA SAROO ASCEND 500
EXPNO    46
PROCNO    1

F2 - Acquisition Parameters
Date_     20211123
Time      12.05 h
INSTRUM   spect
PROBHD    Z125331_0034 (
PULPROG   zg30
TD         65536
SOLVENT   CDCl3
NS         16
DS         2
SWH        10000.000 Hz
FIDRES     0.305176 Hz
AQ         3.2767999 sec
RG         76.68
DW         50.000 usec
DE         6.50 usec
TE         298.7 K
D1         1.00000000 sec
TD0        1
SFO1      500.3720898 MHz
NUC1       1H
P1         8.00 usec
PLW1      12.18000031 W

F2 - Processing parameters
SI         65536
SF         500.3690119 MHz
WDW        EM
SSB        0
LB         0.30 Hz
GB         0
PC         1.00
  
```

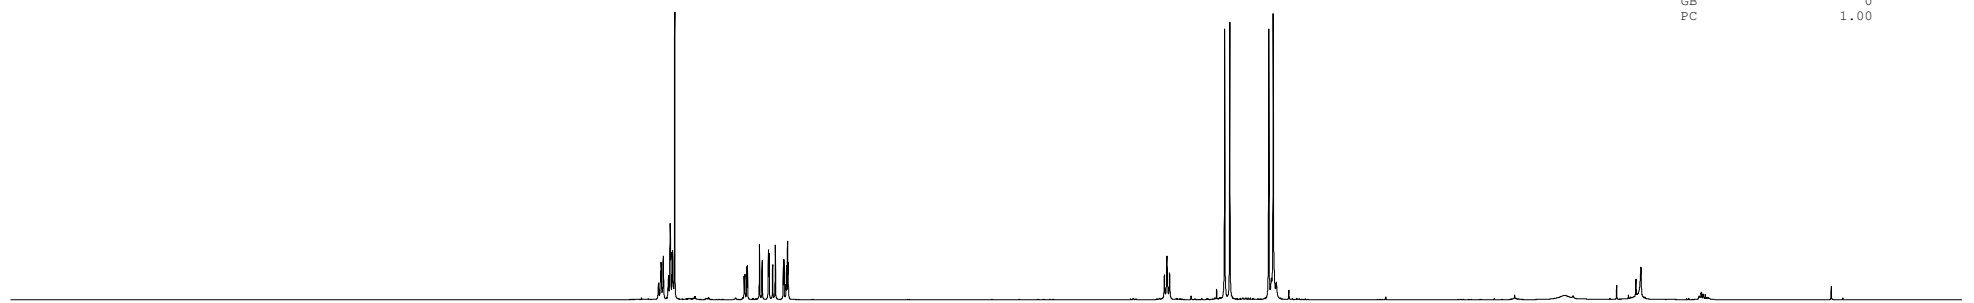

11 10 9 8 7 6 5 4 3 2 1 0 ppm

2.08 3.05 1.04 1.04 1.02 1.01 2.04 2.00 3.06 3.03 3.02 5.08

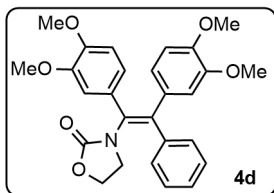

— 155.82  
 148.79  
 148.53  
 148.31  
 148.26  
 — 141.71  
 — 139.35  
 133.53  
 131.14  
 128.96  
 128.88  
 128.38  
 127.67  
 123.63  
 121.64  
 — 114.33  
 113.17  
 110.76  
 110.61

77.25  
 77.00  
 76.74

— 62.06  
 55.79  
 55.75  
 55.70  
 55.66

— 46.16

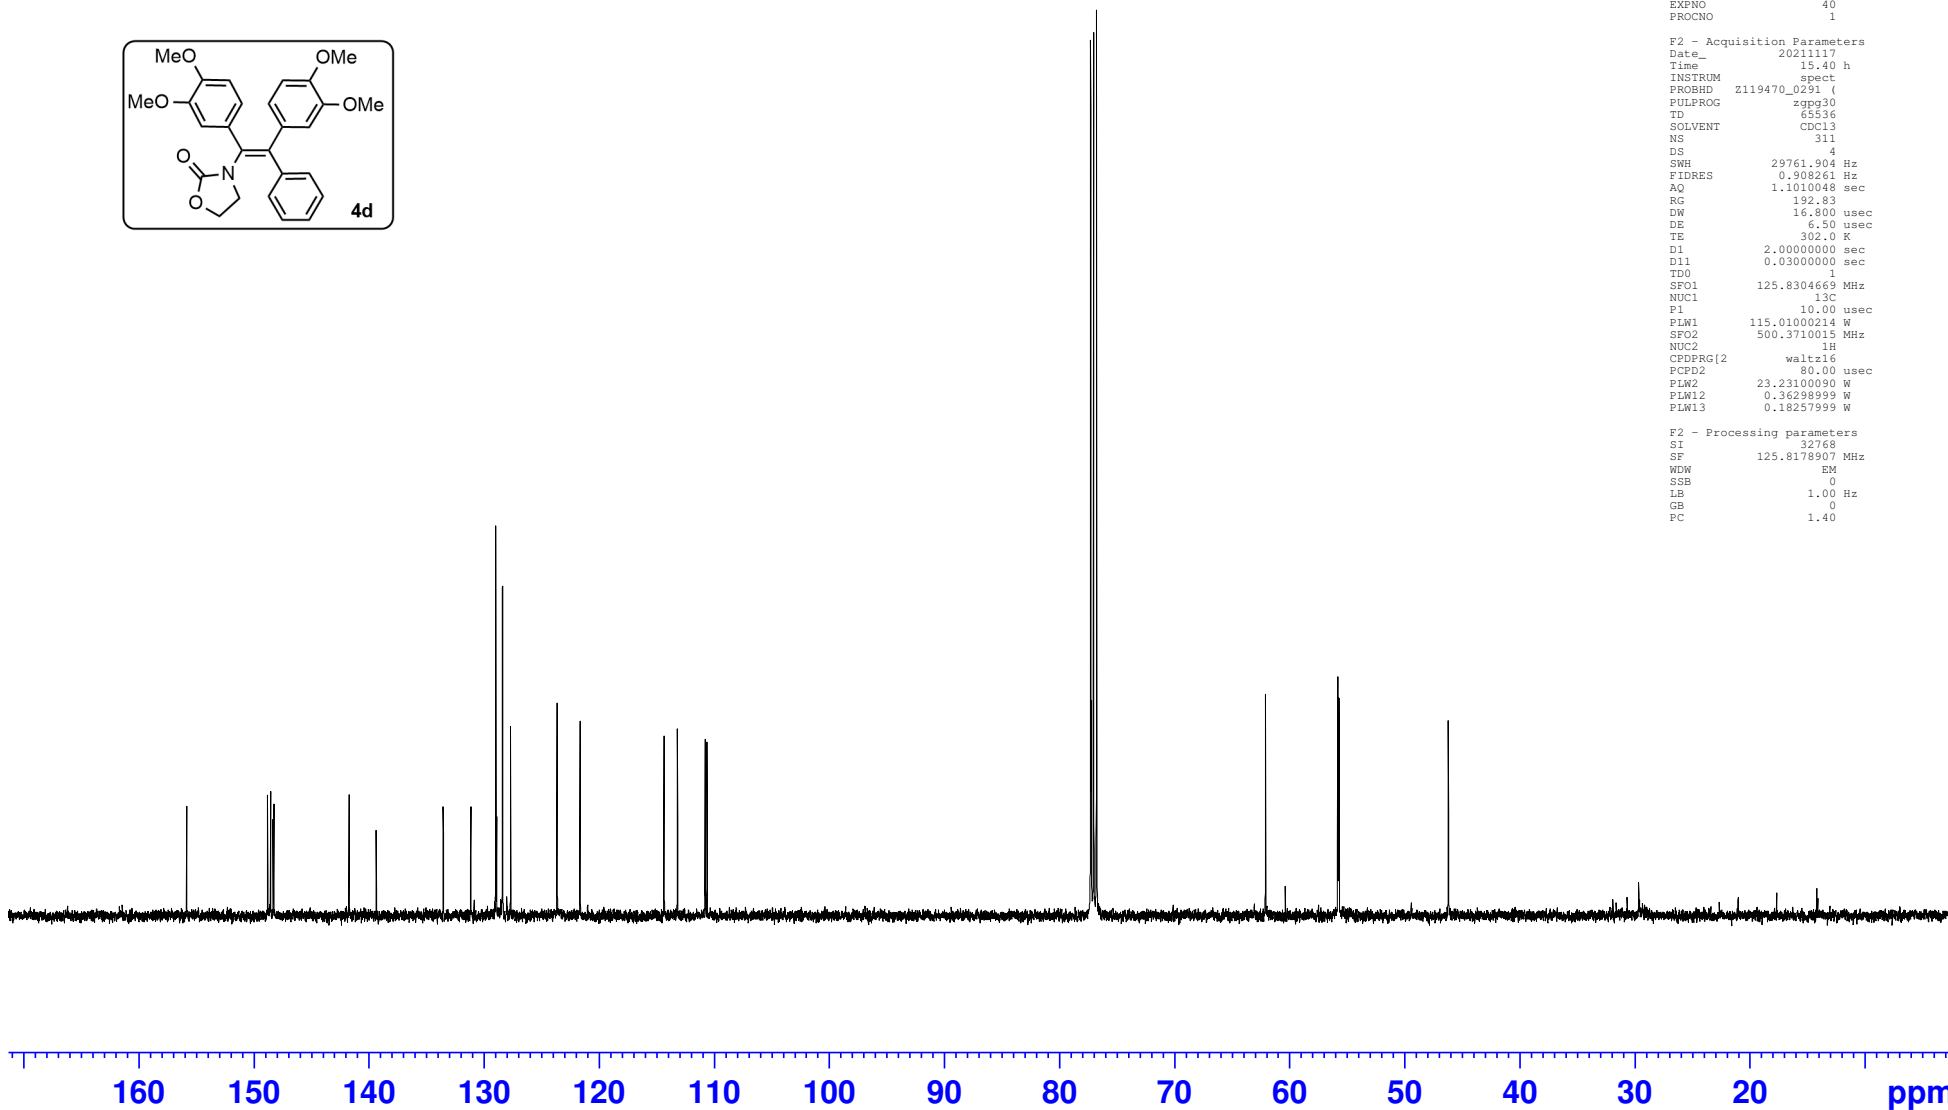

```

Current Data Parameters
NAME      ARADHANA SAHOO ASCEND 500
EXPNO    40
PROCNO   1

F2 - Acquisition Parameters
Date_    20211117
Time     15.40 h
INSTRUM  spect
PROBHD   Z119470_0291 (
PULPROG  zgpg30
TD       65536
SOLVENT  CDCl3
NS       311
DS       4
SWH      29761.904 Hz
FIDRES   0.908261 Hz
AQ       1.1010048 sec
RG       192.83
DW       16.800 usec
DE       6.50 usec
TE       302.0 K
D1       2.00000000 sec
D11      0.03000000 sec
TD0      1
SF01     125.8304669 MHz
NUC1     13C
P1       10.00 usec
PLW1     115.01000214 W
SF02     500.3710015 MHz
NUC2     1H
PCPD2    waltz16
PCPD2    80.00 usec
PLW2     23.23100090 W
PLW12    0.36298999 W
PLW13    0.18257999 W

F2 - Processing parameters
SI       32768
SF       125.8178907 MHz
WDW      EM
SSB      0
LB       1.00 Hz
GB       0
PC       1.40
  
```

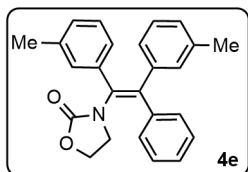

7.365  
7.362  
7.359  
7.352  
7.349  
7.346  
7.336  
7.334  
7.332  
7.308  
7.305  
7.302  
7.290  
7.284  
7.281  
7.276  
7.270  
7.260  
7.063  
7.048  
7.032  
7.013  
6.991  
6.975  
6.959  
6.949  
6.934  
6.833  
6.816  
4.212  
4.196  
4.180  
3.534  
3.518  
3.502  
2.214  
2.152

Current Data Parameters  
NAME ARADHANA SAHOO ASCEND 500  
EXPNO 26  
PROCNO 1

F2 - Acquisition Parameters  
Date\_ 20211028  
Time 16.03 h  
INSTRUM spect  
PROBHD z119470\_0291 (zq30)  
PULPROG zg30  
TD 65536  
SOLVENT CDCl3  
NS 16  
DS 2  
SWH 10000.000 Hz  
FIDRES 0.305176 Hz  
AQ 3.2767999 sec  
RG 76.68  
DW 50.000 usec  
DE 6.50 usec  
TE 297.4 K  
D1 1.00000000 sec  
TD0 1  
SFO1 500.3720898 MHz  
NUC1 1H  
P1 10.00 usec  
PLW1 23.23100090 W

F2 - Processing parameters  
SI 65536  
SF 500.3690121 MHz  
WDW EM  
SSB 0  
LB 0.30 Hz  
GB 0  
PC 1.00

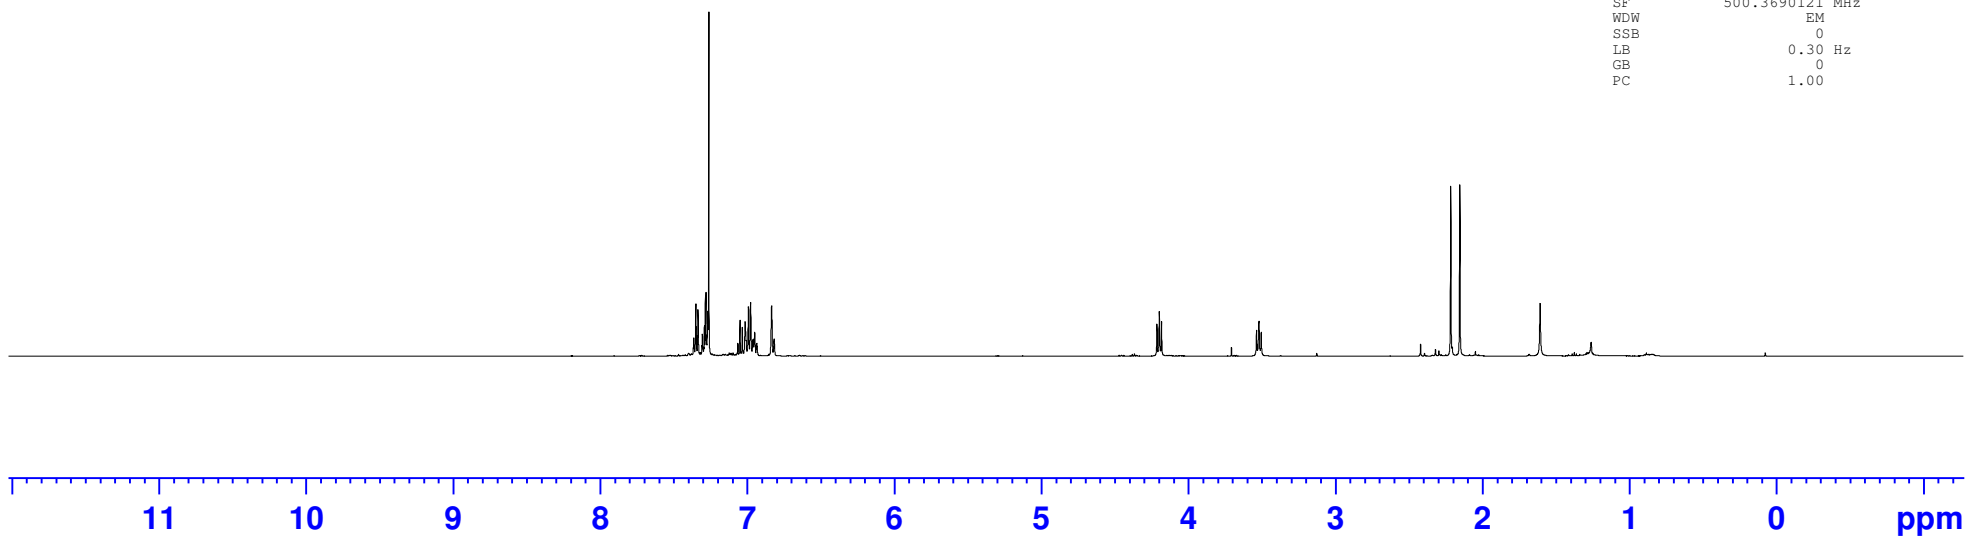

2.02  
0.99  
2.17  
1.06  
5.08  
2.03

2.00

2.02

3.01  
3.03

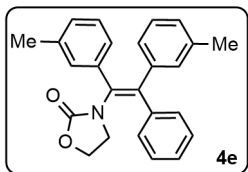

155.85  
141.81  
140.81  
140.53  
137.66  
137.31  
136.04  
131.97  
131.49  
129.85  
128.94  
128.77  
128.38  
128.08  
127.94  
127.63  
126.89

77.31  
77.00  
76.68

62.07

46.12

21.34  
21.21

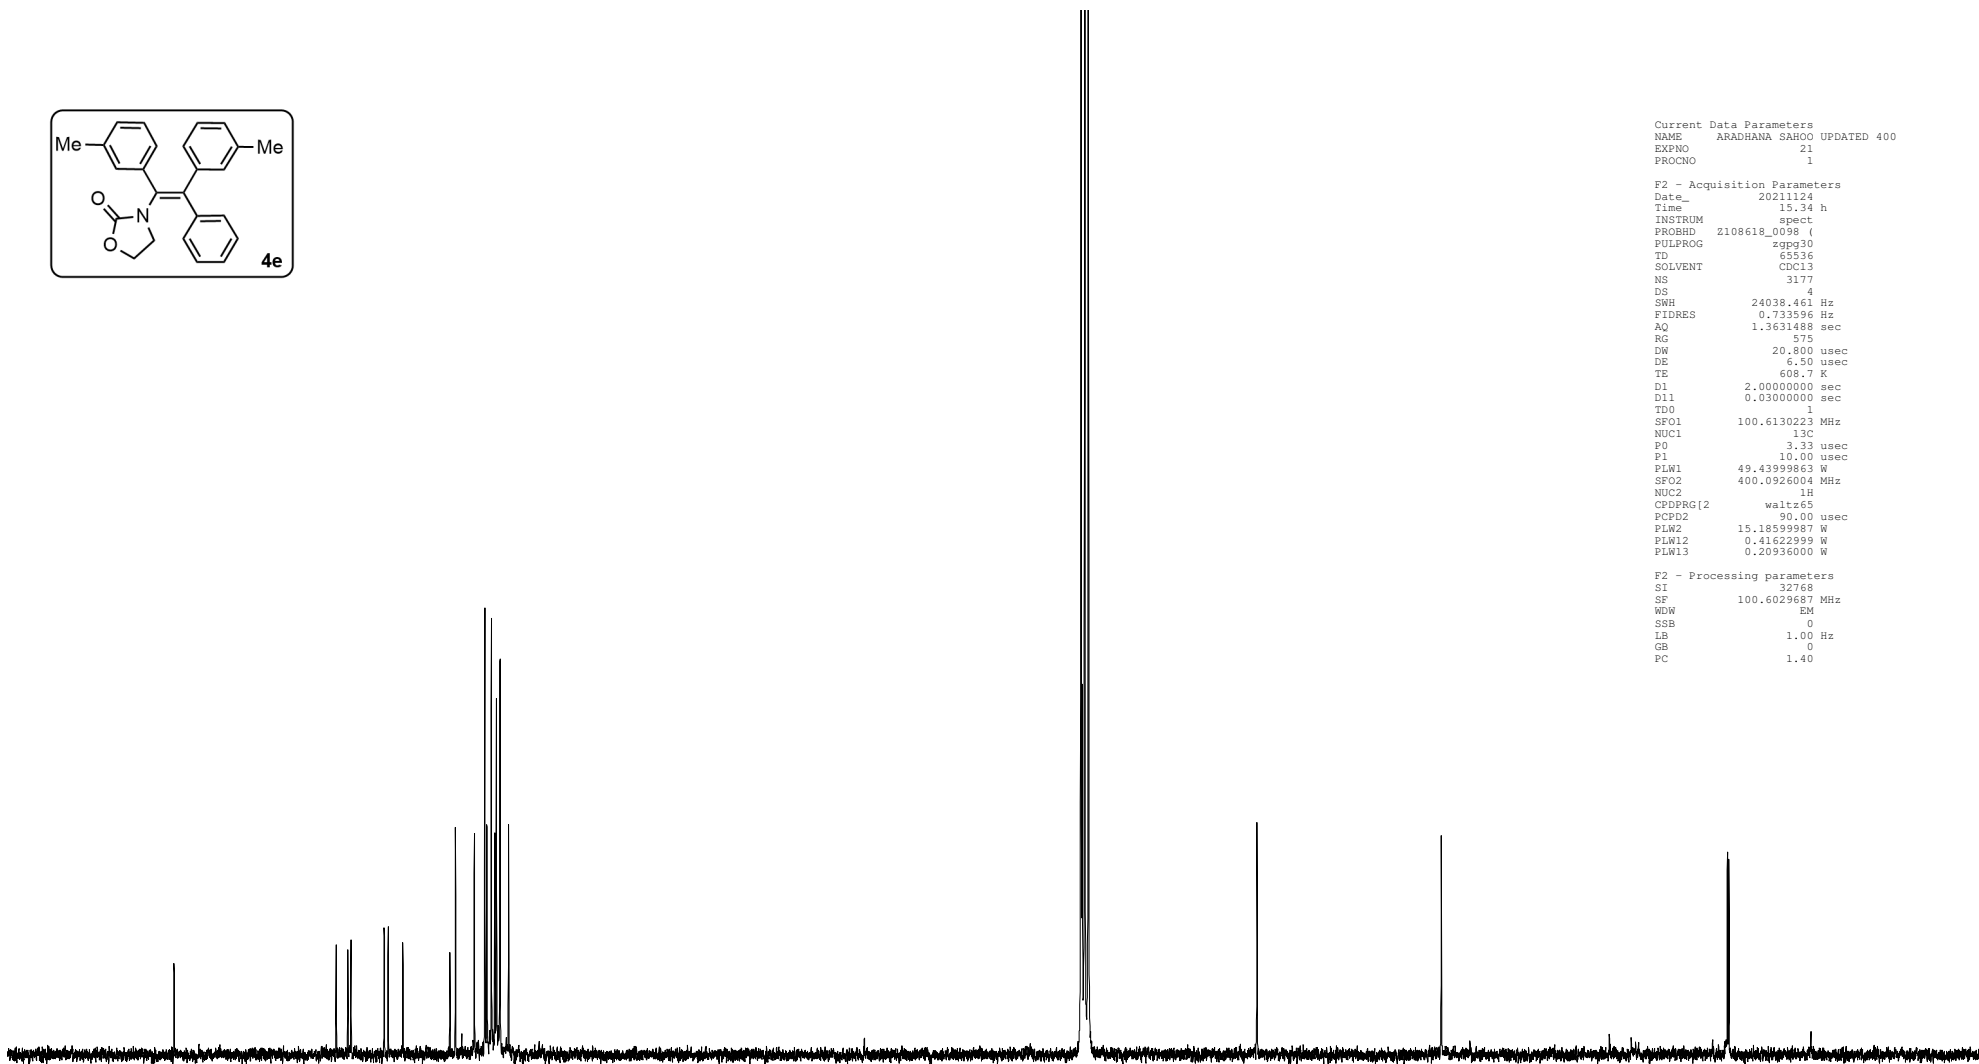

```

Current Data Parameters
NAME      ARADHANA SAHOO UPDATED 400
EXPNO    21
PROCNO    1

F2 - Acquisition Parameters
Date_    20211124
Time     15.34 h
INSTRUM  spect
PROBHD   Z108618_0098 (
PULPROG  zgpg30
TD       65536
SOLVENT  CDCl3
NS       3177
DS       4
SWH      24038.461 Hz
FIDRES   0.733596 Hz
AQ       1.3631488 sec
RG       575
DM       20.800 usec
DE       6.50 usec
TE       608.7 K
D1       2.0000000 sec
D11      0.03000000 sec
TDO      0
SFO1     100.6130223 MHz
NUC1     13C
PO       3.33 usec
PI       10.00 usec
PLW1     49.43999863 W
SFO2     400.0926004 MHz
NUC2     1H
CPDPRG2  waltz65
PCPD2    90.00 usec
PLW2     15.18599987 W
PLW12    0.41622999 W
PLW13    0.20936000 W

F2 - Processing parameters
SI       32768
SF       100.6029687 MHz
WDW      EM
SSB      0
LB       1.00 Hz
GB       0
PC       1.40
  
```

160 150 140 130 120 110 100 90 80 70 60 50 40 30 20 10 ppm

7.365  
7.362  
7.359  
7.352  
7.349  
7.346  
7.336  
7.334  
7.332  
7.308  
7.305  
7.302  
7.290  
7.284  
7.281  
7.276  
7.270  
7.260  
7.063  
7.048  
7.032  
7.013  
6.991  
6.975  
6.959  
6.949  
6.934  
6.833  
6.816  
4.212  
4.196  
4.180  
3.534  
3.518  
3.502  
2.214  
2.152

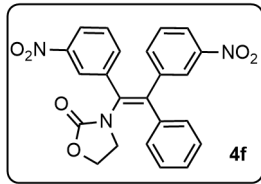

Current Data Parameters  
NAME ARADHANA SAHOO ASCEND 500  
EXPNO 26  
PROCNO 1

F2 - Acquisition Parameters  
Date\_ 20211028  
Time 16.03 h  
INSTRUM spect  
PROBHD z119470\_0291 (   
PULPROG zg30  
TD 65536  
SOLVENT CDCl3  
NS 16  
DS 2  
SWH 10000.000 Hz  
FIDRES 0.305176 Hz  
AQ 3.2767999 sec  
RG 76.68  
DW 50.000 usec  
DE 6.50 usec  
TE 297.4 K  
D1 1.00000000 sec  
TD0 1  
SFO1 500.3720898 MHz  
NUC1 1H  
P1 10.00 usec  
PLW1 23.23100090 W

F2 - Processing parameters  
SI 65536  
SF 500.3690121 MHz  
WDW EM  
SSB 0  
LB 0.30 Hz  
GB 0  
PC 1.00

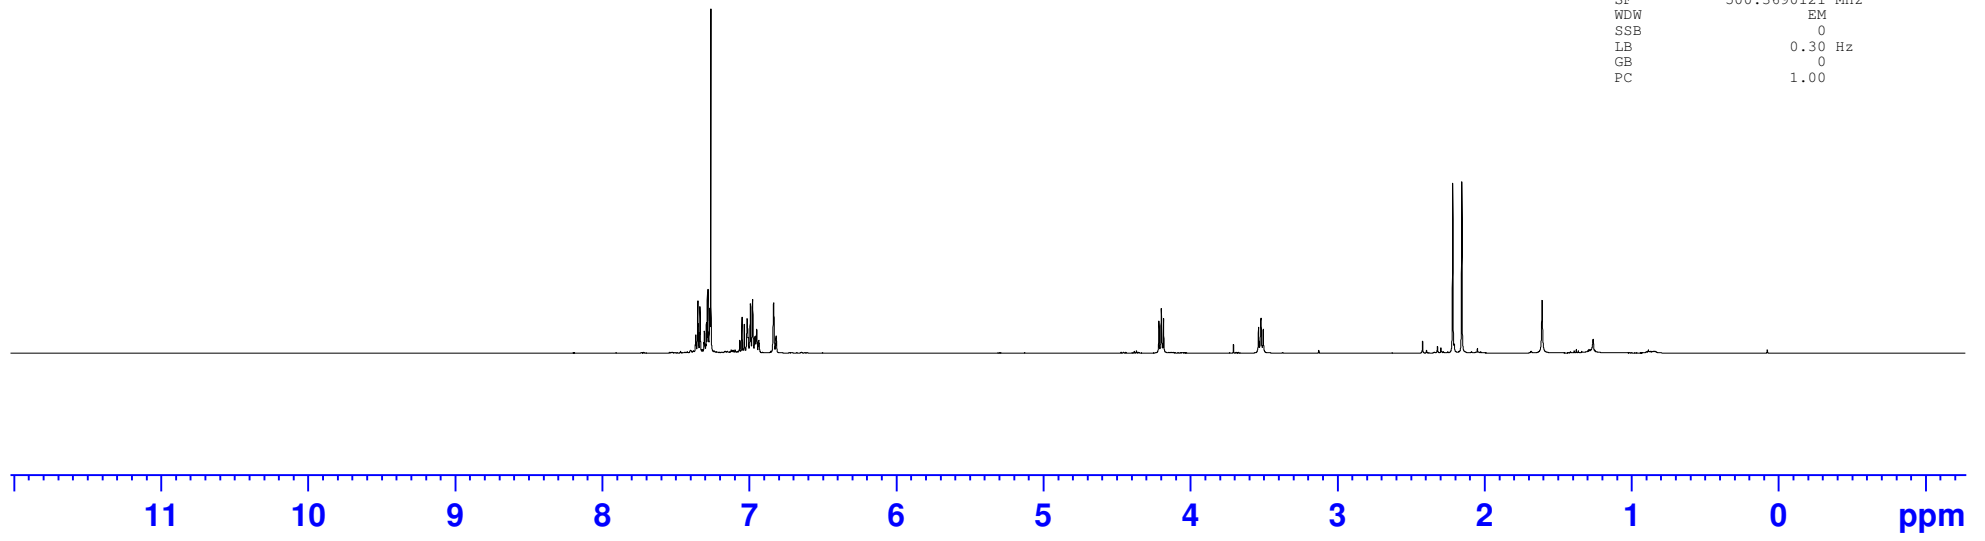

2.02  
0.99  
2.17  
1.06  
5.08  
2.03  
2.00  
2.02  
3.01  
3.03



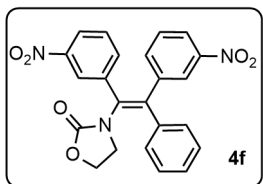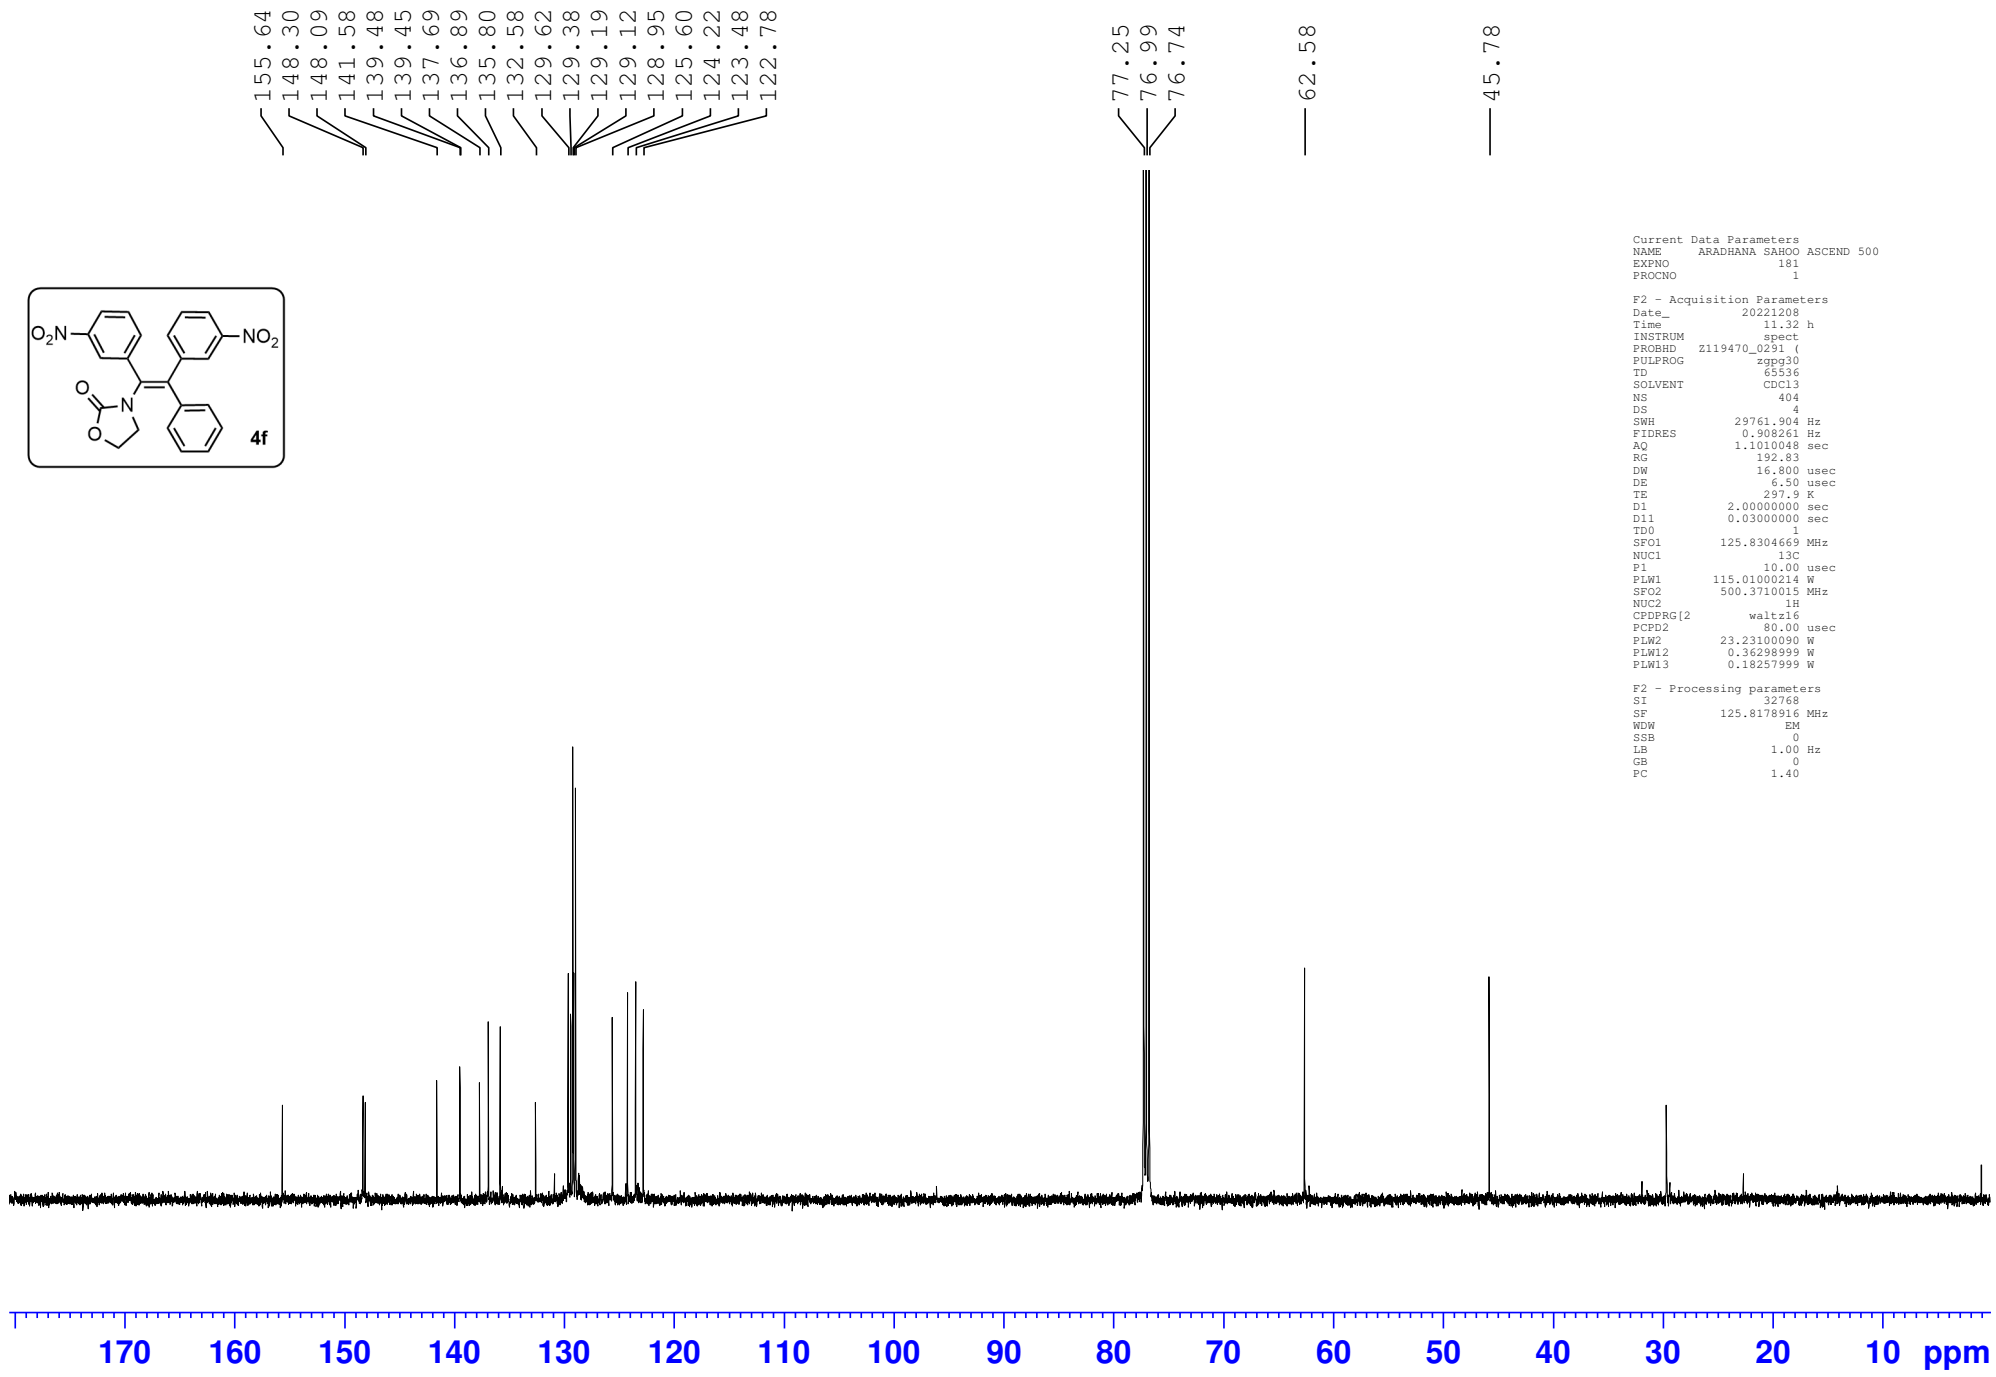

```

Current Data Parameters
NAME ARADHANA SAHOO ASCEND 500
EXPNO 181
PROCNO 1

F2 - Acquisition Parameters
Date_ 20221208
Time 11.32 h
INSTRUM spect
PROBHD z119470_0291 (
PULPROG zgpg30
TD 65536
SOLVENT CDCl3
NS 404
DS 4
SWH 29761.904 Hz
FIDRES 0.908261 Hz
AQ 1.1010048 sec
RG 192.83
DW 16.800 usec
DE 6.50 usec
TE 297.9 K
D1 2.00000000 sec
D11 0.03000000 sec
TDO 1
SFO1 125.8304669 MHz
NUC1 13C
P1 10.00 usec
PLW1 115.01000214 W
SFO2 500.3710015 MHz
NUC2 1H
CPDPRG2 waltz16
PCPD2 80.00 usec
PLW2 23.23100090 W
PLW12 0.36298999 W
PLW13 0.18257999 W

F2 - Processing parameters
SI 32768
SF 125.8178916 MHz
WDW EM
SSB 0
LE 1.00 Hz
GB 0
PC 1.40

```

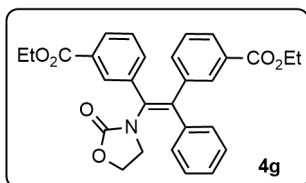

7.883  
7.880  
7.877  
7.862  
7.846  
7.823  
7.810  
7.687  
7.685  
7.683  
7.374  
7.371  
7.362  
7.359  
7.358  
7.348  
7.347  
7.345  
7.340  
7.337  
7.335  
7.333  
7.332  
7.329  
7.325  
7.279  
7.276  
7.266  
7.235  
7.235  
7.220  
7.219  
7.204  
7.199  
7.195  
7.191  
7.181  
7.180  
4.322  
4.308  
4.294  
4.279  
4.264  
4.257  
4.250  
4.242  
4.236  
4.226  
3.540  
3.524  
3.509  
1.337  
1.323  
1.308  
1.300  
1.286  
1.272

Current Data Parameters  
 NAME ARADHANA SAHOO ASCEND 500  
 EXPNO 29  
 PROCNO 1  
 F2 - Acquisition Parameters  
 Date\_ 20211102  
 Time 15.36 h  
 INSTRUM spect  
 PROBHD Z119470\_0291 ( 2930  
 PULPROG 65536  
 TD 65536  
 SOLVENT CDCl3  
 NS 16  
 DS 2  
 SWH 10000.000 Hz  
 FIDRES 0.305176 Hz  
 AQ 3.2767999 sec  
 RG 62.04  
 DW 50.000 usec  
 DE 6.50 usec  
 TE 297.1 K  
 D1 1.00000000 sec  
 TDO 1  
 SFO1 500.3720898 MHz  
 NUC1 1H  
 P1 10.00 usec  
 PLW1 23.23100090 W  
 F2 - Processing parameters  
 SI 65536  
 SF 500.3690119 MHz  
 WDW EM  
 SSB 0  
 LB 0.30 Hz  
 GB 0  
 PC 1.00

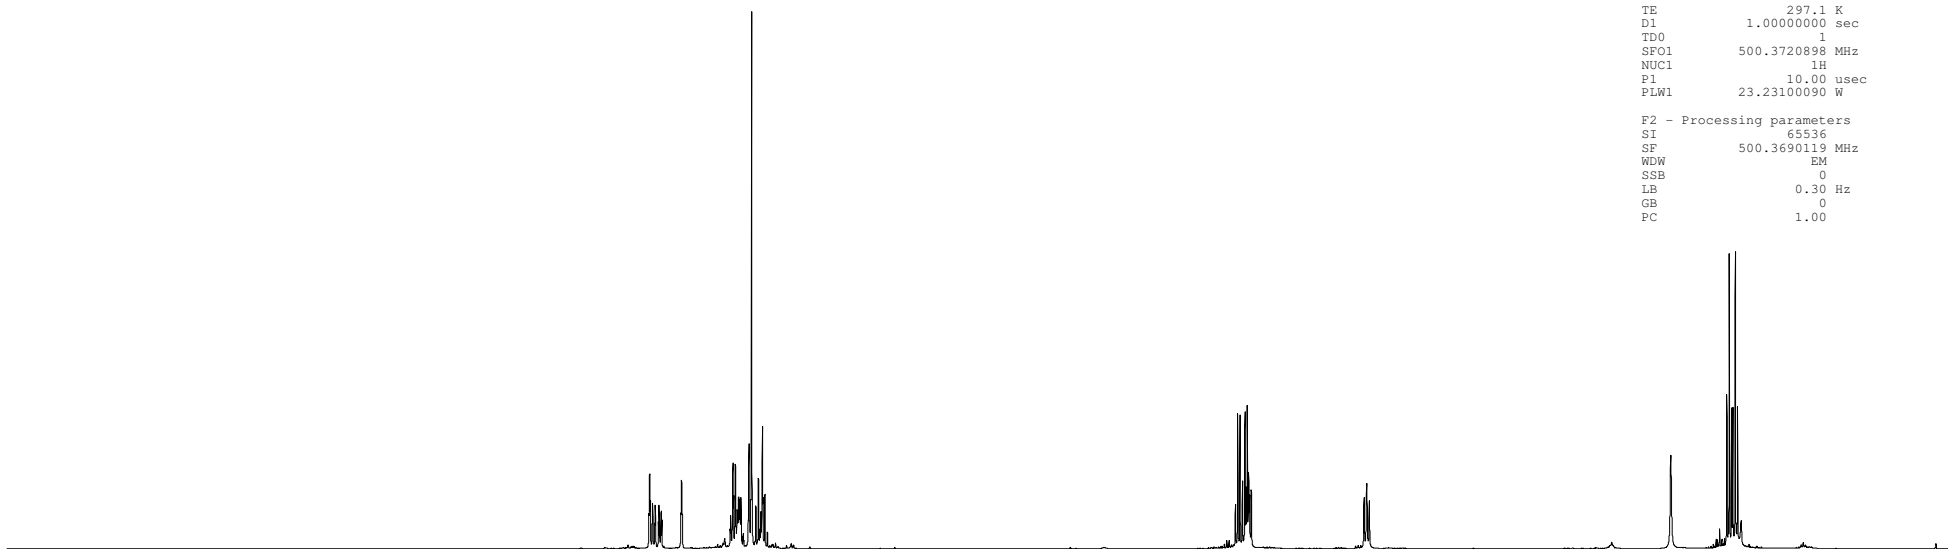

11 10 9 8 7 6 5 4 3 2 1 ppm

2.04  
0.99  
1.00  
2.08  
2.05  
1.02  
1.03  
3.03

2.24  
4.00  
2.00

3.06  
3.07

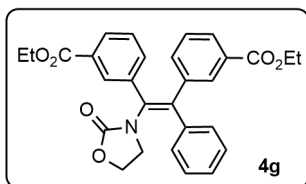

166.10  
166.01  
155.73  
140.67  
140.58  
140.15  
136.41  
135.31  
134.29  
132.36  
131.94  
130.70  
130.41  
130.33  
129.28  
128.96  
128.73  
128.53  
128.38  
128.28  
128.14

77.25  
77.20  
77.00  
76.74

62.31  
61.01  
60.92

— 45.95

14.19  
14.15

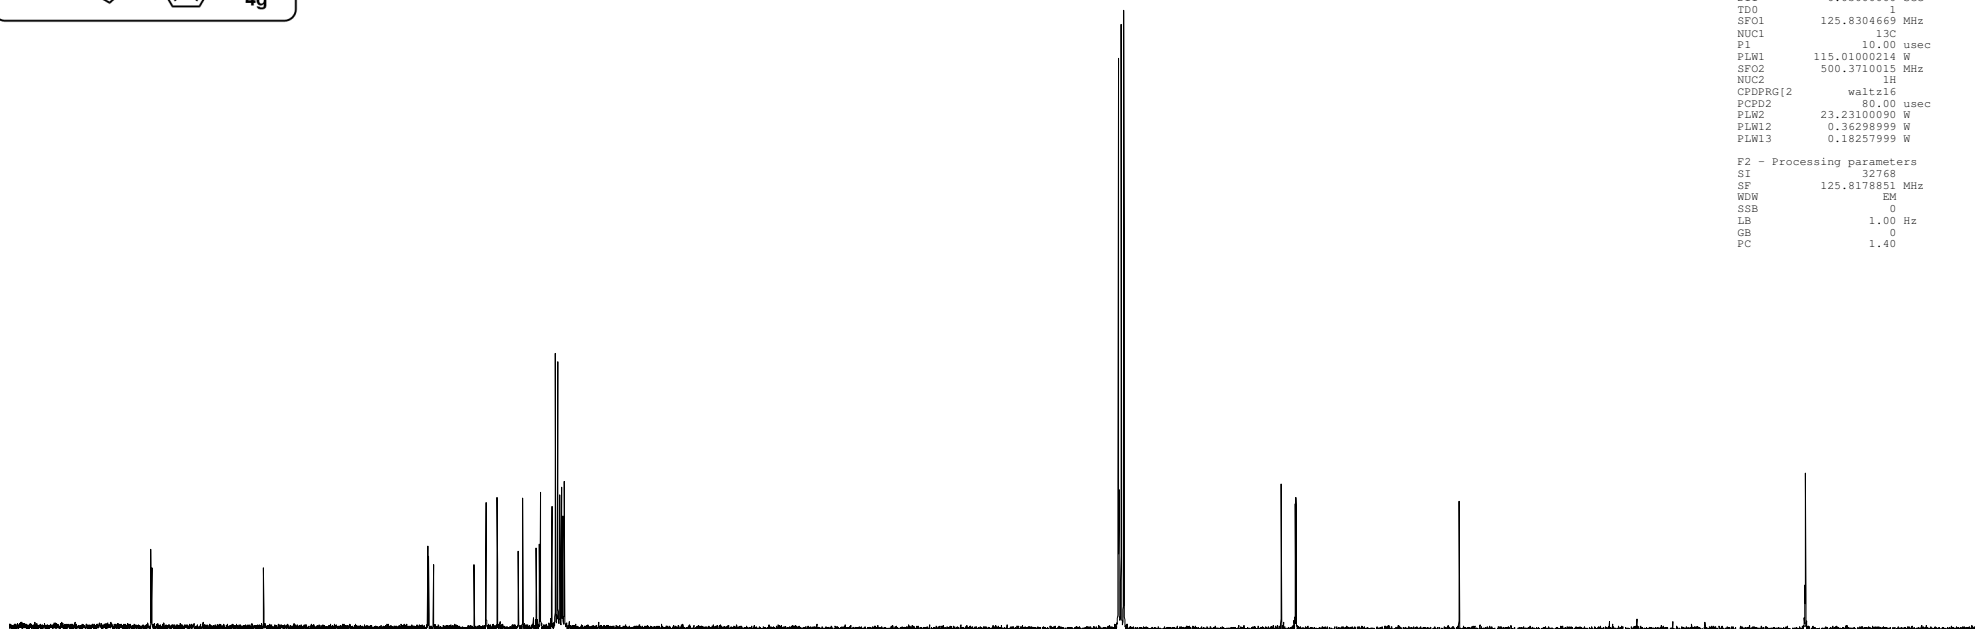

```

Current Data Parameters
NAME ARADHANA SAHO ASCEND 500
EXPNO 30
PROCNO 1

F2 - Acquisition Parameters
Date_ 20211102
Time 16.03 h
INSTRUM spect
PROBHD Z119470_0291 (
PULPROG zgpg30
TD 65536
SOLVENT cdcl3
NS 470
DS 4
SWH 29761.904 Hz
FIDRES 0.908261 Hz
AQ 1.1010048 sec
RG 192.83
DM 16.800 usec
DE 6.50 usec
TE 297.8 K
D1 2.00000000 sec
D11 0.03000000 sec
TD0 1
SF01 125.8304669 MHz
NUC1 13C
P1 10.00 usec
PLW1 115.01000214 W
SF02 500.3710015 MHz
NUC2 1H
CPDPRG2 waltz16
PCPD2 80.00 usec
PLW2 23.23100090 W
PLW12 0.362989999 W
PLW13 0.182579999 W

F2 - Processing parameters
SI 32768
SF 125.8176851 MHz
WDW EM
SSB 0
LB 1.00 Hz
GB 0
PC 1.40

```

7.435  
7.421  
7.405  
7.376  
7.374  
7.372  
7.364  
7.359  
7.355  
7.347  
7.345  
7.342  
7.314  
7.311  
7.307  
7.298  
7.295  
7.291  
7.284  
7.270  
7.254  
7.238  
7.232  
7.228  
7.224  
7.209  
7.206  
7.192  
7.175  
7.172  
7.169  
7.160  
7.157  
7.154  
6.982  
6.979  
6.975  
6.948  
6.945  
6.942  
6.933  
6.930  
6.927  
4.239  
4.224  
4.207  
3.489  
3.473  
3.457  
3.328  
2.515  
2.511  
2.507  
2.504  
2.500

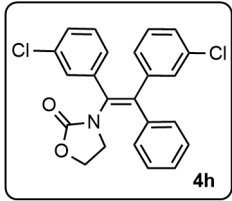

```

Current Data Parameters
NAME      aradhanasahoo updated 500
EXPNO    289
PROCNO    1

F2 - Acquisition Parameters
Date_    20230610
Time     11.22 h
INSTRUM  spect
PROBHD   Z109128_0042 (
PULPROG  zg30
TD       65536
SOLVENT  DMSO
NS       64
DS       2
SWH      10000.000 Hz
FIDRES   0.305176 Hz
AQ       3.2767999 sec
RG       406
DW       50.000 usec
DE       13.04 usec
TE       299.5 K
D1       1.00000000 sec
TD0      1
SF01     500.1830886 MHz
NUC1     1H
PO       5.00 usec
P1       15.00 usec
PLW1     4.84679985 W

F2 - Processing parameters
SI       65536
SF       500.1800000 MHz
WDW      EM
SSB      0
LB       0.30 Hz
GB       0
PC       1.00
  
```

13 12 11 10 9 8 7 6 5 4 3 2 1 0 ppm

2.03  
1.08  
1.00  
1.89  
1.05  
1.07  
2.05  
1.10  
1.01  
1.01

2.00  
2.06

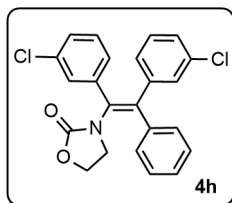

155.69  
 143.05  
 140.89  
 138.74  
 133.28  
 133.20  
 132.85  
 130.63  
 130.54  
 130.48  
 129.82  
 129.67  
 129.22  
 129.15  
 128.93  
 128.62  
 128.58  
 127.87

62.96

45.82  
 40.48  
 40.32  
 40.15  
 39.98  
 39.81  
 39.65  
 39.48

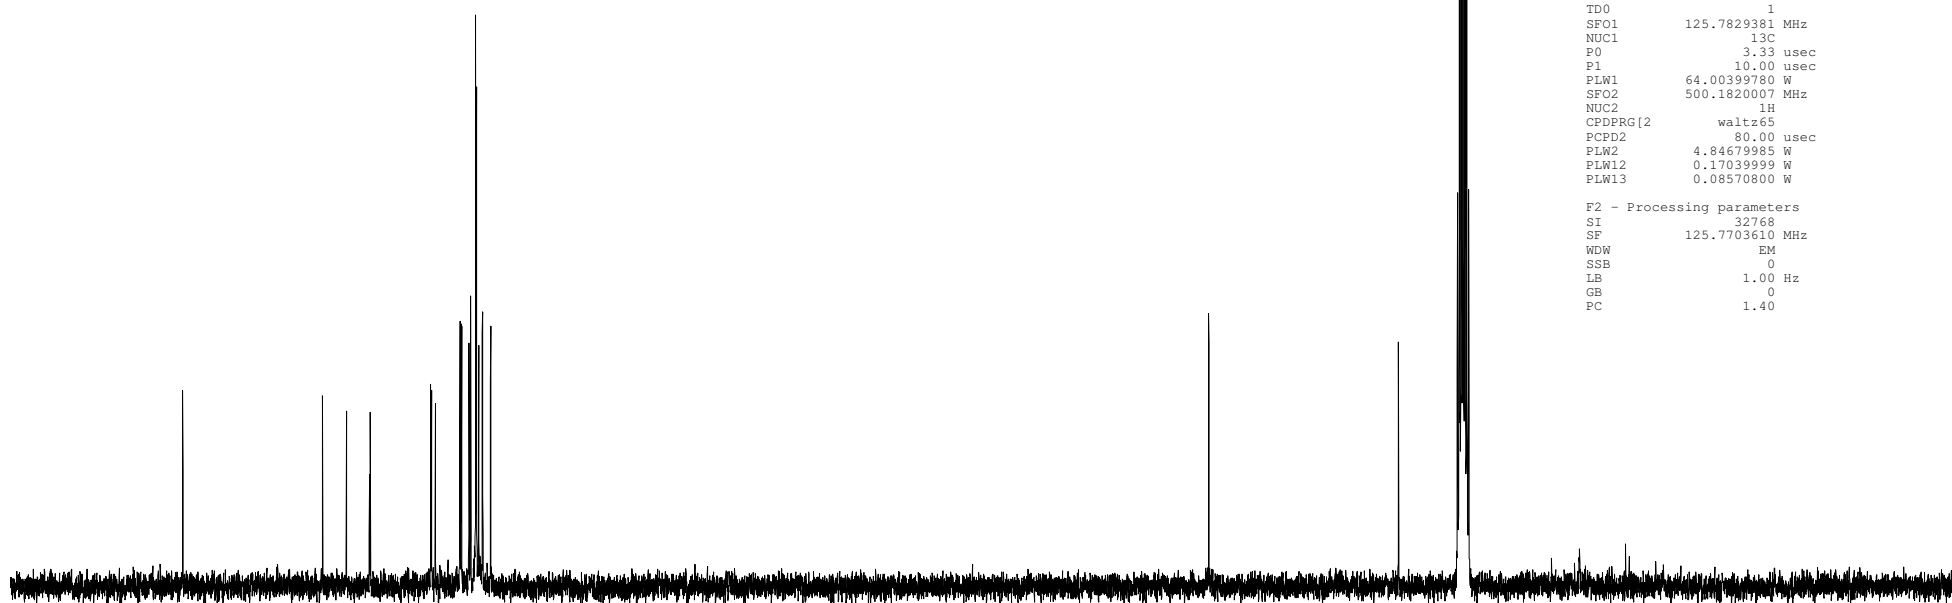

Current Data Parameters  
 NAME aradhanasahoo updated 500  
 EXPNO 268  
 PROCNO 1

F2 - Acquisition Parameters

Date\_ 20230512  
 Time 10.47 h  
 INSTRUM spect  
 PROBHD Z109128\_0042 (  
 FULPROG zgpg30  
 TD 65536  
 SOLVENT DMSO  
 NS 276  
 DS 4  
 SWH 29761.904 Hz  
 FIDRES 0.908261 Hz  
 AQ 1.1010048 sec  
 RG 203  
 DW 16.800 usec  
 DE 6.50 usec  
 TE 305.5 K  
 D1 2.0000000 sec  
 D11 0.0300000 sec  
 TD0 1  
 SFO1 125.7829381 MHz  
 NUC1 13C  
 P0 3.33 usec  
 P1 10.00 usec  
 PLM1 64.00399780 W  
 SFO2 500.1820007 MHz  
 NUC2 1H  
 CPDPRG[2] waltz65  
 PCPD2 80.00 usec  
 PLW2 4.84679985 W  
 PLW12 0.17039999 W  
 PLW13 0.08570800 W

F2 - Processing parameters

SI 32768  
 SF 125.7703610 MHz  
 WDW EM  
 SSB 0  
 LB 1.00 Hz  
 GB 0  
 PC 1.40

160 150 140 130 120 110 100 90 80 70 60 50 40 30 20 10 ppm

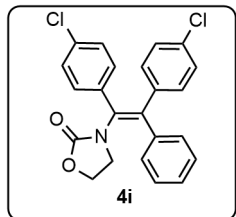

7.379  
7.376  
7.373  
7.362  
7.359  
7.347  
7.334  
7.332  
7.329  
7.317  
7.311  
7.260  
7.243  
7.240  
7.236  
7.229  
7.226  
7.224  
7.201  
7.197  
7.193  
7.184  
7.180  
7.175  
7.136  
7.132  
7.128  
7.121  
7.115  
7.107  
7.104  
7.099  
6.952  
6.947  
6.944  
6.934  
6.930  
6.925  
4.227  
4.211  
4.195  
3.501  
3.484  
3.469

Current Data Parameters  
NAME ARADHANA SAHOO ASCEND 500  
EXPNO 34  
PROCNO 1

F2 - Acquisition Parameters  
Date\_ 20211111  
Time 14.41 h  
INSTRUM spect  
PROBHD Z119470\_0291 (  
PULPROG zg30  
TD 65536  
SOLVENT CDCl3  
NS 16  
DS 2  
SWH 10000.000 Hz  
FIDRES 0.305176 Hz  
AQ 3.2767999 sec  
RG 87.13  
DW 50.000 usec  
DE 6.50 usec  
TE 295.5 K  
D1 1.00000000 sec  
TD0 1  
SFO1 500.3720898 MHz  
NUC1 1H  
P1 10.00 usec  
PLW1 23.23100090 W

F2 - Processing parameters  
SI 65536  
SF 500.3690122 MHz  
WDW EM  
SSB 0  
LB 0.30 Hz  
GB 0  
PC 1.00

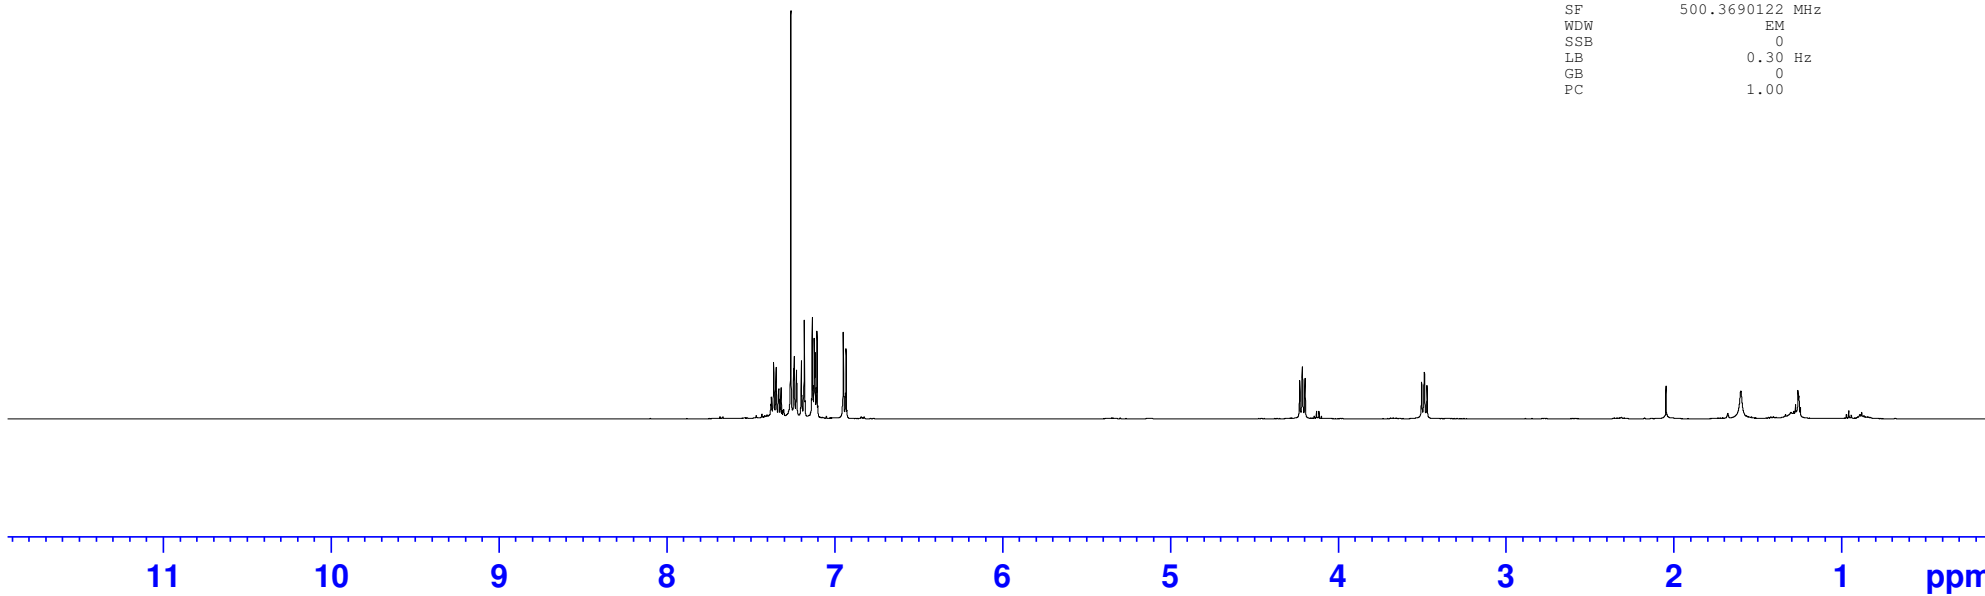

3.06  
2.06  
2.08  
4.02  
2.03

2.00

2.03

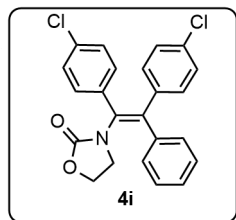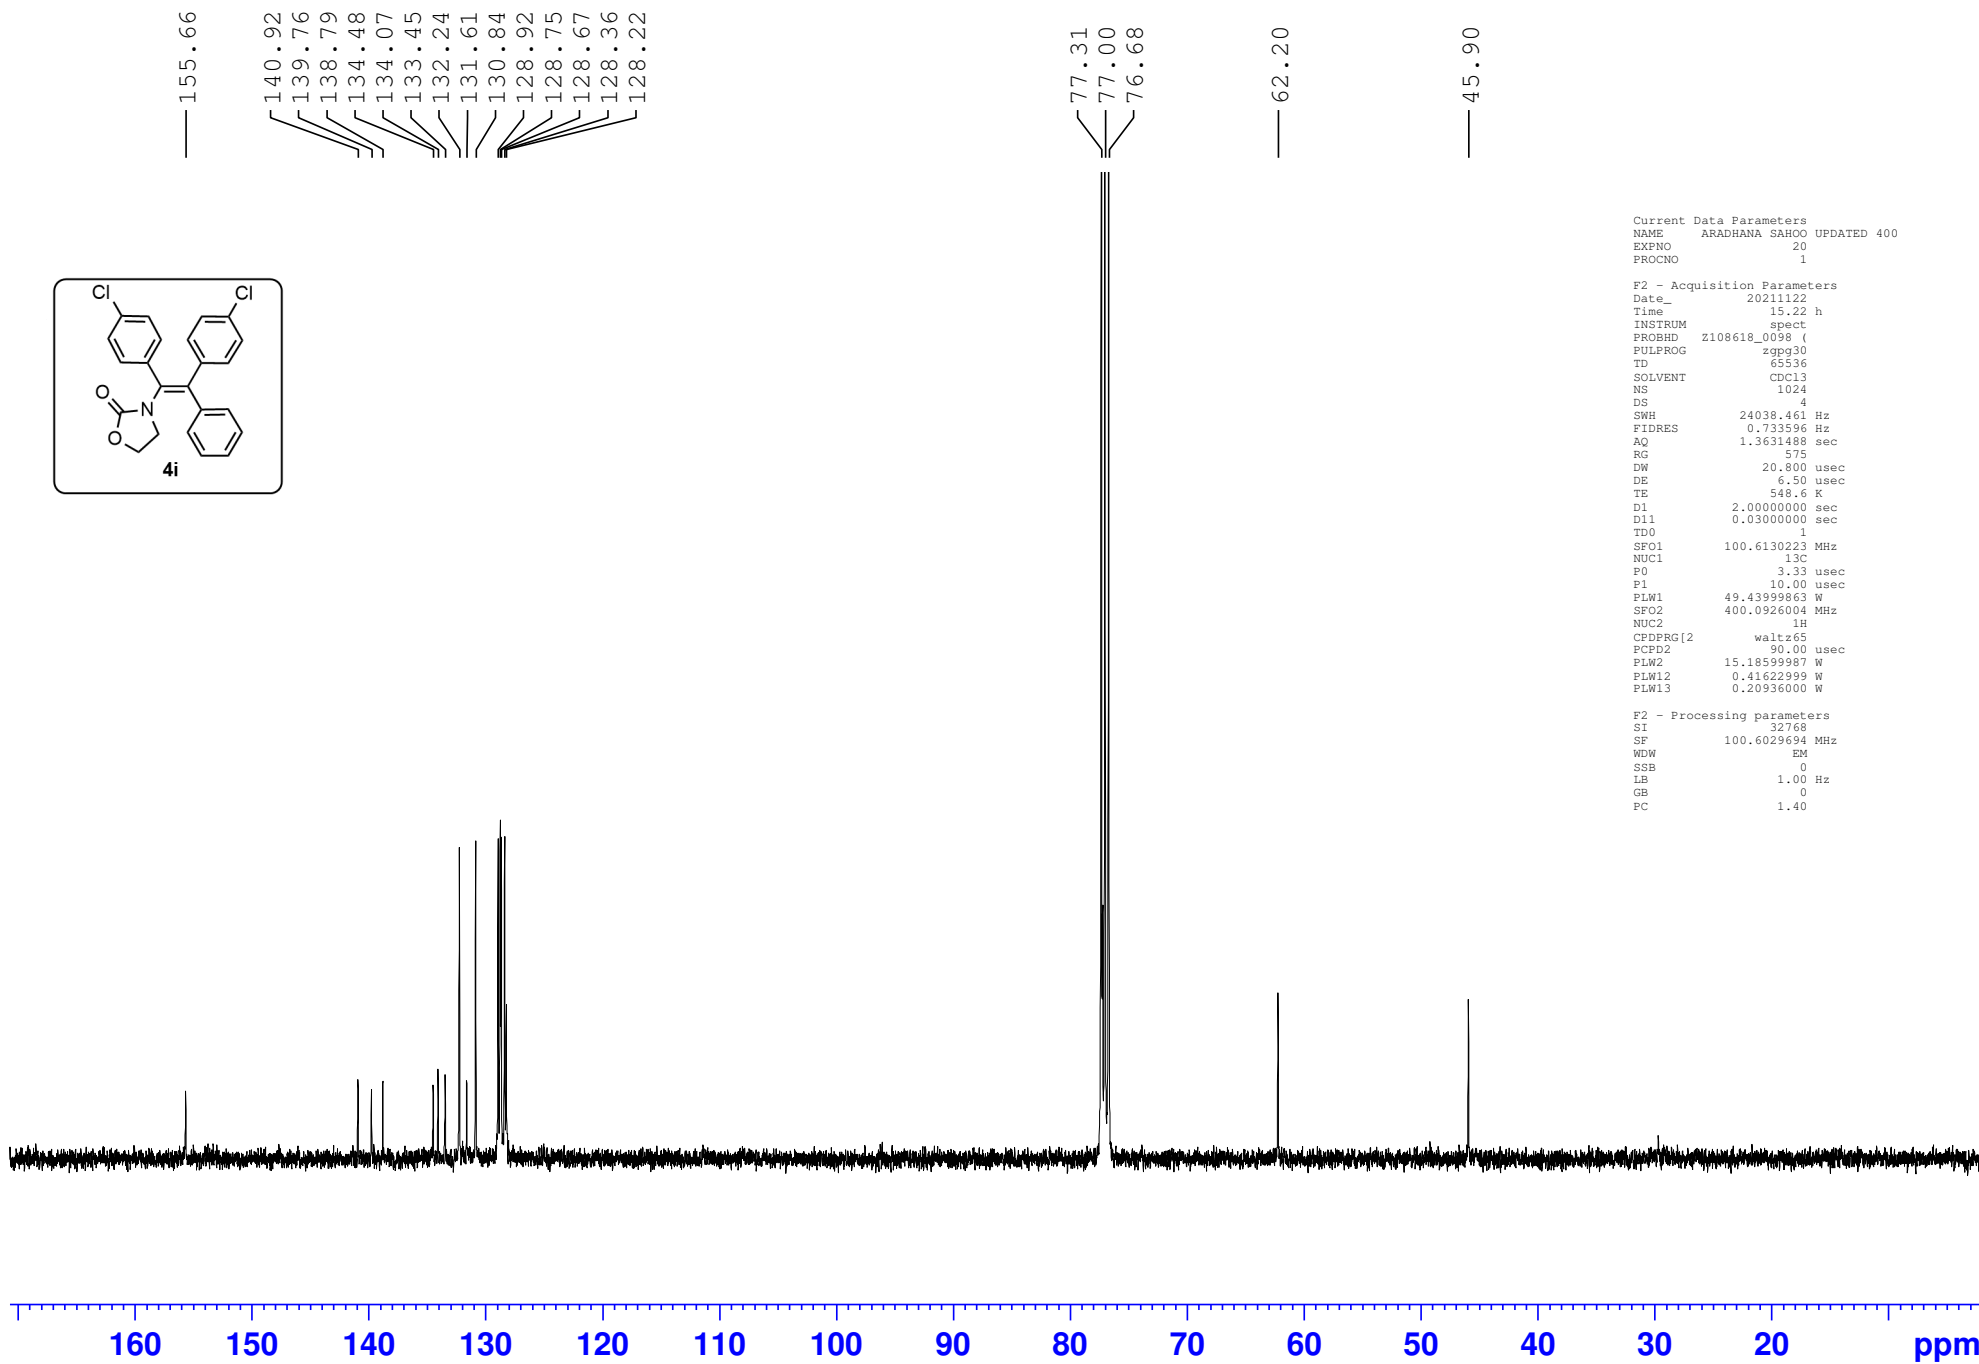

```

Current Data Parameters
NAME      ARADHANA SAHOO UPDATED 400
EXPNO    20
PROCNO   1

F2 - Acquisition Parameters
Date_    20211122
Time     15.22 h
INSTRUM  spect
PROBHD   Z108618_0098 (
PULPROG  zgpg30
TD       65536
SOLVENT  CDCl3
NS       1024
DS       4
SWH      24038.461 Hz
FIDRES   0.733596 Hz
AQ       1.3631488 sec
RG       575
DW       20.800 usec
DE       6.50 usec
TE       548.6 K
D1       2.0000000 sec
D11      0.0300000 sec
TD0      1
SFO1     100.6130223 MHz
NUC1     13C
P0       3.33 usec
P1       10.00 usec
PLW1     49.43999863 W
SFO2     400.0926004 MHz
NUC2     1H
CPDPRG2  waltz65
PCPD2    90.00 usec
PLW2     15.18599987 W
PLW12    0.41622999 W
PLW13    0.20936000 W

F2 - Processing parameters
SI       32768
SF       100.6029694 MHz
WDW      EM
SSB      0
LB       1.00 Hz
GB       0
PC       1.40

```

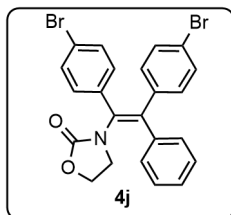

7.437  
7.420  
7.406  
7.402  
7.377  
7.374  
7.360  
7.353  
7.349  
7.345  
7.336  
7.331  
7.328  
7.276  
7.272  
7.260  
7.240  
7.237  
7.223  
7.221  
7.076  
7.072  
7.068  
7.058  
7.055  
7.050  
6.893  
6.888  
6.884  
6.875  
6.871  
6.866  
4.220  
4.205  
4.188  
3.495  
3.479  
3.463

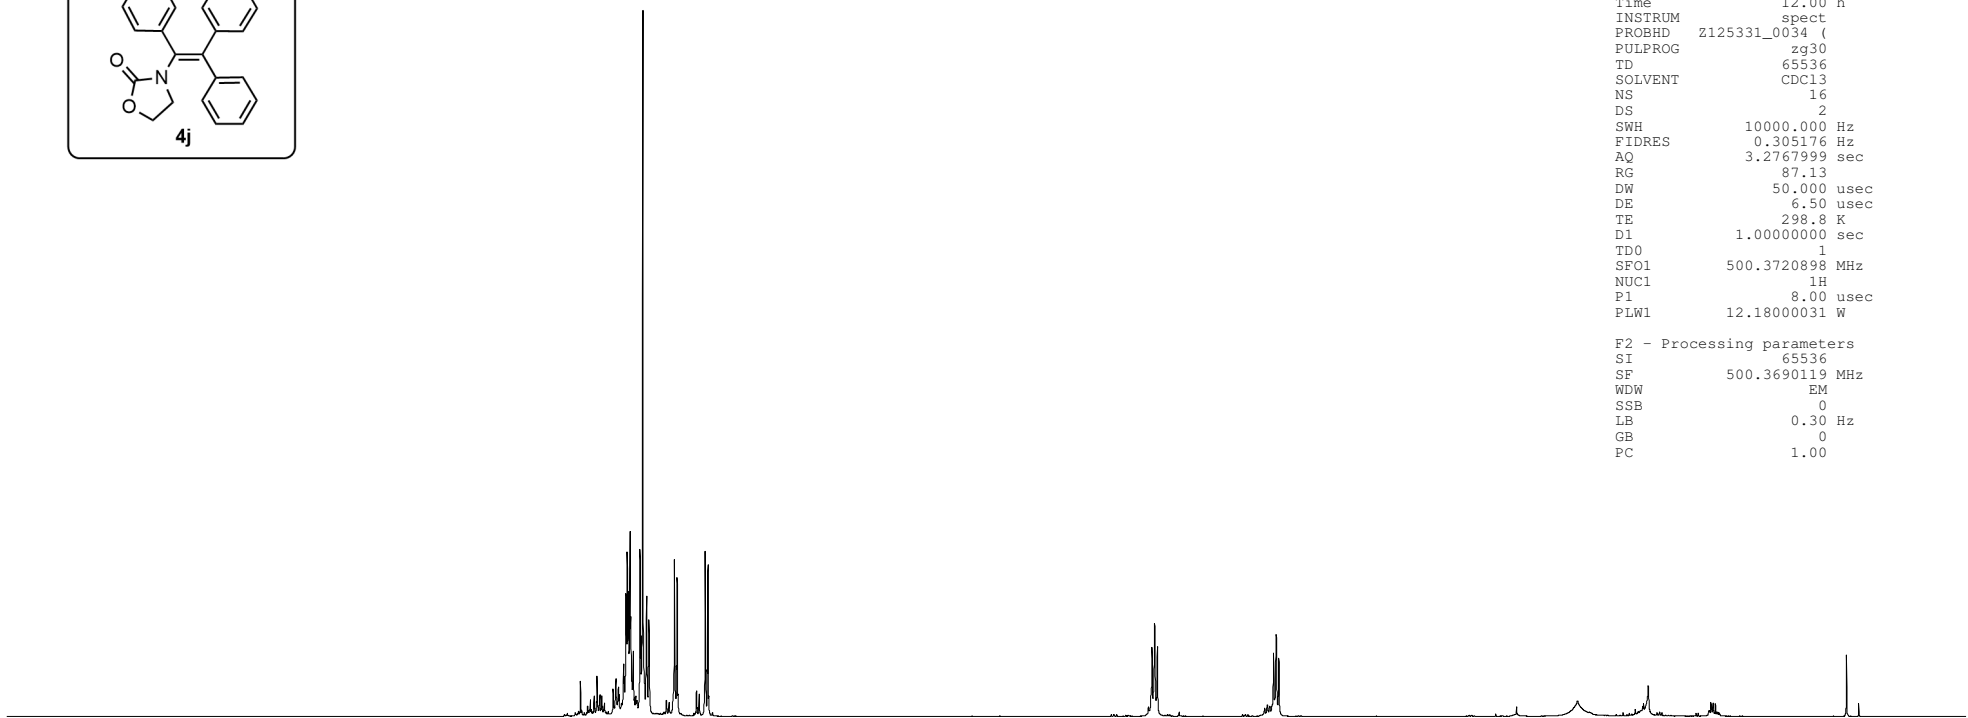

1.00  
3.16  
2.06  
1.05  
2.10  
2.06  
2.00

2.07

2.01

Current Data Parameters  
NAME ARADHANA SAHOO ASCEND 500  
EXPNO 45  
PROCNO 1

F2 - Acquisition Parameters  
Date\_ 20211123  
Time 12.00 h  
INSTRUM spect  
PROBHD Z125331\_0034 (  
PULPROG zg30  
TD 65536  
SOLVENT CDCl3  
NS 16  
DS 2  
SWH 10000.000 Hz  
FIDRES 0.305176 Hz  
AQ 3.2767999 sec  
RG 87.13  
DW 50.000 usec  
DE 6.50 usec  
TE 298.8 K  
D1 1.00000000 sec  
TD0 1  
SFO1 500.3720898 MHz  
NUC1 1H  
P1 8.00 usec  
PLW1 12.18000031 W

F2 - Processing parameters  
SI 65536  
SF 500.3690119 MHz  
WDW EM  
SSB 0  
LB 0.30 Hz  
GB 0  
PC 1.00



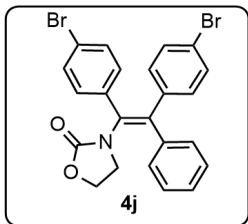

155.63  
 141.28  
 140.30  
 138.79  
 135.84  
 133.20  
 132.59  
 132.21  
 131.74  
 129.24  
 129.08  
 128.47  
 121.78  
 121.24

62.86

45.84  
 40.64  
 40.43  
 40.22  
 40.01  
 39.80  
 39.60  
 39.39  
 29.49

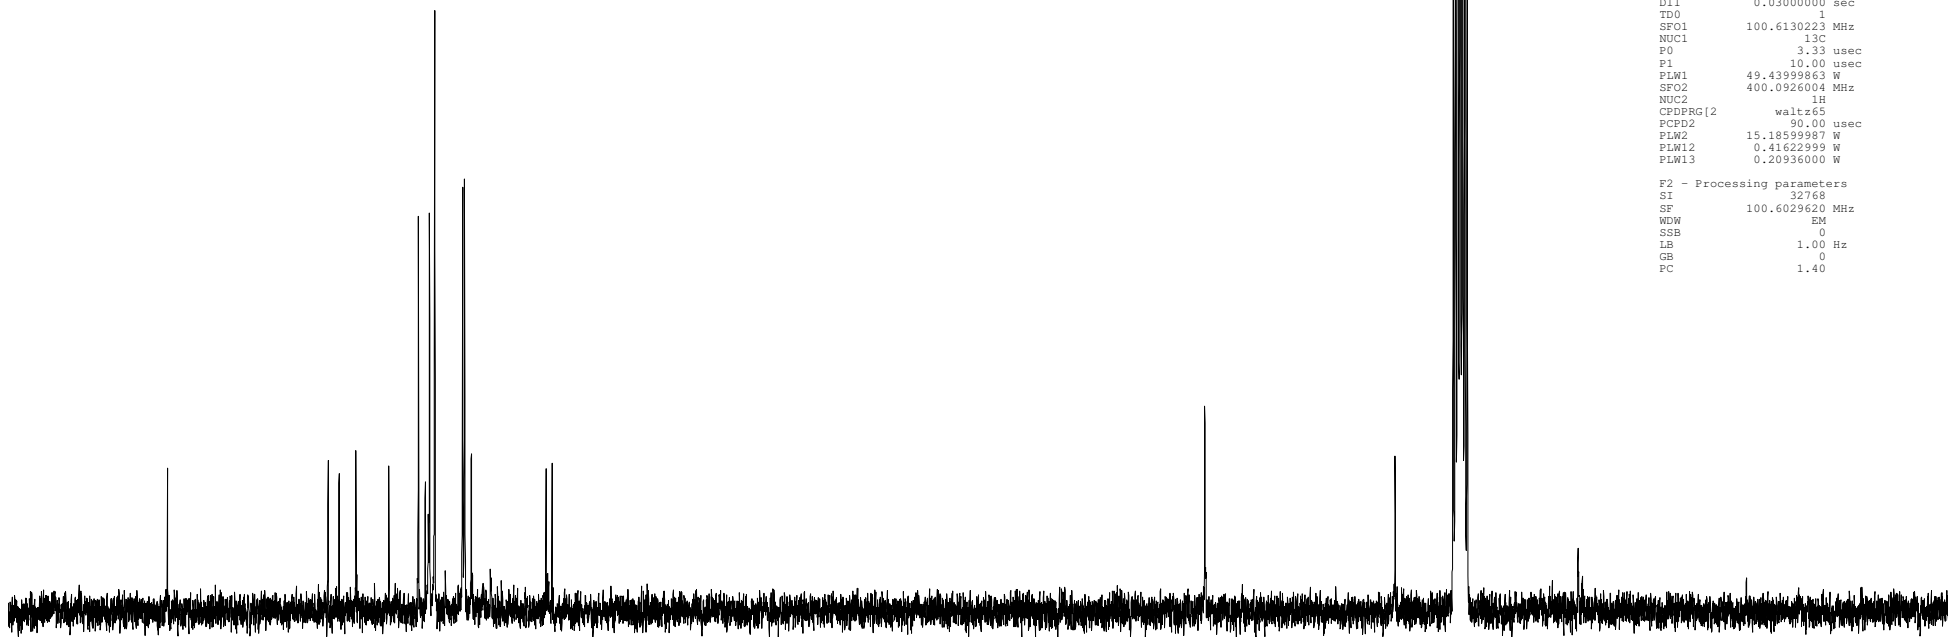

```

Current Data Parameters
NAME      aradhana student 400 MHz
EXPNO     34
PROCNO    1

F2 - Acquisition Parameters
Date_     20230512
Time      15.26 h
INSTRUM   spect
PROBRD    2108618_0098 (
PULPROG   zgpg30
TD         65536
SOLVENT   DMSO
NS         789
DS         4
SWH        24038.461 Hz
FIDRES     0.733596 Hz
AQ         1.3631488 sec
RG         1030
DW         20.800 usec
DE         6.50 usec
TE         430.0 K
D1         2.00000000 sec
D11        0.03000000 sec
TD0        1
SFO1       100.6130223 MHz
NUC1       13C
FO         3.33 usec
P1         10.00 usec
PLW1       49.43999863 W
SFO2       400.0926004 MHz
NUC2       1H
CPDPRG[2] waltz65
PCPD2      90.00 usec
PLW2       15.18599987 W
PLW12      0.41622999 W
PLW13      0.20936000 W

F2 - Processing parameters
SI         32768
SF         100.6029620 MHz
WDW        EM
SSB        0
LB         1.00 Hz
GB         0
PC         1.40
  
```
